# Supplementary material for: Prevalence of overweight and obesity and associated risk factors among adult residents of northwest China: a cross-sectional study
Source: PubMed Central journal article supplement — BMJ Open. 2019 Sep 27;9(9):e028131. doi: 10.1136/bmjopen-2018-028131 (PMC6773337; doi:10.1136/bmjopen-2018-028131), 2019-09-27
Supplement: bmjopen-2018-028131.draft_revisions.pdf [file bmjopen-2018-028131.draft_revisions.pdf]

# BMJ Open

BMJ Open is committed to open peer review. As part of this commitment we make the peer review history of every article we publish publicly available.

When an article is published we post the peer reviewers' comments and the authors' responses online. We also post the versions of the paper that were used during peer review. These are the versions that the peer review comments apply to.

The versions of the paper that follow are the versions that were submitted during the peer review process. They are not the versions of record or the final published versions. They should not be cited or distributed as the published version of this manuscript.

BMJ Open is an open access journal and the full, final, typeset and author-corrected version of record of the manuscript is available on our site with no access controls, subscription charges or pay-per-view fees (<http://bmjopen.bmj.com>).

If you have any questions on BMJ Open's open peer review process please email [editorial.bmjopen@bmj.com](mailto:editorial.bmjopen@bmj.com)

# BMJ Open

## Prevalence of overweight and obesity and associated risk factors among adult residents of northwest China: A cross-sectional study

|                               |                                                                                                                                                                                                                                                                                                                                                                                                                                                                                                                                         |
|-------------------------------|-----------------------------------------------------------------------------------------------------------------------------------------------------------------------------------------------------------------------------------------------------------------------------------------------------------------------------------------------------------------------------------------------------------------------------------------------------------------------------------------------------------------------------------------|
| Journal:                      | <i>BMJ Open</i>                                                                                                                                                                                                                                                                                                                                                                                                                                                                                                                         |
| Manuscript ID                 | bmjopen-2018-028131                                                                                                                                                                                                                                                                                                                                                                                                                                                                                                                     |
| Article Type:                 | Research                                                                                                                                                                                                                                                                                                                                                                                                                                                                                                                                |
| Date Submitted by the Author: | 27-Nov-2018                                                                                                                                                                                                                                                                                                                                                                                                                                                                                                                             |
| Complete List of Authors:     | Yang, Yi-Ning; First Affiliated Hospital of Xinjiang Medical University, Department of Cardiology<br>Song, Ning; The First Affiliated Hospital of Xinjiang Medical University, Department of Cardiology; The First Affiliated Hospital of Xinjiang Medical University, Department of Cardiology<br>Fen, Liu<br>Li, Xiao-Mei<br>Zhao, Qian; First Affiliated Hospital of Xinjiang Medical University, Department of Health Management & Physical Examination Center<br>Han, Min<br>Li, Xiangmei<br>Zhao, Qiang<br>Du, Guoli<br>Zhai, Hui |
| Keywords:                     | cross-sectional survey, overweight, obesity, risk factors                                                                                                                                                                                                                                                                                                                                                                                                                                                                               |
|                               |                                                                                                                                                                                                                                                                                                                                                                                                                                                                                                                                         |

SCHOLARONE™  
Manuscripts

**Prevalence of overweight and obesity and associated risk factors among adult residents of  
northwest China: A cross-sectional study**

Ning Song<sup>1, 2 +</sup>, Fen Liu<sup>1, 2 +</sup>, Min Han<sup>1, 2</sup>, Qiang Zhao<sup>1,2</sup>, Qian Zhao<sup>1,2</sup>, Hui Zhai<sup>1,2</sup>,  
Xiangmei Li<sup>1,2</sup>, Guoli Du<sup>1,2</sup>, Xiaomei Li<sup>1,2,\*</sup>, and Yining Yang<sup>1,2,\*</sup>

1 Department of Cardiology, First Affiliated Hospital, Xinjiang Medical University, Urumqi, China;

2 Xinjiang Key Laboratory of Cardiovascular Disease Research, Urumqi, China.

+ These authors have contributed equally to this work.

**\*Corresponding Author**

Full name: Xiao-Mei Li

Institute: Xinjiang Key Laboratory of Cardiovascular Disease Research, Urumqi, China.

Department: Department of Cardiology, The First Affiliated Hospital of Xinjiang Medical  
University.

Street Name & Number: 137 Liyushan South Road, Urumqi, 830054, China.

Telephone: 18690897592 Fax number: 0991-4362611 e-mail: [lixm505@163.com](mailto:lixm505@163.com).

Full name: Yi-Ning Yang

Institute: Xinjiang Key Laboratory of Cardiovascular Disease Research, Urumqi, China.

Department: Department of Cardiology, The First Affiliated Hospital of Xinjiang Medical  
University.

Street Name & Number: 137 Liyushan South Road, Urumqi, 830054, China.

Tel: 86-991-4361690 Fax: 86-991-4365330 E-mail: [yangyn5126@163.com](mailto:yangyn5126@163.com).

## Abstract

**Objective:** Overweight and obesity have been shown to be related to multiple chronic conditions and lead to a heavy economic burden on society throughout the world. This study aims to estimate the prevalence of overweight and obesity and determine potential influencing factors among adults in Xinjiang, northwest China.

**Design:** A community-based observational study.

**Setting:** The First Affiliated Hospital of Xinjiang Medical University.

**Methods:** In total, 14,618 adult participants (7,799 males; 6,819 females), aged over 35 years old, were recruited from the Cardiovascular Risk Survey conducted in 2010. Data were obtained from face-to-face interview and physical examination. The sample was used to estimate the prevalence of overweight (body mass index (BMI) 24-27.9 kg/m<sup>2</sup>) and obesity (BMI>28 kg/m<sup>2</sup>) in Xinjiang Province, and the influencing factors were analyzed based on statistical methods.

**Results:** The overall prevalence of overweight was 36.52% (male 40.1%; female; 33.4%), and the prevalence of obesity was 26.47% (male 27.2%; female 25.8%) in Xinjiang Province. The prevalence of both overweight and obesity were higher in women than men ( $P<0.001$ ). The main influencing factors for overweight and obesity are sex, age, race, marriage status, education level, occupation, smoking, drinking, hypertension, diabetes and dyslipidemia ( $P<0.05$ ).

**Conclusions:** This study estimated that the prevalence of overweight and obesity among adult residents of Xinjiang Province, northwest China, was high. These data suggest that efforts toward prevention and control of overweight and obesity should be a public health priority in the northwest of China.

**Keywords:** cross-sectional survey, overweight, obesity, risk factors

### Strengths and limitations of this study

- The survey sample was demographically representative of Uygur obese adults aged 35–80 years in Xinjiang.
- The main strengths of our study are its large sample size and precise physical measurements, which increase the validity of our results.
- This is the first study to date that investigate the association of overweight and obesity and races in adults.
- However, the present study has several limitations. First, self-reported data and the nature of

1  
2  
3  
4 cross-sectional data may lead to recall and reporting biases, which may be the reason for the  
5 insignificant difference in the effect of obesity on reasons.  
6

- 7  
8 ➤ Moreover, other indicators of adiposity, such as body fat percentage and waist circumference  
9 which plenty of studies reported to reflect the prevalence of overweight and obesity and body  
10 fat distribution, were not obtained in our study.  
11  
12  
13

## 14 15 **Introduction**

16  
17 Obesity is a complex chronic global disease affecting people worldwide across all ages, sexes,  
18 ethnicities, and nationalities, which is the fifth leading cause of mortality globally [1, 2]. According  
19 to the World Health Organization (WHO), the prevalence of worldwide obesity has doubled in more  
20 than 70 countries since 1980 [3]; this trend has continuously increased in most other countries. In  
21 2013, in order to make physicians pay more attention to the condition, the American Medical  
22 Association classified obesity as a disease [4].  
23  
24

25  
26 Body mass index (BMI), which is calculated as weight/height squared ( $\text{kg}/\text{m}^2$ ), is a common  
27 and accepted measure that is used to report obesity rates. While BMI is not a true measure of  
28 adiposity, it is simple to use in health screenings and epidemiological surveys [5]. According to the  
29 WHO, obesity is defined as a  $\text{BMI} \geq 30 \text{ kg}/\text{m}^2$ , and overweight as a BMI of  $25\text{-}9.9 \text{ kg}/\text{m}^2$  [6]. For  
30 Chinese people, obesity suggests a  $\text{BMI} \geq 28 \text{ kg}/\text{m}^2$  and overweight indicates a BMI of  $24\text{-}27.9 \text{ kg}/\text{m}^2$   
31 [7].  
32  
33

34  
35 China is the largest developing country and has the largest population in the world. With the  
36 rapid economic growth and changes in lifestyle such as dietary habits and physical activity [8], the  
37 epidemiological data indicated that individuals with overweight and obesity had a higher prevalence  
38 of traditional diseases including dyslipidemia, hypertension, cardiovascular disease, insulin  
39 resistance or diabetes, fatty liver disease, and psychosocial complications and some cancers [5, 9].  
40 Located in the northwest China, Xinjiang not only is an autonomous minority ethnic region of the  
41 People's Republic of China, but also is one of the developing regions in China. It is the largest  
42 Chinese administrative division and spans over 1.66 million  $\text{km}^2$  which takes up about one sixth of  
43 the country's territory. A few of studies had reported the prevalence of overweight among adults in  
44 Xinjiang [10]. Nevertheless, the samples in above mentioned studies were small, those results  
45 cannot represent accurately the status of overweight and obesity in the whole region of Xinjiang.  
46  
47  
48  
49  
50  
51  
52  
53  
54  
55  
56  
57  
58  
59  
60

1  
2  
3  
4 In the present study, we estimate the prevalence of overweight and obesity in Xinjiang.  
5  
6 Meanwhile, the potential influencing factors in adult residents of northwest China were explored.  
7  
8 The results of this study will be considered as a reference for policy makers in making informed  
9  
10 decisions.

## 11 **Materials and Methods**

### 12 **Ethics approval**

13  
14  
15 This study was conducted according to the standards of the Declaration of Helsinki. Written  
16  
17 informed consent was acquired from each participant prior to enrollment. Ethics approval was from  
18  
19 the Ethics Committee of the First Affiliated Hospital of Xinjiang Medical University.  
20

### 21 **Study design and population**

22  
23 This population-based cross-sectional survey is part of the Project on Present Situation and the  
24  
25 Cardiovascular Risk Survey (CRS) study in Xinjiang Province of China in 2010. The CRS was a  
26  
27 prospective, multiple ethnicity and community-based observational study designed to investigate  
28  
29 the prevalence and risk factors for cardiovascular disease (CVD) in the Han, Uyghur and Kazakh  
30  
31 populations in Xinjiang Province [11]. All the subjects included had lived in Xinjiang Province for  
32  
33 more than 1 year. Briefly, the CRS consisted of 16,460 adults aged  $\geq 35$  years old, of whom 14,618  
34  
35 subjects (5,757 Han, 4,767 Uyghur and 4,094 Kazakh Chinese) completed the survey, yielding a  
36  
37 response rate of 88.8%. We used a multistage stratified sampling method to select the study sample  
38  
39 from 6 different administrative regions including Urumqi, Yili, Hetian, Kalamayi, Fukang, and  
40  
41 Turpan. Finally, each participant was selected randomly from each household in the sites mentioned  
42  
43 above.

### 44 **Data collection**

45  
46 The formal survey was made up of two parts: face-to-face interview and physical examination.  
47  
48 Before the formal survey, we conducted a pre-survey to explore the feasibility of the questionnaire.  
49  
50 During the investigation, each completed questionnaire was examined by two investigators to ensure  
51  
52 validity and consistency. After the fieldwork, data were manipulated by parallel double entry, and  
53  
54 we also performed three verifications to check for incomplete and inconsistent responses. The  
55  
56 questionnaire provided demographics, general personal information and medical histories [12].  
57  
58 Height and weight were measured using a standard protocol. Height was measured to the nearest  
59  
60 0.1 cm, and weight was measured with a standard scale in the upright position to the nearest 0.1 kg.

Smoking and drinking conditions were self-reported.

Blood samples collection was conducted in examination centers at local hospital in the participants' residential area. At the time of the in-person interview, a 5 mL of venous blood was collected into EDTA tubes and processed to obtain plasma within 4h. All samples were stored at -80°C immediately after processing. We measured the concentration of fasting glucose using equipment for chemical analysis (Dimension AR/AVL Clinical Chemistry System, Newark, NJ, USA) employed by the Clinical Laboratory Department of the First Affiliated Hospital of Xinjiang Medical University. Biochemical markers in plasma including total cholesterol (TC), triglycerides (TG), high-density lipoprotein cholesterol (HDL-C) and low-density lipoprotein cholesterol (LDL-C) were measured.

### Definition of variables

Overweight and obesity were defined by Chinese standards mentioned above. Obesity was defined as  $BMI \geq 28 \text{ kg/m}^2$ , and overweight was defined as a BMI of 25-29.9  $\text{kg/m}^2$ .

Education was classified into four levels: Primary school and below (including never attended school and elementary schooling only); Junior middle school; Senior middle school (including secondary vocational schooling); undergraduate and above (including post-secondary vocational schooling, Master and doctor). Manual labor included farmers, production and service workers. White collar occupations included office and other technical employment. Other occupations included unemployed, retiree, student and full-time housewife [13]. Smoking status classifications were current smokers (which had smoked at least one cigarette a day over the past 30 days), and never-smokers. Drinking status classifications were current drinkers (which had consumed more than one alcoholic drink a week), and never-drinkers. Hypertension was defined as mean systolic  $BP \geq 140 \text{ mmHg}$ , and/or mean diastolic  $BP \geq 90 \text{ mmHg}$ , and/or current use of antihypertensive medications [14]. Diabetes was defined as fasting plasma glucose  $\geq 126 \text{ mg/dL}$  ( $\geq 7.0 \text{ mmol/L}$ ) and/or self-reported history of diabetes and/or current use of insulin or antidiabetic medications [15]. Hypercholesterolemia was defined as serum total cholesterol level  $> 6.22 \text{ mmol/L}$  (240  $\text{mg/dL}$ ), and hypertriglyceridemia was defined as serum triglyceride level  $> 2.26 \text{ mmol/L}$  (200  $\text{mg/dL}$ ). A serum LDL-C level of  $> 4.14 \text{ mmol/L}$  (160  $\text{mg/dL}$ ) was defined as high LDL-C, and a serum HDL-C level of  $< 1.04 \text{ mmol/L}$  (40  $\text{mg/dL}$ ) was defined as low HDL-C. In total, dyslipidemia was defined as the existence of at least one of the four abnormal lipid concentrations mentioned above, or self-reported

1  
2  
3  
4 use of lipid-lowering drugs [16].

### 5 6 **Statistical analysis**

7  
8 Data was verified and corrected using EpiData3.02 software (EpiData, Association, Odense,  
9 Denmark) by 2 staff members. Frequency distribution was used to present characteristics of the  
10 subjects, and data presented as percentages were used to report the prevalence ratio. Continuous  
11 variables were expressed as mean  $\pm$  standard deviation (SD) and or numerical data were expressed  
12 as rates, and a Chi-square test ( $\chi^2$ ) was used to compare the prevalence of overweight and obesity  
13 in different groups.  
14  
15

16  
17 To analyze the factors for obesity and adjust for potential confounding effects, a multivariate  
18 logistic regression analyses were carried out to explore independent factors associated with  
19 overweight and obesity. OR with 95% CI was used for the risk analysis. All statistical analyses were  
20 conducted using the complex sampling function of Social Sciences SPSS for Windows version 22.0  
21 (SPSS, Inc, Chicago, IL, USA), and a  $p < 0.05$  level of significance was selected.  
22  
23

### 24 25 **Patient and public involvement**

26  
27 This population-based cross-sectional survey is part of the Project on Present Situation and  
28 the Cardiovascular Risk Survey (CRS) study in Xinjiang Province of China in 2010. The study  
29 was designed to investigate the prevalence of overweight and obesity among adult residents in  
30 Xinjiang, the northwest China. However, no patients or members of the public were included in  
31 the design, recruitment or conduct of the study. The results of measurements would be  
32 disseminated to participants after the study which was completed by the study team. The burden of  
33 the intervention will not be assessed by patients themselves.  
34  
35

### 36 37 **Results**

38  
39 In this survey, we interviewed 14618 residents aged 35 to 101 years (mean age:  $50.82 \pm 12.62$   
40 years), comprised of 6,819 (46.6%) men and 7,799 (53.4%) women. Among these participants,  
41 5,757 (39.4%) were Han ethnicities with a mean age of  $52.47 \pm 12.71$  years, 4,767 (32.6%) were  
42 Uygur ethnicities with a mean age of  $50.70 \pm 12.98$  years, and 4,094 (28.0%) were Kazakh ethnicities  
43 with a mean age of  $48.63 \pm 11.69$  years. According to the BMI classification for Chinese people, the  
44 overall prevalence of overweight was 36.52% (male 40.1%; female 33.4%), and the prevalence of  
45 obesity was 26.47% (male 27.2%; female 25.8%) in Xinjiang Province (**Table 1**). There were  
46 differences in age, area, race, occupation, education, marriage, drinking, hypertension history and  
47  
48  
49  
50  
51  
52  
53  
54  
55  
56  
57  
58  
59  
60



1  
2  
3  
4 plasma levels of TG, TC among the overweight and obesity groups, while there was no significant  
5 difference in sex, smoking, diabetes history and the level of LDL-c and HDL-C among the 2 groups.  
6

7  
8 From the age-stratified and gender-stratified results in **Table 2**, for men, the prevalence of both  
9 overweight and obesity all peaked at 45-54 years, while no significant trend was illustrated in the  
10 prevalence of overweight increased with age. For women, the prevalence of overweight and obesity  
11 increased with age, peaking at 55-64 years, though there has a slight decrease at  $\geq 65$  years. In  
12 addition, a higher proportion of enrolled males were overweight than females. Interestingly, the  
13 proportions of females who were obese were higher than those of males.  
14  
15

16  
17 From the age-stratified and race-stratified results in **Table 3**, as a whole, obesity prevalence in  
18 the different ethnicities was found to be the highest in Kazakh and the lowest in Han participants,  
19 and there was a statistical significance among the three ethnic groups ( $p < 0.001$ ). Further, overweight  
20 prevalence also showed an interesting significant difference among the three ethnicities, the highest  
21 in Han and the lowest in Kazakh participants.  
22  
23

24  
25 We divided the participants into two groups: normal weight; overweight and obese. **Table 1**  
26 has showed that the following factors all had a significant effect: age, area, race, education, marriage  
27 status, occupation, drinking, hypertension and dyslipidemia ( $p < 0.05$ ). We applied multivariate  
28 unconditional logistic regression analysis model on all identified risk factors and attempted to  
29 identify any existing difference in these risk factors which may explain the difference in overweight  
30 and obesity prevalence. **Table 4** shows the results of logistic regression models comparing the  
31 prevalence of the potential risk factors: sex, age, area, marriage status, occupation, smoking,  
32 drinking, hypertension, diabetes and the level of dyslipidemia, including hypercholesterolemia,  
33 hypertriglyceridemia and low HDL-C. The multivariate logistic regression results reveal that female  
34 adults are more likely to become overweight and obese than male adults (OR 0.77, 95% CI 0.71 to  
35 0.84). We categorized age into four groups, which clearly showed that increasing age is a risk factor  
36 for overweight/obesity, especially age 45-54 years (OR 1.46, 95% CI 1.33 to 1.61). Among the three  
37 races, Kazak population (OR 1.66, 95% CI 1.49 to 1.84) and Uygur population (OR 1.44, 95% CI  
38 1.30 to 1.59) are the risky people to become overweight and obese comparing with Han population.  
39 Participants who have married (OR 1.83, 95% CI 1.36 to 2.47) or widowed (OR 1.81, 95% CI 1.30  
40 to 2.51) are more likely to be overweight/obese than those who have unmarried. In addition, smokers  
41 (OR 0.86, 95% CI 0.78 to 0.95) are less likely to become overweight and obese than nonsmokers.  
42  
43  
44  
45  
46  
47  
48  
49  
50  
51  
52  
53  
54  
55  
56  
57  
58  
59  
60

1  
2  
3  
4 Participants who drink are more likely to become overweight or obese than those who never or  
5 rarely drink (OR 1.45, 95% CI 1.28 to 1.64). Overweight and obesity are more common among  
6 those who had hypertension (OR 2.14, 95% CI 1.97 to 2.32) and diabetes (OR 1.32, 95% CI 1.12  
7 to 1.57) compared with those who had no hypertension and diabetes history. In the overweight and  
8 obese population, hypertriglyceridemia (OR 2.43, 95% CI 2.22 to 2.66), hypercholesterolemia (OR  
9 1.23, 95% CI 1.13 to 1.34) and low HDL-C (OR 1.11, 95% CI 1.02 to 1.20) remained as risk factors.

## 15 Discussion

16  
17 The epidemic of obesity is one of the most important health problems worldwide and is  
18 estimated to be the second leading cause of preventable death in developed countries, behind  
19 cigarette smoking [3, 17]. The prevalence of overweight and obesity continues to increase around  
20 the world, as have associated comorbidities and healthcare costs [18]. In the US, the prevalence of  
21 obesity accounts for one-third of the general population, and another one-third is overweight [19].  
22 Data from the China Chronic Disease Survey conducted by the Chinese Center for Disease Control  
23 and Prevention demonstrated that the prevalence of overweight among Chinese adults (age 18–64  
24 years) for 2007 and 2010 was 26.6% and 30.6%, respectively (male 27.4% and 32.1%; female 25.7%  
25 and 29.1%), and the prevalence of obesity was 7.7% and 12.1%, respectively (male 6.7% and 12.5%;  
26 female 8.7% and 11.1%). No doubt, we found that the prevalence of both overweight and obesity  
27 was high. Our cross-sectional study indicates that the prevalence of overweight and obesity among  
28 adults in northwest China was 36.52% (male 40.1%; female 33.4%), and 26.47% (male 27.2%;  
29 female 25.8%). This implies that overweight and obesity have a higher prevalence in both sexes and  
30 are more common in northwest China than in other areas, although effective actions might have  
31 been taken to control the upward trend [20].

32  
33 In this study, we found that the prevalence of both overweight and obesity is high in middle  
34 age (45-64 years). Chinese people are more likely to have positive perceptions of obesity because it  
35 is considered good fortune to become fat during middle age in traditional Chinese culture [21].  
36 Through the present study, we found a very high prevalence of overweight and obesity in three  
37 ethnicities in Xinjiang, and there is no doubt that the result is similar to the previous study in  
38 Xinjiang [10]. In addition, the prevalence rate of obesity was significantly different among Han,  
39 Uygur and Kazak groups and the prevalence in Kazak group was significantly higher compared  
40 with Han and Uygur. Overall, our findings indicate that 16.28% of Han, 11.18% of Uygur, and 9.05%  
41  
42  
43  
44  
45  
46  
47  
48  
49  
50  
51  
52  
53  
54  
55  
56  
57  
58  
59  
60

1  
2  
3  
4 of Kazak people more than 35 years of age in Xinjiang have overweight, as with 7.40% of Han,  
5 9.31% of Uygur, and 9.76% of Kazak people have obesity. Xinjiang is a multi-ethnic co-populated  
6 area in China. The national census showed that lives 47 ethnicities in Xinjiang, and 13 of them are  
7 confirmed to be native ethnicities, such as the Uygur and Kazak. The explanations for this increase  
8 of prevalence as follows: firstly, Kazak live in the grassland and forests, whose dietary habits were  
9 characterized by eating more animal and consuming fewer fresh vegetables; Secondly, Kazak is a  
10 nomadic ethnic who usually lives in hypoxia area and high altitude where the climate is cold and  
11 dry; Thirdly, different genetic backgrounds may also an important factor underlying the different  
12 prevalence of obesity [22].

13  
14  
15  
16  
17  
18  
19  
20  
21 Multivariate logistic regression analysis suggested that several factors are associated with the  
22 prevalence of overweight and obesity. A previous review revealed that various marital transitions  
23 are related with changes in body weight: transition into marriage appears to be associated with  
24 weight gain, whereas transition out of marriage is associated with weight loss [23]. Our study found  
25 a similar result that, transition into marriage including married, divorce and widowed are risk factors  
26 for becoming overweight and obese. Plausible explanations are behaviors and lifestyle which differ  
27 among married individuals, however, the exact mechanism is not clear to illustrate this apparent  
28 association with marriage status. In our study, it is also found that different educational levels,  
29 occupations and area of residence are closely related to body weight. We have observed that low  
30 education level is a risk factor because of insufficient level of cognition. Urban population,  
31 especially unemployed, retiree, student and full-time housewife, are more risky among overweight  
32 and obese, which contribute to urban working conditions, for example sitting in the office, fast-  
33 paced life and supermarket or fast food restaurant availability [24].

34  
35  
36  
37  
38  
39  
40  
41  
42  
43  
44  
45  
46 The 2015 Global Burden of Disease Study, representing 195 countries and territories, estimated  
47 that 25% of men and 5.4% of women worldwide smoked daily, which is the leading preventable  
48 cause of death worldwide [25]. In this study, we found a lower prevalence of overweight and obesity  
49 in smokers than non-smokers, which is consistent with studies conducted in Switzerland, India and  
50 Jilin, China [26-28]. In addition, reasonable explanations to illustrated the issue according to two  
51 different criteria. In terms of tobacco use, using tobacco is connected with multiple system functions,  
52 especially cardiovascular and digestive systems [29]. In terms of the organism itself, smoking has  
53 been considered as methods of pressure and energy relief. Affected by the traditional culture of  
54  
55  
56  
57  
58  
59  
60

1  
2  
3  
4 drinking alcohol, especially in northwest China, it is generally believed that, the more you drink,  
5  
6 the more weight you get. Wang et al [28] showed the consisted results.

7  
8 To the best of our knowledge, obesity is an independent risk factor both of CVD and death  
9  
10 [30-32]. We explore that the prevalence of overweight and obesity are higher if subjects are with  
11  
12 hypertension or diabetes or dyslipidemia. The results provide a compelling reason why the  
13  
14 occurrence of obesity is combined with cardiovascular risk factors such as hypertension, diabetes  
15  
16 or dyslipidemia. Previous studies reported that the benefits of weight loss are well established,  
17  
18 with a 5–10% reduction in weight associated with improvement in health and quality of life, and a  
19  
20 3% reduction being positive for health improvement where it is maintained [33].

21  
22 These departments should heed the high prevalence of overweight and obesity in Xinjiang  
23  
24 Province and provide effective guidelines to help to reverse the trend. The main strengths of our  
25  
26 study are its large sample size and precise physical measurements, which increase the validity of  
27  
28 our results. However, the present study has several limitations. First, self-reported data and the  
29  
30 nature of cross-sectional data may lead to recall and reporting biases, which may be the reason for  
31  
32 the insignificant difference in the effect of obesity on reasons. Moreover, other indicators of  
33  
34 adiposity, such as body fat percentage and waist circumference which plenty of studies reported to  
35  
36 reflect the prevalence of overweight and obesity and body fat distribution, were not obtained in  
37  
38 our study [34, 35].

### 39 **Conclusions**

40  
41 In conclusion, the present study indicates that the prevalence of overweight and obesity  
42  
43 among adult residents in Xinjiang, the northwest China, is very high during the past years.  
44  
45 Furthermore, the main influencing factors for overweight and obesity are sex, age, race, marriage  
46  
47 status, education level, occupation, smoking, drinking, hypertension, diabetes and dyslipidemia.  
48  
49 These data suggest that efforts toward prevention and control of overweight and obesity should be  
50  
51 a public health priority in the northwest of China, which will be submitted to relevant departments  
52  
53 as a reference to reverse the trends.

54  
55 **Funding:** This study was supported by grants from Xinjiang Science and Technology Support  
56  
57 Project(ID 2016E02072) and the Natural Science Foundation of China (ID 81660058).

58  
59 **Acknowledgments:** We thank the Project on Present Situation and the Cardiovascular Risk  
60  
Survey (CRS) study in Xinjiang Province of China for providing necessary data.

**Conflicts of Interest:** The authors declare no conflict of interest.

## References

1. De Luca M, Angrisani L, Himpens J, et al. Indications for Surgery for Obesity and Weight-Related Diseases: Position Statements from the International Federation for the Surgery of Obesity and Metabolic Disorders (IFSO). *Obesity surgery* 2016;26:1659-96.
2. Stevens G, Mascarenhas M, Mathers C. Global health risks: progress and challenges. *Bulletin of the World Health Organization* 2009;87:646.
3. Caballero B. The global epidemic of obesity: an overview. *Epidemiologic reviews* 2007;29:1-5.
4. Addo PN, Nyarko KM, Sackey SO, et al. Prevalence of obesity and overweight and associated factors among financial institution workers in Accra Metropolis, Ghana: a cross sectional study. *BMC research notes* 2015;8:599.
5. Mokdad AH, Ford ES, Bowman BA, et al. Prevalence of obesity, diabetes, and obesity-related health risk factors, 2001. *Jama* 2003;289:76-9.
6. Flegal KM, Kit BK, Orpana H, et al. Association of all-cause mortality with overweight and obesity using standard body mass index categories: a systematic review and meta-analysis. *Jama* 2013;309:71-82.
7. Wang H, Zhai F. Programme and policy options for preventing obesity in China. *Obesity reviews : an official journal of the International Association for the Study of Obesity* 2013;14 Suppl 2:134-40.
8. Popkin BM, Du S, Zhai F, et al. Cohort Profile: The China Health and Nutrition Survey--monitoring and understanding socio-economic and health change in China, 1989-2011. *International journal of epidemiology* 2010;39:1435-40.
9. Ferretti F, Mariani M. Simple vs. Complex Carbohydrate Dietary Patterns and the Global Overweight and Obesity Pandemic. *International journal of environmental research and public health* 2017;14.
10. He J, Guo H, Ding YS, et al. [Epidemiological study on overweight and obesity among rural adult residents in Hazakh, Uygur and Han populations in Xinjiang]. *Zhonghua liu xing bing xue za zhi = Zhonghua liuxingbingxue zazhi* 2013;34:1164-8.
11. Xie X, Ma YT, Yang YN, et al. Alcohol consumption and ankle-to-brachial index: results from the Cardiovascular Risk Survey. *PloS one* 2010;5:e15181.
12. Xiang X, Ma YT, Fu ZY, et al. Haplotype analysis of the CYP8A1 gene associated with myocardial infarction. *Clinical and applied thrombosis/hemostasis : official journal of the International Academy of Clinical and Applied Thrombosis/Hemostasis* 2009;15:574-80.
13. Wang C, Yu Y, Zhang X, Li Y, et al. Awareness, treatment, control of diabetes mellitus and the risk factors: survey results from northeast China. *PloS one* 2014;9:e103594.
14. McManus RJ, Caulfield M, Williams B, National Institute for H, Clinical E. NICE hypertension guideline 2011: evidence based evolution. *Bmj* 2012;344:e181.
15. Nathan DM, Buse JB, Davidson MB, et al. Medical management of hyperglycaemia in type 2 diabetes mellitus: a consensus algorithm for the initiation and adjustment of therapy: a consensus statement from the American Diabetes Association and the European Association for the Study of Diabetes. *Diabetologia* 2009;52:17-30.
16. Joint Committee for Developing Chinese guidelines on P, Treatment of Dyslipidemia in A. [Chinese guidelines on prevention and treatment of dyslipidemia in adults]. *Zhonghua xin xue guan*

- bing za zhi 2007;35:390-419.
17. Lavie CJ, Arena R, Alpert MA, et al. Management of cardiovascular diseases in patients with obesity. *Nature reviews Cardiology* 2018;15:45-56.
18. Collaborators GBDO, Afshin A, Forouzanfar MH, et al. Health Effects of Overweight and Obesity in 195 Countries over 25 Years. *The New England journal of medicine* 2017;377:13-27.
19. Vogelzangs N, Kritchevsky SB, Beekman AT, et al. Obesity and onset of significant depressive symptoms: results from a prospective community-based cohort study of older men and women. *The Journal of clinical psychiatry* 2010;71:391-9.
20. Catala-Lopez F, Genova-Maleras R. [Prevention and control of chronic non-communicable diseases in Spain: A call to action]. *Medicina clinica* 2013;140:502-3.
21. Carroll DD, Blanck HM, Serdula MK, et al. Obesity, physical activity, and depressive symptoms in a cohort of adults aged 51 to 61. *Journal of aging and health* 2010;22:384-98.
22. Wang YT, Adi D, Yu ZX, et al. The burden and correlates of hypertension among Chinese rural population in Han, Uygur, and Kazak: a cross-sectional study. *Journal of the American Society of Hypertension : JASH* 2017;11:737-45 e3.
23. Dinour L, Leung MM, Tripicchio G, et al. The Association between Marital Transitions, Body Mass Index, and Weight: A Review of the Literature. *Journal of obesity* 2012;2012:294974.
24. Saelens BE, Glanz K, Frank LD, et al. Two-Year Changes in Child Weight Status, Diet, and Activity by Neighborhood Nutrition and Physical Activity Environment. *Obesity* 2018;26:1338-46.
25. Collaborators GBDT. Smoking prevalence and attributable disease burden in 195 countries and territories, 1990-2015: a systematic analysis from the Global Burden of Disease Study 2015. *Lancet* 2017;389:1885-906.
26. Marques-Vidal P, Bochud M, Mooser V, et al. Prevalence of obesity and abdominal obesity in the Lausanne population. *BMC public health* 2008;8:330.
27. Siddiquee T, Bhowmik B, Da Vale Moreira NC, et al. Prevalence of obesity in a rural Asian Indian (Bangladeshi) population and its determinants. *BMC public health* 2015;15:860.
28. Wang R, Zhang P, Gao C, et al. Prevalence of overweight and obesity and some associated factors among adult residents of northeast China: a cross-sectional study. *BMJ open* 2016;6:e010828.
29. Marcus MD, Wildes JE. Obesity: is it a mental disorder? *The International journal of eating disorders* 2009;42:739-53.
30. Global BMIMC, Di Angelantonio E, Bhupathiraju Sh N, et al. Body-mass index and all-cause mortality: individual-participant-data meta-analysis of 239 prospective studies in four continents. *Lancet* 2016;388:776-86.
31. Lassale C, Tzoulaki I, Moons KGM, et al. Separate and combined associations of obesity and metabolic health with coronary heart disease: a pan-European case-cohort analysis. *European heart journal* 2018;39:397-406.
32. Fan J, Song Y, Chen Y, et al. Combined effect of obesity and cardio-metabolic abnormality on the risk of cardiovascular disease: a meta-analysis of prospective cohort studies. *International journal of cardiology* 2013;168:4761-8.
33. Espeland MA, Glick HA, Bertoni A, et al. Impact of an intensive lifestyle intervention on use and cost of medical services among overweight and obese adults with type 2 diabetes: the action for health in diabetes. *Diabetes care* 2014;37:2548-56.
34. Zeng Q, Dong SY, Sun XN, et al. Percent body fat is a better predictor of cardiovascular risk



factors than body mass index. Brazilian journal of medical and biological research = Revista brasileira de pesquisas medicas e biologicas 2012;45:591-600.

35. Ramirez-Velez R, Correa-Bautista JE, Gonzalez-Ruiz K, et al. The Role of Body Adiposity Index in Determining Body Fat Percentage in Colombian Adults with Overweight or Obesity. International journal of environmental research and public health 2017;14.

**Table 1 Prevalence of overweight and obesity according to demographic characteristics**

| Characteristic    | N    | Overweight  |          |        | Obesity     |          |        |
|-------------------|------|-------------|----------|--------|-------------|----------|--------|
|                   |      | n (%)       | $\chi^2$ | P      | n (%)       | $\chi^2$ | P      |
| <b>Sex</b>        |      |             |          |        |             |          |        |
| Male              | 6819 | 2735(40.1)  | 71.13    | <0.001 | 1856 (27.2) | 3.70     | 0.054  |
| Female            | 7799 | 2603(33.4)  |          |        | 2013(25.8)  |          |        |
| <b>Age(years)</b> |      |             |          |        |             |          |        |
| 35-44             | 5425 | 1866(34.4)  | 20.27    | <0.001 | 1146(21.1)  | 149.82   | <0.001 |
| 45-54             | 3759 | 1441(38.3)  |          |        | 1153(30.7)  |          |        |
| 55-64             | 2932 | 1067(36.4)  |          |        | 919(31.3)   |          |        |
| ≥65               | 2502 | 964(38.5)   |          |        | 651(26.0)   |          |        |
| <b>Area</b>       |      |             |          |        |             |          |        |
| Urban             | 7974 | 3163(39.7)  | 75.08    | <0.001 | 1956(24.5)  | 33.85    | <0.001 |
| Rural             | 6644 | 2175(32.7)  |          |        | 1913(28.8)  |          |        |
| <b>Ethnicity</b>  |      |             |          |        |             |          |        |
| Han               | 5757 | 2380(16.28) | 99.09    | <0.001 | 1082(7.40)  | 331.94   | <0.001 |
| Uyghur            | 4767 | 1635(11.18) |          |        | 1361(9.31)  |          |        |
| Kazak             | 4094 | 1323(9.05)  |          |        | 1426(9.76)  |          |        |
| <b>Occupation</b> |      |             |          |        |             |          |        |
| Manual            | 4583 | 1760(12.04) | 12.11    | 0.002  | 1095(7.49)  | 32.08    | <0.001 |
| White collar      | 7751 | 2736(18.72) |          |        | 2086(14.27) |          |        |
| Other             | 2284 | 842(5.76)   |          |        | 688(4.71)   |          |        |
| <b>Education</b>  |      |             |          |        |             |          |        |

|                             |       |             |       |        |             |        |        |
|-----------------------------|-------|-------------|-------|--------|-------------|--------|--------|
| Primary school and below    | 5805  | 1993(13.63) | 26.85 | <0.001 | 1589(10.87) | 21.17  | <0.001 |
| Junior middle school        | 3094  | 1196(8.18)  |       |        | 844(5.77)   |        |        |
| Senior middle school        | 4556  | 1676(11.46) |       |        | 1191(8.15)  |        |        |
| Undergraduate and above     | 1163  | 473(3.24)   |       |        | 245(1.68)   |        |        |
| <b>Marriage</b>             |       |             |       |        |             |        |        |
| Unmarried                   | 192   | 59(0.40)    | 14.11 | <0.001 | 27(0.18)    | 23.05  | <0.001 |
| Married                     | 12988 | 4795(32.80) |       |        | 3427(23.44) |        |        |
| divorced                    | 201   | 53(0.36)    |       |        | 47(0.32)    |        |        |
| widowed                     | 1237  | 431(2.95)   |       |        | 368(2.52)   |        |        |
| <b>Drinking</b>             |       |             |       |        |             |        |        |
| Yes                         | 4169  | 923(6.31)   | 44.48 | <0.001 | 663(4.54)   | 24.58  | <0.001 |
| No                          | 10449 | 4415(30.20) |       |        | 3206(21.93) |        |        |
| <b>Smoking</b>              |       |             |       |        |             |        |        |
| Yes                         | 2151  | 1688(11.55) | 39.71 | <0.001 | 1101(7.53)  | 0.01   | 0.92   |
| No                          | 12467 | 3650(24.97) |       |        | 2768(18.94) |        |        |
| <b>Hypertension</b>         |       |             |       |        |             |        |        |
| Yes                         | 5701  | 2138(14.63) | 3.92  | 0.048  | 2155(14.74) | 616.77 | <0.001 |
| No                          | 8917  | 3200(21.89) |       |        | 1714(11.73) |        |        |
| <b>Diabetes</b>             |       |             |       |        |             |        |        |
| Yes                         | 859   | 335(2.29)   | 2.43  | 0.119  | 317(2.17)   | 51.02  | <0.001 |
| No                          | 13759 | 5003(34.22) |       |        | 3552(24.30) |        |        |
| <b>Dyslipidemia</b>         |       |             |       |        |             |        |        |
| <b>hypertriglyceridemia</b> |       |             |       |        |             |        |        |
| Yes                         | 4113  | 1724(11.79) | 71.97 | <0.001 | 1497(10.24) | 289.94 | <0.001 |
| No                          | 10505 | 3614(24.72) |       |        | 2372(16.23) |        |        |
| <b>hypercholesterolemia</b> |       |             |       |        |             |        |        |
| Yes                         | 3787  | 1469(10.05) | 11.40 | 0.001  | 1267(8.67)  | 128.29 | <0.001 |



|                   |       |             |       |       |             |      |       |
|-------------------|-------|-------------|-------|-------|-------------|------|-------|
| No                | 10831 | 3869(26.47) |       |       | 2602(17.80) |      |       |
| <b>High LDL-C</b> |       |             |       |       |             |      |       |
| Yes               | 5251  | 1921(13.14) | 0.016 | 0.90  | 1334(9.13)  | 4.76 | 0.029 |
| No                | 9367  | 3417(23.38) |       |       | 2535(17.34) |      |       |
| <b>Low HDL-C</b>  |       |             |       |       |             |      |       |
| Yes               | 4437  | 1704(11.66) | 9.79  | 0.002 | 1215(8.31)  | 2.75 | 0.097 |
| No                | 10831 | 3634(24.86) |       |       | 2654(18.16) |      |       |

Categorical variables are presented as counts and percentages. HDL-c, high density lipoprotein-cholesterol; LDL-c, low density lipoprotein-cholesterol.

**Table 2 Prevalence of overweight and obesity in men and women according to age group**

| Age<br>(years) | Overweight |           | <i>P</i> | Obesity   |           | <i>P</i> |
|----------------|------------|-----------|----------|-----------|-----------|----------|
|                | Male(%)    | female(%) |          | male(%)   | female(%) |          |
| 35-44          | 994(40.2)  | 872(29.5) | <0.001   | 631(25.5) | 515(17.4) | <0.001   |
| 45-54          | 735(43.1)  | 706(34.4) |          | 517(30.3) | 636(31.0) |          |
| 55-64          | 476(35.8)  | 591(36.8) |          | 389(29.3) | 531(33.0) |          |
| ≥65            | 530(40.3)  | 434(36.5) |          | 319(24.3) | 332(27.9) |          |

**Table 3 Prevalence of overweight and obesity in Han, Uyghur and Kazak according to age group**

| Age<br>(years) | Overweight |           |           | <i>P</i> | Obesity   |           |           | <i>P</i> |
|----------------|------------|-----------|-----------|----------|-----------|-----------|-----------|----------|
|                | Han(%)     | Uyghur(%) | Kazak(%)  |          | Han(%)    | Uyghur(%) | Kazak(%)  |          |
| 35-44          | 712(35.0)  | 573(34.6) | 581(33.6) | <0.001   | 273(13.4) | 422(25.5) | 451(26.1) | <0.001   |
| 45-54          | 599(43.9)  | 481(38.1) | 361(31.9) |          | 246(18.0) | 436(34.5) | 471(41.6) |          |
| 55-64          | 497(45.9)  | 354(32.6) | 216(28.3) |          | 268(24.7) | 318(29.3) | 333(43.6) |          |
| ≥65            | 572(45.0)  | 227(29.9) | 165(35.1) |          | 295(23.2) | 185(24.3) | 171(36.4) |          |

**Table 4 Multivariate regression analysis of correlates of overweight and obesity in residents of Xinjiang Province**

| Characteristic | B | S.E. | Wald | df | P | OR | 95%CI |
|----------------|---|------|------|----|---|----|-------|
|----------------|---|------|------|----|---|----|-------|

|                          |       |      |        |   |        |      |           |
|--------------------------|-------|------|--------|---|--------|------|-----------|
| <b>Area</b>              | -0.14 | 0.04 | 10.42  | 1 | 0.001  | 0.87 | 0.80-0.95 |
| <b>Sex</b>               | -0.26 | 0.05 | 32.52  | 1 | <0.001 | 0.77 | 0.71-0.84 |
| <b>Ethnic</b>            |       |      | 94.43  | 2 | <0.001 |      |           |
| Han                      | -     | -    | -      | - | -      | 1    | -         |
| Uygur                    | 0.36  | 0.05 | 49.95  | 1 | <0.001 | 1.44 | 1.30-1.59 |
| Kazakh                   | 0.50  | 0.05 | 86.21  | 1 | <0.001 | 1.66 | 1.49-1.84 |
| <b>Age(years)</b>        |       |      | 71.20  | 3 | <0.001 |      |           |
| 35-44                    | -     | -    | -      | - | -      | 1    | -         |
| 45-54                    | 0.38  | 0.05 | 62.79  | 1 | <0.001 | 1.46 | 1.33-1.61 |
| 55-64                    | 0.27  | 0.05 | 24.63  | 1 | <0.001 | 1.31 | 1.18-1.46 |
| ≥65                      | 0.11  | 0.06 | 3.05   | 1 | 0.081  | 1.11 | 0.99-1.26 |
| <b>Education</b>         |       |      | 17.87  | 3 | <0.001 |      |           |
| Primary school and below | -     | -    | -      | - | -      | 1    | -         |
| Junior middle school     | 0.20  | 0.05 | 15.61  | 1 | <0.001 | 1.22 | 1.11-1.35 |
| Senior middle school     | 0.15  | 0.06 | 7.02   | 1 | 0.008  | 1.16 | 1.04-1.29 |
| Undergraduate and above  | 0.22  | 0.08 | 6.84   | 1 | 0.009  | 1.25 | 1.06-1.47 |
| <b>Occupation</b>        |       |      | 10.36  | 2 | 0.006  |      |           |
| Manual                   | -     | -    | -      | - | -      | 1    | -         |
| White collar             | 0.01  | 0.05 | 0.04   | 1 | 0.833  | 1.01 | 0.91-1.12 |
| Other                    | 0.18  | 0.06 | 7.90   | 1 | 0.005  | 1.20 | 1.06-1.36 |
| <b>Marriage</b>          |       |      | 26.50  | 3 | <0.001 |      |           |
| Unmarried                | -     | -    | -      | - | -      | 1    | -         |
| Married                  | 0.60  | 0.15 | 15.54  | 1 | <0.001 | 1.83 | 1.36-2.47 |
| Divorced                 | 0.10  | 0.21 | 0.20   | 1 | 0.656  | 1.10 | 0.72-1.67 |
| widowed                  | 0.59  | 0.17 | 12.44  | 1 | <0.001 | 1.81 | 1.30-2.51 |
| <b>Smoking</b>           | -0.15 | 0.05 | 8.95   | 1 | 0.003  | 0.86 | 0.78-0.95 |
| <b>Drinking</b>          | 0.37  | 0.06 | 34.83  | 1 | <0.001 | 1.45 | 1.28-1.64 |
| <b>Hypertension</b>      | 0.76  | 0.04 | 340.43 | 1 | <0.001 | 2.14 | 1.97-2.32 |
| <b>Diabetes</b>          | 0.28  | 0.09 | 10.41  | 1 | 0.001  | 1.32 | 1.12-1.57 |

**Dyslipidemia**

|                      |       |       |        |   |        |       |           |
|----------------------|-------|-------|--------|---|--------|-------|-----------|
| hypertriglyceridemia | 0.89  | 0.05  | 371.44 | 1 | <0.001 | 2.43  | 2.22-2.66 |
| hypercholesterolemia | 0.21  | 0.05  | 20.94  | 1 | <0.001 | 1.23  | 1.13-1.34 |
| Low HDL-C            | 0.10  | 0.04  | 6.44   | 1 | 0.011  | 1.11  | 1.02-1.20 |
| High LDL-C           | 0.015 | 0.038 | 0.156  | 1 | 0.693  | 1.015 | 0.94-1.09 |
| <b>Constant</b>      | -1.01 | 0.17  | 35.28  | 1 | <0.001 | -     | -         |

---

For peer review only

# BMJ Open

## Prevalence of overweight and obesity and associated risk factors among adult residents of northwest China: A cross-sectional study

|                                 |                                                                                                                                                                                                                                                                                                                                                                                                                                                                                                                                                                                                                                                                                                                                                                                                                                                                                                                                                                                                                                                                                                                                                                                                                                                                                                                                                                                                                                                                                                                                                                                                                                                         |
|---------------------------------|---------------------------------------------------------------------------------------------------------------------------------------------------------------------------------------------------------------------------------------------------------------------------------------------------------------------------------------------------------------------------------------------------------------------------------------------------------------------------------------------------------------------------------------------------------------------------------------------------------------------------------------------------------------------------------------------------------------------------------------------------------------------------------------------------------------------------------------------------------------------------------------------------------------------------------------------------------------------------------------------------------------------------------------------------------------------------------------------------------------------------------------------------------------------------------------------------------------------------------------------------------------------------------------------------------------------------------------------------------------------------------------------------------------------------------------------------------------------------------------------------------------------------------------------------------------------------------------------------------------------------------------------------------|
| Journal:                        | <i>BMJ Open</i>                                                                                                                                                                                                                                                                                                                                                                                                                                                                                                                                                                                                                                                                                                                                                                                                                                                                                                                                                                                                                                                                                                                                                                                                                                                                                                                                                                                                                                                                                                                                                                                                                                         |
| Manuscript ID                   | bmjopen-2018-028131.R1                                                                                                                                                                                                                                                                                                                                                                                                                                                                                                                                                                                                                                                                                                                                                                                                                                                                                                                                                                                                                                                                                                                                                                                                                                                                                                                                                                                                                                                                                                                                                                                                                                  |
| Article Type:                   | Research                                                                                                                                                                                                                                                                                                                                                                                                                                                                                                                                                                                                                                                                                                                                                                                                                                                                                                                                                                                                                                                                                                                                                                                                                                                                                                                                                                                                                                                                                                                                                                                                                                                |
| Date Submitted by the Author:   | 13-Jun-2019                                                                                                                                                                                                                                                                                                                                                                                                                                                                                                                                                                                                                                                                                                                                                                                                                                                                                                                                                                                                                                                                                                                                                                                                                                                                                                                                                                                                                                                                                                                                                                                                                                             |
| Complete List of Authors:       | <p>Song, Ning; Xinjiang Medical University Affiliated First Hospital, Department of Cardiology; Xinjiang Key Laboratory of Cardiovascular Disease Research</p> <p>Fen, Liu; Xinjiang Medical University Affiliated First Hospital, Department of Cardiology; Xinjiang Key Laboratory of Cardiovascular Disease Research</p> <p>Han, Min; Xinjiang Medical University Affiliated First Hospital, Department of Cardiology; Xinjiang Key Laboratory of Cardiovascular Disease Research</p> <p>Zhao, Qiang; Xinjiang Medical University Affiliated First Hospital, Department of Cardiology; Xinjiang Key Laboratory of Cardiovascular Disease Research</p> <p>Zhao, Qian; Xinjiang Medical University Affiliated First Hospital, Department of Cardiology; Xinjiang Key Laboratory of Cardiovascular Disease Research</p> <p>Zhai, Hui; Xinjiang Medical University Affiliated First Hospital, Department of Cardiology; Xinjiang Key Laboratory of Cardiovascular Disease Research</p> <p>Li, Xiangmei; Xinjiang Medical University Affiliated First Hospital, Department of Cardiology; Xinjiang Key Laboratory of Cardiovascular Disease Research</p> <p>Du, Guoli; Xinjiang Medical University Affiliated First Hospital, Department of Cardiology; Xinjiang Key Laboratory of Cardiovascular Disease Research</p> <p>Li, Xiao-Mei; Xinjiang Medical University Affiliated First Hospital, Department of Cardiology; Xinjiang Key Laboratory of Cardiovascular Disease Research</p> <p>Yang, Yi-Ning; Xinjiang Medical University Affiliated First Hospital, Department of Cardiology; Xinjiang Key Laboratory of Cardiovascular Disease Research</p> |
| <b>Primary Subject Heading</b>: | Public health                                                                                                                                                                                                                                                                                                                                                                                                                                                                                                                                                                                                                                                                                                                                                                                                                                                                                                                                                                                                                                                                                                                                                                                                                                                                                                                                                                                                                                                                                                                                                                                                                                           |
| Secondary Subject Heading:      | Cardiovascular medicine, Epidemiology, Ethics, Global health                                                                                                                                                                                                                                                                                                                                                                                                                                                                                                                                                                                                                                                                                                                                                                                                                                                                                                                                                                                                                                                                                                                                                                                                                                                                                                                                                                                                                                                                                                                                                                                            |
| Keywords:                       | cross-sectional survey, overweight, obesity, risk factors                                                                                                                                                                                                                                                                                                                                                                                                                                                                                                                                                                                                                                                                                                                                                                                                                                                                                                                                                                                                                                                                                                                                                                                                                                                                                                                                                                                                                                                                                                                                                                                               |
|                                 |                                                                                                                                                                                                                                                                                                                                                                                                                                                                                                                                                                                                                                                                                                                                                                                                                                                                                                                                                                                                                                                                                                                                                                                                                                                                                                                                                                                                                                                                                                                                                                                                                                                         |

1  
2  
3  
4  
5  
6  
7  
8  
9  
10  
11  
12  
13  
14  
15  
16  
17  
18  
19  
20  
21  
22  
23  
24  
25  
26  
27  
28  
29  
30  
31  
32  
33  
34  
35  
36  
37  
38  
39  
40  
41  
42  
43  
44  
45  
46  
47  
48  
49  
50  
51  
52  
53  
54  
55  
56  
57  
58  
59  
60

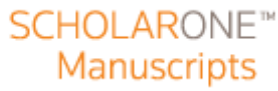

1  
2  
3  
4 **1 Prevalence of overweight and obesity and associated risk factors among adult residents of**  
5  
6 **2 northwest China: A cross- sectional study**  
7

8 3 Ning Song<sup>1,2+</sup>, Fen Liu<sup>1,2+</sup>, Min Han<sup>1,2</sup>, Qiang Zhao<sup>1,2</sup>, Qian Zhao<sup>1,2</sup>, Hui Zhai<sup>1,2</sup>, Xiangmei Li<sup>1,2</sup>,  
9  
10 4 Guoli Du<sup>1,2</sup>, Xiaomei Li<sup>1,2,\*</sup>, and Yining Yang<sup>1,2,\*</sup>  
11  
12

13 5 1 Department of Cardiology, First Affiliated Hospital, Xinjiang Medical University, Urumqi, China;  
14

15 6 2 Xinjiang Key Laboratory of Cardiovascular Disease Research, Urumqi, China.  
16  
17

18 7 + These authors have contributed equally to this work.  
19

20  
21 **8 \*Corresponding Author**  
22

23 9 Full name: Xiao-Mei Li  
24

25 10 Institute: Xinjiang Key Laboratory of Cardiovascular Disease Research, Urumqi, China.  
26  
27

28 11 Department: Department of Cardiology, The First Affiliated Hospital of Xinjiang Medical  
29  
30  
31 12 University.  
32

33 13 Street Name & Number: 137 Liyushan South Road, Urumqi, 830054, China.  
34  
35

36 14 Telephone: 18690897592 Fax number: 0991-4362611 e-mail: [lixm505@163.com](mailto:lixm505@163.com).  
37  
38

39 15 Full name: Yi-Ning Yang  
40

41 16 Institute: Xinjiang Key Laboratory of Cardiovascular Disease Research, Urumqi, China.  
42  
43

44 17 Department: Department of Cardiology, The First Affiliated Hospital of Xinjiang Medical  
45  
46  
47 18 University.  
48

49 19 Street Name & Number: 137 Liyushan South Road, Urumqi, 830054, China.  
50  
51

52 20 Tel: 86-991-4361690 Fax: 86-991-4365330 E-mail: [yangyn5126@163.com](mailto:yangyn5126@163.com).  
53  
54

55 21  
56

57  
58 22  
59  
60

1  
2  
3  
4 1  
5  
6  
7 2  
8  
9

10

**3 Abstract**

4 **Objective:** Overweight and obesity have been shown to be related to multiple chronic conditions  
5 and lead to a heavy economic burden on society throughout the world. This study aims to estimate  
6 the prevalence of overweight and obesity and determine potential influencing factors among adults  
7 in Xinjiang, northwest China.

8 **Design:** A community-based observational study.

9 **Setting:** The First Affiliated Hospital of Xinjiang Medical University.

10 **Methods:** In total, 14,618 adult participants (7,799 males; 6,819 females), aged over 35 years old,  
11 were recruited from the Cardiovascular Risk Survey conducted in 2010. Data were obtained from  
12 face-to-face interview and physical examination. The sample was used to estimate the prevalence  
13 of overweight (body mass index (BMI) [24-28] kg/m<sup>2</sup>) and obesity (BMI≥28 kg/m<sup>2</sup>) in Xinjiang  
14 Province, and the influencing factors were analyzed based on statistical methods.

15 **Results:** The overall prevalence of overweight was 36.5% (male 40.1%; female 33.4%), and the  
16 prevalence of obesity was 26.5% (male 27.2%; female 25.8%) in Xinjiang Province. The  
17 prevalence of both overweight and obesity were higher in women than men ( $P<0.001$ ). The main  
18 influencing factors for overweight and obesity are sex, age, race, marriage status, education level,  
19 occupation, smoking, drinking, hypertension, diabetes and dyslipidemia ( $P<0.05$ ).

20 **Conclusions:** This study estimated that the prevalence of overweight and obesity among adult  
21 residents of Xinjiang Province, northwest China, was high. These data suggest that efforts toward  
22 prevention and control of overweight and obesity should be a public health priority in the  
23 northwest of China.

24 **Keywords:** cross-sectional survey, overweight, obesity, risk factors

**25 Strengths and limitations of this study**

- 26 ➤ The survey sample was demographically representative of Uygur adults with obesity aged  
27 35–80 years in Xinjiang.  
28 ➤ The main strengths of our study are its large sample size and precise physical measurements,

1 which increase the validity of our results.

2 ➤ Due to the cross-sectional nature and self-designed questionnaire, indicators and experience  
3 could have been affected by bias.

4 ➤ Moreover, other indicators of adiposity, such as body fat percentage and waist circumference  
5 were not obtained in our study.

6 ➤ The results were from Xinjiang only and therefore cannot be generalised to the whole China.

7

## 8 **Introduction**

9 Obesity is a complex chronic global disease affecting people worldwide across all ages, sexes,  
10 ethnicities, and nationalities, which is the fifth leading cause of mortality globally <sup>1 2</sup>. According to  
11 the World Health Organization (WHO), the prevalence of worldwide obesity has doubled in more  
12 than 70 countries since 1980 <sup>3</sup>; this trend has continuously increased in most other countries. In 2013,  
13 in order to make physicians pay more attention to the condition, the American Medical Association  
14 classified obesity as a disease <sup>4</sup>.

15 Body mass index (BMI), which is calculated as weight/height squared ( $\text{kg}/\text{m}^2$ ), is a common  
16 and accepted measure that is used to report obesity rates. While BMI is not a true measure of  
17 adiposity, it is simple to use in health screenings and epidemiological surveys <sup>5</sup>. According to the  
18 WHO, obesity is defined as a  $\text{BMI} \geq 30 \text{ kg}/\text{m}^2$ , and overweight as a BMI of  $[25-30) \text{ kg}/\text{m}^2$  <sup>6</sup>. For  
19 Chinese people, a  $\text{BMI} \geq 28 \text{ kg}/\text{m}^2$  suggests obesity and a BMI of  $[24-28) \text{ kg}/\text{m}^2$  indicates  
20 overweight <sup>7</sup>.

21 China is the largest developing country and has the largest population in the world. With the  
22 rapid economic growth and changes in lifestyle such as dietary habits and physical activity <sup>8</sup>, the  
23 epidemiological data indicated that individuals with overweight and obesity had a higher prevalence  
24 of traditional diseases including dyslipidemia, hypertension, cardiovascular disease, insulin  
25 resistance or diabetes, fatty liver disease, and psychosocial complications and some cancers <sup>5 9</sup>.  
26 Located in the northwest China, Xinjiang not only is an autonomous minority ethnic region of the  
27 People's Republic of China, but also is one of the developing regions in China. It is the largest  
28 Chinese administrative division and spans over 1.66 million  $\text{km}^2$  which takes up about one sixth of  
29 the country's territory. A few of studies had reported the prevalence of overweight among adults in



1  
2  
3  
4 1 Xinjiang <sup>10</sup>. Nevertheless, the samples in above mentioned studies were small, those results cannot  
5  
6 2 represent accurately the status of overweight and obesity in the whole region of Xinjiang.

7  
8 3 In the present study, we estimated the prevalence of overweight and obesity in Xinjiang.  
9  
10 4 Meanwhile, the potential influencing factors in adult residents of northwest China were explored.  
11  
12 5 The results of this study will be considered as a reference for policy makers in making informed  
13  
14 6 decisions.

## 15 7 **Materials and Methods**

### 16 8 **Ethics approval**

17  
18  
19 9 This study was conducted according to the standards of the Declaration of Helsinki. Written  
20  
21 10 informed consent was acquired from each participant prior to enrollment. Ethics approval was from  
22  
23 11 the Ethics Committee of the First Affiliated Hospital of Xinjiang Medical University (the approval  
24  
25 12 ID: 20100116-01).

### 26 13 **Study design and population**

27  
28  
29 14 This population-based cross-sectional survey is part of the Project on Present Situation and the  
30  
31 15 Cardiovascular Risk Survey (CRS) study in Xinjiang Province of China in 2010. The CRS was a  
32  
33 16 prospective, multiple ethnicity and community-based observational study designed to investigate  
34  
35 17 the prevalence and risk factors for cardiovascular disease (CVD) in the Han, Uygur and Kazakh  
36  
37 18 populations in Xinjiang Province <sup>11</sup>. All the subjects included had lived in Xinjiang Province for  
38  
39 19 more than 1 year. Briefly, the CRS consisted of 16,460 adults aged  $\geq 35$  years old, of whom 14,618  
40  
41 20 subjects (5,757 Han, 4,767 Uygur and 4,094 Kazakh Chinese) completed the survey, yielding a  
42  
43 21 response rate of 88.8%. We used a multistage stratified sampling method to select the study sample  
44  
45 22 from 6 different administrative regions including Urumqi, Yili, Hetian, Kelamayi, Fukang, and  
46  
47 23 Turpan. Finally, each participant was selected randomly from each household in the sites mentioned  
48  
49 24 above.

### 50 25 **Data collection**

51  
52 26 The formal survey was made up of two parts: face-to-face interview and physical examination.  
53  
54 27 Before the formal survey, we conducted a pre-survey to explore the feasibility of the questionnaire.  
55  
56 28 During the investigation, each completed questionnaire was examined by two investigators to ensure  
57  
58 29 validity and consistency. After the fieldwork, data were manipulated by parallel double entry, and  
59  
60

1 we also performed three verifications to check for incomplete and inconsistent responses. The  
2 questionnaire provided demographics, general personal information and medical histories<sup>12</sup>. Height  
3 and weight were measured using a standard protocol. Height was measured to the nearest 0.1 cm,  
4 and weight was measured with a standard scale in the upright position to the nearest 0.1 kg. Smoking  
5 and drinking conditions were self-reported.

6 Blood samples collection was conducted in examination centers at local hospital in the  
7 participants' residential area. At the time of the in-person interview, a 5mL of venous blood was  
8 collected into EDTA tubes and processed to obtain plasma within 4h. All samples were stored at  
9 -80°C immediately after processing. We measured the concentration of fasting glucose using  
10 equipment for chemical analysis (Dimension AR/AVL Clinical Chemistry System, Newark, NJ,  
11 USA) employed by the Clinical Laboratory Department of the First Affiliated Hospital of Xinjiang  
12 Medical University. Biochemical markers in plasma including total cholesterol (TC), triglycerides  
13 (TG), high-density lipoprotein cholesterol (HDL-C) and low-density lipoprotein cholesterol (LDL-  
14 C) were measured.

### 15 **Definition of variables**

16 Overweight and obesity were defined by Chinese standards mentioned above. Obesity was  
17 defined as  $BMI \geq 28 \text{ kg/m}^2$ , and overweight was defined as a BMI of [24-28)  $\text{kg/m}^2$ .

18 Education was classified into four levels: Primary school and below (including never attended  
19 school and elementary schooling only); Junior middle school; Senior middle school (including  
20 secondary vocational schooling); undergraduate and above (including post-secondary vocational  
21 schooling, master's degree and doctoral degree). Manual labor included farmers, production and  
22 service workers. White collar occupations included office and other technical employment. Other  
23 occupations included unemployed, retiree, student and full-time housewife<sup>13</sup>. Smoking status  
24 classifications were current smokers (which had smoked at least one cigarette a day over the past  
25 30 days), and never-smokers. Drinking status classifications were current drinkers (which had  
26 consumed more than one alcoholic drink a week), and never-drinkers. Hypertension was defined as  
27 mean systolic  $BP \geq 140 \text{ mmHg}$ , and/or mean diastolic  $BP \geq 90 \text{ mmHg}$ , and/or current use of  
28 antihypertensive medications<sup>14</sup>. Diabetes was defined as fasting plasma glucose  $\geq 126 \text{ mg/dL}$  ( $\geq 7.0$   
29  $\text{mmol/L}$ ) and/or self-reported history of diabetes and/or current use of insulin or antidiabetic

1 medications<sup>15</sup>. Hypercholesterolemia was defined as serum total cholesterol level >6.22 mmol/L  
2 (240 mg/dL), and hypertriglyceridemia was defined as serum triglyceride level >2.26 mmol/L (200  
3 mg/dL). A serum LDL-C level of >4.14 mmol/L (160 mg/dL) was defined as high LDL-C, and a  
4 serum HDL-C level of <1.04 mmol/L (40 mg/dL) was defined as low HDL-C. In total, dyslipidemia  
5 was defined as the existence of at least one of the four abnormal lipid concentrations mentioned  
6 above, or self-reported use of lipid-lowering drugs<sup>16</sup>.

### 7 **Statistical analysis**

8 Data was verified and corrected using EpiData 3.02 software (EpiData, Association, Odense,  
9 Denmark) by 2 staff members. Frequency distribution was used to present characteristics of the  
10 subjects, and data presented as percentages were used to report the prevalence ratio. Continuous  
11 variables were expressed as mean±standard deviation (SD) and numerical data were expressed as  
12 rates, and a Chi-square test ( $\chi^2$ ) was used to compare the prevalence of overweight and obesity in  
13 different groups.

14 To analyze the factors for obesity and adjust for potential confounding effects, a multivariable  
15 logistic regression analyses were carried out to explore independent factors associated with  
16 overweight and obesity. OR with 95% CI was used for the risk analysis. All statistical analyses were  
17 conducted using the complex sampling function of Social Sciences SPSS for Windows version 22.0  
18 (SPSS, Inc, Chicago, IL, USA), and a  $P<0.05$  level of significance was selected.

### 19 **Patient and public involvement**

20 This population-based cross-sectional survey is part of the Project on Present Situation and  
21 the Cardiovascular Risk Survey (CRS) study in Xinjiang Province of China in 2010. The study  
22 was designed to investigate the prevalence of overweight and obesity among adult residents in  
23 Xinjiang, the northwest China. However, no patients or members of the public were included in  
24 the design, recruitment or conduct of the study. The results of measurements would be  
25 disseminated to participants after the study which was completed by the study team. The burden of  
26 the intervention will not be assessed by patients themselves.

### 27 **Results**

28 In this survey, we interviewed 14618 residents aged 35 to 101 years (mean age: 50.8±12.6  
29 years), comprised of 6,819 (46.6%) men and 7,799 (53.4%) women. Among these participants,

1  
2  
3  
4 1 5,757 (39.4%) were Han ethnicities with a mean age of 52.5±12.7 years, 4,767 (32.6%) were Uygur  
5  
6 2 ethnicities with a mean age of 50.7±13.0 years, and 4,094 (28.0%) were Kazakh ethnicities with a  
7  
8 3 mean age of 48.6±11.7 years. According to the BMI classification for Chinese people, the overall  
9  
10 4 prevalence of overweight was 36.5% (male 40.1%; female 33.4%), and the prevalence of obesity  
11  
12 5 was 26.5% (male 27.2%; female 25.8%) in Xinjiang Province (**Table 1**). There were differences in  
13  
14 6 age, area, race, occupation, education, marriage, drinking, hypertension history and plasma levels  
15  
16 7 of TG, TC among the overweight and obesity groups, while there was no significant difference in  
17  
18 8 sex, smoking, diabetes history and the level of LDL-c and HDL-C among the 2 groups.

19  
20 9 From the age-stratified and gender-stratified results in **Table 2**, for men, the prevalence of both  
21  
22 10 overweight and obesity all peaked at 45-54 years, while no significant trend was illustrated in the  
23  
24 11 prevalence of overweight increased with age. For women, the prevalence of overweight and obesity  
25  
26 12 increased with age, peaking at 55-64 years, though there has a slight decrease at ≥65 years. In  
27  
28 13 addition, a higher proportion of enrolled males were overweight than females. Interestingly, the  
29  
30 14 proportions of females who were obese were higher than those of males.

31  
32 15 From the age-stratified and race-stratified results in **Table 3**, as a whole, obesity prevalence in  
33  
34 16 the different ethnicities was found to be the highest in Kazakh and the lowest in Han participants,  
35  
36 17 and there was a statistical significance among the three ethnic groups ( $P<0.001$ ). Further,  
37  
38 18 overweight prevalence also showed an interesting significant difference among the three ethnicities,  
39  
40 19 the highest in Han and the lowest in Kazakh participants.

41  
42 20 We divided the participants into two groups: normal weight; overweight and obese. **Table 1**  
43  
44 21 has shown that the following factors all had a significant effect: age, area, race, education, marriage  
45  
46 22 status, occupation, drinking, hypertension and dyslipidemia ( $P<0.05$ ). We applied multivariable  
47  
48 23 unconditional logistic regression analysis model on all identified risk factors and attempted to  
49  
50 24 identify any existing difference in these risk factors which may explain the difference in overweight  
51  
52 25 and obesity prevalence. **Table 4** shows the results of logistic regression models comparing the  
53  
54 26 prevalence of the potential risk factors: sex, age, area, marriage status, occupation, smoking,  
55  
56 27 drinking, hypertension, diabetes and the level of dyslipidemia, including hypercholesterolemia,  
57  
58 28 hypertriglyceridemia and low HDL-C. The multivariable logistic regression results reveal that  
59  
60 29 female adults prefer to become overweight and obese than male adults (OR 0.8, 95% CI 0.7 to 0.8).

1 We categorized age into four groups, which clearly showed that increasing age is a risk factor for  
2 overweight/obesity, especially age 45-54 years (OR 1.5, 95% CI 1.3 to 1.6). Among the three races,  
3 Kazak population (OR 1.7, 95% CI 1.5 to 1.8) and Uygur population (OR 1.4, 95% CI 1.3 to 1.6)  
4 carried higher risk to become overweight and obese. Participants who have married (OR 1.8, 95%  
5 CI 1.4 to 2.5) or widowed (OR 1.8, 95% CI 1.3 to 2.5) are more likely to be overweight/obese than  
6 those who have unmarried. In addition, smokers (OR 0.9, 95% CI 0.8 to 0.9) are less likely to  
7 become overweight and obese than nonsmokers. Participants who drink are easier to become  
8 overweight or obese than those who never or rarely drink (OR 1.5, 95% CI 1.3 to 1.6). Overweight  
9 and obesity are more common among those who had hypertension (OR 2.1, 95% CI 2.0 to 2.3) and  
10 diabetes (OR 1.3, 95% CI 1.1 to 1.6) compared with those who had no hypertension and diabetes  
11 history. In the overweight and obese population, hypertriglyceridemia (OR 2.4, 95% CI 2.2 to 2.7),  
12 hypercholesterolemia (OR 1.2, 95% CI 1.1 to 1.3) and low HDL-C (OR 1.1, 95% CI 1.0 to 1.2)  
13 remained as risk factors.

#### 14 **Discussion**

15 The epidemic of obesity is one of the most important health problems worldwide and is  
16 estimated to be the second leading cause of preventable death in developed countries, behind  
17 cigarette smoking<sup>17 18</sup>. The prevalence of overweight and obesity continues to increase around the  
18 world, as have associated comorbidities and healthcare costs<sup>19</sup>. In the US, the prevalence of obesity  
19 accounts for one-third of the general population, and another one-third is overweight<sup>20</sup>. Data from  
20 the China Chronic Disease Survey conducted by the Chinese Center for Disease Control and  
21 Prevention demonstrated that the prevalence of overweight among Chinese adults (age 18–64 years)  
22 for 2007 and 2010 was 26.6% and 30.6%, respectively (male 27.4% and 32.1%; female 25.7% and  
23 29.1%), and the prevalence of obesity was 7.7% and 12.1%, respectively (male 6.7% and 12.5%;  
24 female 8.7% and 11.1%)<sup>21</sup>. No doubt, we found that the prevalence of both overweight and obesity  
25 was high. Our cross-sectional study indicates that the prevalence of overweight and obesity among  
26 adults in northwest China was 36.5% (male 40.1%; female 33.4%), and 26.5% (male 27.2%; female  
27 25.8%). In the Russian population<sup>22</sup>, the overweight was 64.6% (male 42.3%; female 28.7%), and  
28 approximately a third of the participants (30.3%) had obesity (male 27.5%; female 31.4%). Contrary  
29 to what was observed in our research, the prevalence of overweight was higher than obesity. This

1  
2  
3  
4 1 implies that overweight and obesity have a higher prevalence in both sexes and are more common  
5  
6 2 in northwest China and Russian than in other areas, although effective actions might have been  
7  
8 3 taken to control the upward trend <sup>23</sup>.

9  
10 4 In this study, we found that the prevalence of both overweight and obesity is high in middle  
11  
12 5 age (45-64 years). Similarly, age gradients in the prevalence of obesity are found in Russia <sup>22</sup>. It is  
13  
14 6 worth noting that more than half of all women aged 55–64 years have obesity, and nearly 80% men  
15  
16 7 in the groups aged 45–54 years had overweight and obesity, which consists with our age gradients.  
17  
18 8 Chinese people are more likely to have positive perceptions of obesity because it is considered good  
19  
20 9 fortune to become fat during middle age in traditional Chinese culture <sup>24</sup>. Moreover, a large segment  
21  
22 10 of the middle-aged and older adult population will be living with overweight and obesity, which is  
23  
24 11 associated with additional health impairments <sup>25</sup>.

25  
26 12 Through the present study, we found a very high prevalence of overweight and obesity in three  
27  
28 13 ethnicities in Xinjiang, and there is no doubt that the result is similar to the previous study in  
29  
30 14 Xinjiang <sup>10</sup>. In addition, the prevalence rate of obesity was significantly different among Han, Uygur  
31  
32 15 and Kazak groups and the prevalence in Kazak group was significantly higher compared with Han  
33  
34 16 and Uygur. Overall, our findings indicate that 16.3% of Han, 11.2% of Uygur, and 9.1% of Kazak  
35  
36 17 people more than 35 years of age in Xinjiang have overweight, as with 7.4% of Han, 9.3% of Uygur,  
37  
38 18 and 9.8% of Kazak people have obesity. Xinjiang is a multi-ethnic co-populated area in China. The  
39  
40 19 national census showed that there are 47 ethnicities in Xinjiang, and 13 of them are confirmed to be  
41  
42 20 native ethnicities, such as the Uygur and Kazak. The explanations for this increase of prevalence as  
43  
44 21 follows: firstly, Kazak live in the grassland and forests, whose dietary habits were characterized by  
45  
46 22 eating more animal and consuming fewer fresh vegetables; Secondly, Kazak is a nomadic ethnic  
47  
48 23 who usually lives in hypoxia area and high altitude where the climate is cold and dry; Thirdly,  
49  
50 24 different genetic backgrounds may also be an important factor underlying the different prevalence  
51  
52 25 of obesity <sup>26</sup>.

53  
54 26 Multivariable logistic regression analysis suggested that several factors are associated with the  
55  
56 27 prevalence of overweight and obesity. A previous review revealed that various marital transitions  
57  
58 28 are related with changes in body weight: transition into marriage appears to be associated with  
59  
60 29 weight gain, whereas transition out of marriage is associated with weight loss <sup>27</sup>. Our study found a

1  
2  
3  
4 1 similar result that, transition into marriage including married, divorce and widowed are risk factors  
5  
6 2 for becoming overweight and obese. Plausible explanations are behaviors and lifestyle which differ  
7  
8 3 among married individuals, however, the exact mechanism is not clear to illustrate this apparent  
9  
10 4 association with marriage status. In our study, it is also found that different educational levels,  
11  
12 5 occupations and area of residence are closely related to body weight. We have observed that low  
13  
14 6 education level is a risk factor because of insufficient level of cognition. Urban population,  
15  
16 7 especially unemployed, retiree, student and full-time housewife, are easier to become overweight  
17  
18 8 and obese, which contribute to urban working conditions, for example sitting in the office, fast-  
19  
20 9 paced life and supermarket or fast food restaurant availability <sup>28</sup>.

21  
22 10 The 2015 Global Burden of Disease Study, representing 195 countries and territories, estimated  
23  
24 11 that 25.0% of men and 5.4% of women worldwide smoked daily, which is the leading preventable  
25  
26 12 cause of death worldwide <sup>29</sup>. In this study, we found a lower prevalence of overweight and obesity  
27  
28 13 in smokers than non-smokers, which is consistent with studies conducted in Switzerland, India and  
29  
30 14 Jilin, China <sup>21 30 31</sup>. In addition, reasonable explanations to illustrated the issue according to two  
31  
32 15 different criteria. In terms of tobacco use, using tobacco is connected with multiple system functions,  
33  
34 16 especially cardiovascular and digestive systems <sup>32</sup>. In terms of the organism itself, smoking has been  
35  
36 17 considered as methods of pressure and energy relief. Affected by the traditional culture of drinking  
37  
38 18 alcohol, especially in northwest China, it is generally believed that, the more you drink, the more  
39  
40 19 weight you get. Wang et al <sup>21</sup> showed the consisted results.

41  
42 20 To the best of our knowledge, obesity is an independent risk factor both of CVD and death <sup>33-</sup>  
43  
44 21 <sup>35</sup>. We explore that the prevalence of overweight and obesity are higher if subjects are with  
45  
46 22 hypertension or diabetes or dyslipidemia. The results provide a compelling reason why the  
47  
48 23 occurrence of obesity is combined with cardiovascular risk factors such as hypertension, diabetes  
49  
50 24 or dyslipidemia. Previous studies reported that the benefits of weight loss are well established,  
51  
52 25 with a 5–10% reduction in weight associated with improvement in health and quality of life, and a  
53  
54 26 3% reduction being positive for health improvement where it is maintained <sup>36</sup>.

55  
56 27 These departments should heed the high prevalence of overweight and obesity in Xinjiang  
57  
58 28 Province and provide effective guidelines to help to reverse the trend. The main strengths of our  
59  
60 29 study are its large sample size and precise physical measurements, which increase the validity of



1 our results. However, the present study has several limitations. First, the main limitation is the  
2 cross-sectional design which prohibits inferring a causal link between overweight and obesity and  
3 risk factors. As in cross-sectional studies data on exposure and outcome are gathered  
4 simultaneously in a specific time point, prospective studies are necessary to confirm our findings.  
5 In addition, self-reported data and the nature of cross-sectional data may lead to recall and  
6 reporting biases, which may be the reason for the insignificant difference in the effect of obesity  
7 on reasons. Finally, other indicators of adiposity, such as body fat percentage and waist  
8 circumference which plenty of studies reported to reflect the prevalence of overweight and obesity  
9 and body fat distribution, were not obtained in our study<sup>37 38</sup>.

## 10 **Conclusions**

11 In conclusion, the present study indicates that the prevalence of overweight and obesity  
12 among adult residents in Xinjiang, the northwest China, is very high during the past years.  
13 Furthermore, the main influencing factors for overweight and obesity are sex, age, race, marriage  
14 status, education level, occupation, smoking, drinking, hypertension, diabetes and dyslipidemia.  
15 These data suggest that efforts toward prevention and control of overweight and obesity should be  
16 a public health priority in the northwest of China, which will be submitted to relevant departments  
17 as a reference to reverse the trends.

18 **Funding:** This study was supported by grants from Xinjiang Science and Technology Support  
19 Project (2016E02072), the Natural Science Foundation of China (81460069, 81660058), and the  
20 Major Disease Medical Key Laboratory Open Subject of Xinjiang in China (SKLIB-XJMDR-  
21 2016-Y4).

22 **Acknowledgments:** We thank the Project on Present Situation and the Cardiovascular Risk  
23 Survey (CRS) study in Xinjiang Province of China for providing necessary data.

24 **Contributors:** Conceived and designed the experiments: Yi-Ning Yang, Xiao-Mei Li. Performed  
25 the experiments: Ning Song, Fen Liu. Analyzed the data: Min Han, Qiang Zhao, Qian Zhao.  
26 Contributed reagents/materials/analysis tools: Xiang-Mei Li, Guo-Li Du, Hui Zhai. Quality control  
27 the study and revision: Yi-Ning Yang, Xiao-Mei Li. Wrote the paper: Ning Song. All authors read  
28 and approved the final manuscript.

29 **Conflicts of Interest:** The authors declare no conflict of interest.



1  
2  
3  
4 1 **Ethics approval:** This study was carried out in accordance with the Declaration of Helsinki and the  
5  
6 2 study protocol was approved by the Ethics Committee of the First Affiliated Hospital of Xinjiang  
7  
8 3 Medical University (Xinjiang, China) (approval ID:20100116-01).

9  
10 4 **Data sharing statement:** All data relevant to the study are included in the article. No additional  
11  
12 5 data are available.

## 13 6 **References**

- 15 7 1. De Luca M, Angrisani L, Himpens J, et al. Indications for Surgery for Obesity and Weight-  
16 8 Related Diseases: Position Statements from the International Federation for the Surgery of Obesity  
17 9 and Metabolic Disorders (IFSO). *Obesity surgery* 2016;26(8):1659-96 doi: 10.1007/s11695-016-  
18 10 2271-4[published Online First: Epub Date]].
- 11 2. Collaboration NCDRF. Trends in adult body-mass index in 200 countries from 1975 to 2014: a  
12 12 pooled analysis of 1698 population-based measurement studies with 19.2 million participants.  
13 13 *Lancet* 2016;387(10026):1377-96 doi: 10.1016/S0140-6736(16)30054-X[published Online First:  
14 14 Epub Date]].
- 15 3. Pineda E, Sanchez-Romero LM, Brown M, et al. Forecasting Future Trends in Obesity across  
16 16 Europe: The Value of Improving Surveillance. *Obesity facts* 2018;11(5):360-71 doi:  
17 17 10.1159/000492115[published Online First: Epub Date]].
- 18 4. Addo PN, Nyarko KM, Sackey SO, et al. Prevalence of obesity and overweight and associated  
19 19 factors among financial institution workers in Accra Metropolis, Ghana: a cross sectional study.  
20 20 *BMC research notes* 2015;8:599 doi: 10.1186/s13104-015-1590-1[published Online First: Epub  
21 21 Date]].
- 22 5. Lee DH, Keum N, Hu FB, et al. Comparison of the association of predicted fat mass, body mass  
23 23 index, and other obesity indicators with type 2 diabetes risk: two large prospective studies in US  
24 24 men and women. *European journal of epidemiology* 2018;33(11):1113-23 doi: 10.1007/s10654-  
25 25 018-0433-5[published Online First: Epub Date]].
- 26 6. Flegal KM, Kit BK, Orpana H, et al. Association of all-cause mortality with overweight and  
27 27 obesity using standard body mass index categories: a systematic review and meta-analysis. *Jama*  
28 28 2013;309(1):71-82 doi: 10.1001/jama.2012.113905[published Online First: Epub Date]].
- 29 7. Wang H, Zhai F. Programme and policy options for preventing obesity in China. *Obesity*  
30 30 *reviews : an official journal of the International Association for the Study of Obesity* 2013;14  
31 31 Suppl 2:134-40 doi: 10.1111/obr.12106[published Online First: Epub Date]].
- 32 8. Lao XQ, Ma WJ, Sobko T, et al. Dramatic escalation in metabolic syndrome and cardiovascular  
33 33 risk in a Chinese population experiencing rapid economic development. *BMC public health*  
34 34 2014;14:983 doi: 10.1186/1471-2458-14-983[published Online First: Epub Date]].
- 35 9. Ferretti F, Mariani M. Simple vs. Complex Carbohydrate Dietary Patterns and the Global  
36 36 Overweight and Obesity Pandemic. *International journal of environmental research and public*  
37 37 *health* 2017;14(10) doi: 10.3390/ijerph14101174[published Online First: Epub Date]].
- 38 10. Lek N, Yan W, Zhang Y, et al. Indices of central and general obesity and cardiometabolic risk  
39 39 among adolescents in three ethnic groups in north-west China. *Annals of human biology*  
40 40 2016;43(1):18-24 doi: 10.3109/03014460.2015.1014418[published Online First: Epub Date]].
- 41 11. Xie X, Ma YT, Yang YN, et al. Alcohol consumption and ankle-to-brachial index: results

- 1 from the Cardiovascular Risk Survey. PloS one 2010;5(12):e15181 doi:  
2 10.1371/journal.pone.0015181[published Online First: Epub Date]].
- 3 12. Awareness t, control of diabetes mellitus and the risk factors: survey results from northeast  
4 ChinaKilpi, F., Webber L, Musaigner A, et al. Alarming predictions for obesity and non-  
5 communicable diseases in the Middle East. Public health nutrition 2014;17(5):1078-86 doi:  
6 10.1017/S1368980013000840[published Online First: Epub Date]].
- 7 13. Wang C, Yu Y, Zhang X, et al. Awareness, treatment, control of diabetes mellitus and the risk  
8 factors: survey results from northeast China. PloS one 2014;9(7):e103594 doi:  
9 10.1371/journal.pone.0103594[published Online First: Epub Date]].
- 10 14. McManus RJ, Caulfield M, Williams B, et al. NICE hypertension guideline 2011: evidence  
11 based evolution. Bmj 2012;344:e181 doi: 10.1136/bmj.e181[published Online First: Epub Date]].
- 12 15. Davies MJ, D'Alessio DA, Fradkin J, et al. Management of Hyperglycemia in Type 2  
13 Diabetes, 2018. A Consensus Report by the American Diabetes Association (ADA) and the  
14 European Association for the Study of Diabetes (EASD). Diabetes care 2018;41(12):2669-701  
15 doi: 10.2337/dci18-0033[published Online First: Epub Date]].
- 16 16. Alshamiri M, Ghanaim MMA, Barter P, et al. Expert opinion on the applicability of  
17 dyslipidemia guidelines in Asia and the Middle East. International journal of general medicine  
18 2018;11:313-22 doi: 10.2147/IJGM.S160555[published Online First: Epub Date]].
- 19 17. Lavie CJ, Arena R, Alpert MA, et al. Management of cardiovascular diseases in patients with  
20 obesity. Nature reviews Cardiology 2018;15(1):45-56 doi: 10.1038/nrcardio.2017.108[published  
21 Online First: Epub Date]].
- 22 18. Rummo P, Kanchi R, Perlman S, et al. Correction to: Change in Obesity Prevalence among  
23 New York City Adults: the NYC Health and Nutrition Examination Survey, 2004 and 2013-2014.  
24 Journal of urban health : bulletin of the New York Academy of Medicine 2018;95(6):800 doi:  
25 10.1007/s11524-018-0310-2[published Online First: Epub Date]].
- 26 19. Collaborators GBDO, Afshin A, Forouzanfar MH, et al. Health Effects of Overweight and  
27 Obesity in 195 Countries over 25 Years. The New England journal of medicine 2017;377(1):13-27  
28 doi: 10.1056/NEJMoa1614362[published Online First: Epub Date]].
- 29 20. Vogelzangs N, Kritchevsky SB, Beekman AT, et al. Obesity and onset of significant  
30 depressive symptoms: results from a prospective community-based cohort study of older men and  
31 women. The Journal of clinical psychiatry 2010;71(4):391-9 doi:  
32 10.4088/JCP.08m04743blu[published Online First: Epub Date]].
- 33 21. Wang R, Zhang P, Gao C, et al. Prevalence of overweight and obesity and some associated  
34 factors among adult residents of northeast China: a cross-sectional study. BMJ open  
35 2016;6(7):e010828 doi: 10.1136/bmjopen-2015-010828[published Online First: Epub Date]].
- 36 22. Kontsevaya A, Shalnova S, Deev A, et al. Overweight and Obesity in the Russian Population:  
37 Prevalence in Adults and Association with Socioeconomic Parameters and Cardiovascular Risk  
38 Factors. Obesity facts 2019;12(1):103-14 doi: 10.1159/000493885[published Online First: Epub  
39 Date]].
- 40 23. Catala-Lopez F, Genova-Maleras R. [Prevention and control of chronic non-communicable  
41 diseases in Spain: A call to action]. Medicina clinica 2013;140(11):502-3 doi:  
42 10.1016/j.medcli.2012.11.006[published Online First: Epub Date]].
- 43 24. Carroll DD, Blanck HM, Serdula MK, et al. Obesity, physical activity, and depressive  
44 symptoms in a cohort of adults aged 51 to 61. Journal of aging and health 2010;22(3):384-98 doi:

- 1  
2  
3  
4  
5  
6  
7  
8  
9  
10  
11  
12  
13  
14  
15  
16  
17  
18  
19  
20  
21  
22  
23  
24  
25  
26  
27  
28  
29  
30  
31  
32  
33  
34  
35  
36  
37  
38  
39  
40  
41  
42  
43  
44  
45  
46  
47  
48  
49  
50  
51  
52  
53  
54  
55  
56  
57  
58  
59  
60
- 1 10.1177/0898264309359421[published Online First: Epub Date]].
- 2 25. Mc Hugh S, O'Neill C, Browne J, et al. Body mass index and health service utilisation in the  
3 older population: results from The Irish Longitudinal Study on Ageing. *Age and ageing*  
4 2015;44(3):428-34 doi: 10.1093/ageing/afu177[published Online First: Epub Date]].
- 5 26. Wang YT, Adi D, Yu ZX, et al. The burden and correlates of hypertension among Chinese  
6 rural population in Han, Uyгур, and Kazak: a cross-sectional study. *Journal of the American*  
7 *Society of Hypertension : JASH* 2017;11(11):737-45 e3 doi: 10.1016/j.jash.2017.09.010[published  
8 Online First: Epub Date]].
- 9 27. Dinour L, Leung MM, Tripicchio G, et al. The Association between Marital Transitions, Body  
10 Mass Index, and Weight: A Review of the Literature. *Journal of obesity* 2012;2012:294974 doi:  
11 10.1155/2012/294974[published Online First: Epub Date]].
- 12 28. Saelens BE, Glanz K, Frank LD, et al. Two-Year Changes in Child Weight Status, Diet, and  
13 Activity by Neighborhood Nutrition and Physical Activity Environment. *Obesity*  
14 2018;26(8):1338-46 doi: 10.1002/oby.22247[published Online First: Epub Date]].
- 15 29. Collaborators GBDT. Smoking prevalence and attributable disease burden in 195 countries  
16 and territories, 1990-2015: a systematic analysis from the Global Burden of Disease Study 2015.  
17 *Lancet* 2017;389(10082):1885-906 doi: 10.1016/S0140-6736(17)30819-X[published Online First:  
18 Epub Date]].
- 19 30. Marques-Vidal P, Bochud M, Mooser V, et al. Prevalence of obesity and abdominal obesity in  
20 the Lausanne population. *BMC public health* 2008;8:330 doi: 10.1186/1471-2458-8-  
21 330[published Online First: Epub Date]].
- 22 31. Siddiquee T, Bhowmik B, Da Vale Moreira NC, et al. Prevalence of obesity in a rural Asian  
23 Indian (Bangladeshi) population and its determinants. *BMC public health* 2015;15:860 doi:  
24 10.1186/s12889-015-2193-4[published Online First: Epub Date]].
- 25 32. Torigian DA, Green-McKenzie J, Liu X, et al. A Study of the Feasibility of FDG-PET/CT to  
26 Systematically Detect and Quantify Differential Metabolic Effects of Chronic Tobacco Use in  
27 Organs of the Whole Body-A Prospective Pilot Study. *Academic radiology* 2017;24(8):930-40  
28 doi: 10.1016/j.acra.2016.09.003[published Online First: Epub Date]].
- 29 33. Global BMIMC, Di Angelantonio E, Bhupathiraju Sh N, et al. Body-mass index and all-cause  
30 mortality: individual-participant-data meta-analysis of 239 prospective studies in four continents.  
31 *Lancet* 2016;388(10046):776-86 doi: 10.1016/S0140-6736(16)30175-1[published Online First:  
32 Epub Date]].
- 33 34. Lassale C, Tzoulaki I, Moons KGM, et al. Separate and combined associations of obesity and  
34 metabolic health with coronary heart disease: a pan-European case-cohort analysis. *European*  
35 *heart journal* 2018;39(5):397-406 doi: 10.1093/eurheartj/ehx448[published Online First: Epub  
36 Date]].
- 37 35. Fan J, Song Y, Chen Y, et al. Combined effect of obesity and cardio-metabolic abnormality on  
38 the risk of cardiovascular disease: a meta-analysis of prospective cohort studies. *International*  
39 *journal of cardiology* 2013;168(5):4761-8 doi: 10.1016/j.ijcard.2013.07.230[published Online  
40 First: Epub Date]].
- 41 36. Espeland MA, Glick HA, Bertoni A, et al. Impact of an intensive lifestyle intervention on use  
42 and cost of medical services among overweight and obese adults with type 2 diabetes: the action  
43 for health in diabetes. *Diabetes care* 2014;37(9):2548-56 doi: 10.2337/dc14-0093[published  
44 Online First: Epub Date]].

- 1 37. Zeng Q, Dong SY, Sun XN, et al. Percent body fat is a better predictor of cardiovascular risk  
 2 factors than body mass index. Brazilian journal of medical and biological research = Revista  
 3 brasileira de pesquisas medicas e biologicas 2012;45(7):591-600  
 4 38. Ramirez-Velez R, Correa-Bautista JE, Gonzalez-Ruiz K, et al. The Role of Body Adiposity  
 5 Index in Determining Body Fat Percentage in Colombian Adults with Overweight or Obesity.  
 6 International journal of environmental research and public health 2017;14(10) doi:  
 7 10.3390/ijerph14101093[published Online First: Epub Date]].  
 8

9 **Table 1 Prevalence of overweight and obesity according to demographic characteristics**

| Characteristic    | N    | Overweight |          |          | Obesity       |          |          |
|-------------------|------|------------|----------|----------|---------------|----------|----------|
|                   |      | n ( % )    | $\chi^2$ | <i>P</i> | n ( % )       | $\chi^2$ | <i>P</i> |
| <b>Sex</b>        |      |            |          |          |               |          |          |
| Male              | 6819 | 2735(40.1) | 71.1     | <0.001*  | 1856 ( 27.2 ) | 3.7      | 0.05     |
| Female            | 7799 | 2603(33.4) |          |          | 2013(25.8)    |          |          |
| <b>Age(years)</b> |      |            |          |          |               |          |          |
| 35-44             | 5425 | 1866(34.4) | 20.3     | <0.001*  | 1146(21.1)    | 149.8    | <0.001*  |
| 45-54             | 3759 | 1441(38.3) |          |          | 1153(30.7)    |          |          |
| 55-64             | 2932 | 1067(36.4) |          |          | 919(31.3)     |          |          |
| ≥65               | 2502 | 964(38.5)  |          |          | 651(26.0)     |          |          |
| <b>Area</b>       |      |            |          |          |               |          |          |
| Urban             | 7974 | 3163(39.7) | 75.1     | <0.001*  | 1956(24.5)    | 33.9     | <0.001*  |
| Rural             | 6644 | 2175(32.7) |          |          | 1913(28.8)    |          |          |
| <b>Ethnicity</b>  |      |            |          |          |               |          |          |
| Han               | 5757 | 2380(16.3) | 99.1     | <0.001*  | 1082(7.4)     | 331.9    | <0.001*  |
| Uyghur            | 4767 | 1635(11.2) |          |          | 1361(9.3)     |          |          |
| Kazak             | 4094 | 1323(9.1)  |          |          | 1426(9.8)     |          |          |
| <b>Occupation</b> |      |            |          |          |               |          |          |
| Manual            | 4583 | 1760(12.0) | 12.1     | 0.002*   | 1095(7.5)     | 32.1     | <0.001*  |
| White collar      | 7751 | 2736(18.7) |          |          | 2086(14.3)    |          |          |
| Other             | 2284 | 842(5.8)   |          |          | 688(4.7)      |          |          |
| <b>Education</b>  |      |            |          |          |               |          |          |

|                             |       |            |      |         |             |       |         |
|-----------------------------|-------|------------|------|---------|-------------|-------|---------|
| Primary school and below    | 5805  | 1993(13.6) | 26.9 | <0.001* | 1589(10.87) | 21.2  | <0.001* |
| Junior middle school        | 3094  | 1196(8.2)  |      |         | 844(5.8)    |       |         |
| Senior middle school        | 4556  | 1676(11.5) |      |         | 1191(8.2)   |       |         |
| Undergraduate and above     | 1163  | 473(3.2)   |      |         | 245(1.7)    |       |         |
| <b>Marriage</b>             |       |            |      |         |             |       |         |
| Unmarried                   | 192   | 59(0.4)    | 14.1 | <0.001* | 27(0.2)     | 23.1  | <0.001* |
| Married                     | 12988 | 4795(32.8) |      |         | 3427(23.4)  |       |         |
| divorced                    | 201   | 53(0.4)    |      |         | 47(0.2)     |       |         |
| widowed                     | 1237  | 431(3.0)   |      |         | 368(2.5)    |       |         |
| <b>Drinking</b>             |       |            |      |         |             |       |         |
| Yes                         | 4169  | 923(6.3)   | 44.5 | <0.001* | 663(4.5)    | 24.6  | <0.001* |
| No                          | 10449 | 4415(30.2) |      |         | 3206(21.9)  |       |         |
| <b>Smoking</b>              |       |            |      |         |             |       |         |
| Yes                         | 2151  | 1688(11.6) | 39.7 | <0.001* | 1101(7.5)   | 0.01  | 0.92    |
| No                          | 12467 | 3650(25.0) |      |         | 2768(18.9)  |       |         |
| <b>Hypertension</b>         |       |            |      |         |             |       |         |
| Yes                         | 5701  | 2138(14.6) | 3.9  | 0.05    | 2155(14.7)  | 616.8 | <0.001* |
| No                          | 8917  | 3200(21.9) |      |         | 1714(11.7)  |       |         |
| <b>Diabetes</b>             |       |            |      |         |             |       |         |
| Yes                         | 859   | 335(2.3)   | 2.4  | 0.1     | 317(2.2)    | 51.0  | <0.001* |
| No                          | 13759 | 5003(34.2) |      |         | 3552(24.3)  |       |         |
| <b>Dyslipidemia</b>         |       |            |      |         |             |       |         |
| <b>hypertriglyceridemia</b> |       |            |      |         |             |       |         |
| Yes                         | 4113  | 1724(11.8) | 72.0 | <0.001* | 1497(10.2)  | 289.9 | <0.001* |
| No                          | 10505 | 3614(24.7) |      |         | 2372(16.2)  |       |         |
| <b>hypercholesterolemia</b> |       |            |      |         |             |       |         |
| Yes                         | 3787  | 1469(10.1) | 11.4 | 0.001*  | 1267(8.7)   | 128.3 | <0.001* |

|                   |       |            |      |        |            |     |       |  |
|-------------------|-------|------------|------|--------|------------|-----|-------|--|
| No                | 10831 | 3869(26.5) |      |        | 2602(17.8) |     |       |  |
| <b>High LDL-C</b> |       |            |      |        |            |     |       |  |
| Yes               | 5251  | 1921(13.1) | 0.02 | 0.9    | 1334(9.1)  | 4.8 | 0.03* |  |
| No                | 9367  | 3417(23.4) |      |        | 2535(17.3) |     |       |  |
| <b>Low HDL-C</b>  |       |            |      |        |            |     |       |  |
| Yes               | 4437  | 1704(11.7) | 9.8  | 0.002* | 1215(8.3)  | 2.8 | 0.09  |  |
| No                | 10831 | 3634(24.9) |      |        | 2654(18.2) |     |       |  |

Categorical variables are presented as counts and percentages. HDL-c, high density lipoprotein-cholesterol; LDL-c, low density lipoprotein-cholesterol.

Data were compared by  $\chi^2$  tests. \* $P < 0.05$ , Statistically significant.

**Table 2 Prevalence of overweight and obesity in men and women according to age group**

| Age<br>(years) | Overweight |           | <i>P</i> | Obesity   |           | <i>P</i> |
|----------------|------------|-----------|----------|-----------|-----------|----------|
|                | Male(%)    | female(%) |          | male(%)   | female(%) |          |
| 35-44          | 994(40.2)  | 872(29.5) | <0.001   | 631(25.5) | 515(17.4) | <0.001   |
| 45-54          | 735(43.1)  | 706(34.4) |          | 517(30.3) | 636(31.0) |          |
| 55-64          | 476(35.8)  | 591(36.8) |          | 389(29.3) | 531(33.0) |          |
| ≥65            | 530(40.3)  | 434(36.5) |          | 319(24.3) | 332(27.9) |          |

Data were compared by  $\chi^2$  tests. \* $P < 0.05$ , Statistically significant.

**Table 3 Prevalence of overweight and obesity in Han, Uyghur and Kazak according to age group**

| Age<br>(years) | Overweight |           |           | <i>P</i> | Obesity   |           |           | <i>P</i> |
|----------------|------------|-----------|-----------|----------|-----------|-----------|-----------|----------|
|                | Han(%)     | Uyghur(%) | Kazak(%)  |          | Han(%)    | Uyghur(%) | Kazak(%)  |          |
| 35-44          | 712(35.0)  | 573(34.6) | 581(33.6) | <0.001   | 273(13.4) | 422(25.5) | 451(26.1) | <0.001   |
| 45-54          | 599(43.9)  | 481(38.1) | 361(31.9) |          | 246(18.0) | 436(34.5) | 471(41.6) |          |
| 55-64          | 497(45.9)  | 354(32.6) | 216(28.3) |          | 268(24.7) | 318(29.3) | 333(43.6) |          |
| ≥65            | 572(45.0)  | 227(29.9) | 165(35.1) |          | 295(23.2) | 185(24.3) | 171(36.4) |          |

Data were compared by  $\chi^2$  tests. \* $P < 0.05$ , Statistically significant.

**Table 4 Multivariable regression analysis of correlates of overweight and obesity in residents**

1

## of Xinjiang Province

| Characteristic           | B    | S.E. | Wald | df | P       | OR   | 95%CI   |
|--------------------------|------|------|------|----|---------|------|---------|
| <b>Area</b>              | -0.1 | 0.04 | 10.4 | 1  | 0.001*  | 0.9  | 0.8-0.9 |
| <b>Sex</b>               | -0.3 | 0.05 | 32.5 | 1  | <0.001* | 0.8  | 0.7-0.8 |
| <b>Ethnic</b>            |      |      | 94.4 | 2  | <0.001* |      |         |
| Han                      | -    | -    | -    | -  | -       | 1    | -       |
| Uygur                    | 0.4  | 0.05 | 50.0 | 1  | <0.001* | 1.4  | 1.3-1.6 |
| Kazakh                   | 0.50 | 0.05 | 86.2 | 1  | <0.001* | 1.7  | 1.5-1.8 |
| <b>Age(years)</b>        |      |      | 71.2 | 3  | <0.001* |      |         |
| 35-44                    | -    | -    | -    | -  | -       | 1    | -       |
| 45-54                    | 0.4  | 0.05 | 62.8 | 1  | <0.001* | 1.5  | 1.3-1.6 |
| 55-64                    | 0.3  | 0.05 | 24.6 | 1  | <0.001* | 1.3  | 1.2-1.5 |
| ≥65                      | 0.1  | 0.06 | 3.1  | 1  | 0.08    | 1.11 | 1.0-1.3 |
| <b>Education</b>         |      |      | 17.9 | 3  | <0.001* |      |         |
| Primary school and below | -    | -    | -    | -  | -       | 1    | -       |
| Junior middle school     | 0.2  | 0.05 | 15.6 | 1  | <0.001* | 1.2  | 1.1-1.4 |
| Senior middle school     | 0.2  | 0.06 | 7.0  | 1  | 0.008*  | 1.2  | 1.0-1.3 |
| Undergraduate and above  | 0.2  | 0.08 | 6.8  | 1  | 0.009*  | 1.3  | 1.1-1.5 |
| <b>Occupation</b>        |      |      | 10.4 | 2  | 0.006*  |      |         |
| Manual                   | -    | -    | -    | -  | -       | 1    | -       |
| White collar             | 0.01 | 0.05 | 0.04 | 1  | 0.8     | 1.0  | 0.9-1.1 |
| Other                    | 0.2  | 0.06 | 7.9  | 1  | 0.005*  | 1.2  | 1.1-1.4 |
| <b>Marriage</b>          |      |      | 26.5 | 3  | <0.001  |      |         |
| Unmarried                | -    | -    | -    | -  | -       | 1    | -       |
| Married                  | 0.6  | 0.2  | 15.5 | 1  | <0.001* | 1.8  | 1.4-2.5 |
| Divorced                 | 0.1  | 0.2  | 0.2  | 1  | 0.7     | 1.1  | 0.7-1.7 |
| widowed                  | 0.6  | 0.2  | 12.4 | 1  | <0.001* | 1.8  | 1.3-2.5 |
| <b>Smoking</b>           | -0.2 | 0.05 | 9.0  | 1  | 0.003*  | 0.9  | 0.8-0.9 |
| <b>Drinking</b>          | 0.4  | 0.06 | 34.8 | 1  | <0.001* | 1.5  | 1.3-1.6 |



|                      |      |      |       |   |         |     |         |
|----------------------|------|------|-------|---|---------|-----|---------|
| <b>Hypertension</b>  | 0.8  | 0.04 | 340.4 | 1 | <0.001* | 2.1 | 2.0-2.3 |
| <b>Diabetes</b>      | 0.3  | 0.09 | 10.4  | 1 | 0.001*  | 1.3 | 1.1-1.6 |
| <b>Dyslipidemia</b>  |      |      |       |   |         |     |         |
| hypertriglyceridemia | 0.9  | 0.05 | 371.4 | 1 | <0.001* | 2.4 | 2.2-2.7 |
| hypercholesterolemia | 0.2  | 0.05 | 20.9  | 1 | <0.001* | 1.2 | 1.1-1.3 |
| Low HDL-C            | 0.1  | 0.04 | 6.4   | 1 | 0.01*   | 1.1 | 1.0-1.2 |
| High LDL-C           | 0.02 | 0.04 | 0.16  | 1 | 0.69    | 1.0 | 0.9-1.1 |
| <b>Constant</b>      | -1.0 | 0.2  | 35.3  | 1 | <0.001  | -   | -       |

1 \* $P < 0.05$ , Statistically significant.



## STROBE Statement—checklist of items that should be included in reports of observational studies

|                              | Item No | Recommendation                                                                                                                                                                                                                                                                                                                                                                                                                                                                                                                                                                                                                                                                                                                            |
|------------------------------|---------|-------------------------------------------------------------------------------------------------------------------------------------------------------------------------------------------------------------------------------------------------------------------------------------------------------------------------------------------------------------------------------------------------------------------------------------------------------------------------------------------------------------------------------------------------------------------------------------------------------------------------------------------------------------------------------------------------------------------------------------------|
| <b>Title and abstract</b>    | 1       | (a) Indicate the study's design with a commonly used term in the title or the abstract ( <a href="#">On page 1, line 1</a> )<br>(b) Provide in the abstract an informative and balanced summary of what was done and what was found ( <a href="#">On page 2</a> )                                                                                                                                                                                                                                                                                                                                                                                                                                                                         |
| <b>Introduction</b>          |         |                                                                                                                                                                                                                                                                                                                                                                                                                                                                                                                                                                                                                                                                                                                                           |
| Background/rationale         | 2       | Explain the scientific background and rationale for the investigation being reported ( <a href="#">On page 2, line 2-5</a> )                                                                                                                                                                                                                                                                                                                                                                                                                                                                                                                                                                                                              |
| Objectives                   | 3       | State specific objectives, including any prespecified hypotheses ( <a href="#">On page 2, line 2-5</a> )                                                                                                                                                                                                                                                                                                                                                                                                                                                                                                                                                                                                                                  |
| <b>Methods</b>               |         |                                                                                                                                                                                                                                                                                                                                                                                                                                                                                                                                                                                                                                                                                                                                           |
| Study design                 | 4       | Present key elements of study design early in the paper ( <a href="#">On page 4, line 9</a> )                                                                                                                                                                                                                                                                                                                                                                                                                                                                                                                                                                                                                                             |
| Setting                      | 5       | Describe the setting, locations, and relevant dates, including periods of recruitment, exposure, follow-up, and data collection ( <a href="#">On page 2, line 7</a> )                                                                                                                                                                                                                                                                                                                                                                                                                                                                                                                                                                     |
| Participants                 | 6       | (a) <i>Cohort study</i> —Give the eligibility criteria, and the sources and methods of selection of participants. Describe methods of follow-up<br><i>Case-control study</i> —Give the eligibility criteria, and the sources and methods of case ascertainment and control selection. Give the rationale for the choice of cases and controls<br><i>Cross-sectional study</i> —Give the eligibility criteria, and the sources and methods of selection of participants ( <a href="#">On page 4, line 9-20</a> )<br>(b) <i>Cohort study</i> —For matched studies, give matching criteria and number of exposed and unexposed<br><i>Case-control study</i> —For matched studies, give matching criteria and the number of controls per case |
| Variables                    | 7       | Clearly define all outcomes, exposures, predictors, potential confounders, and effect modifiers. Give diagnostic criteria, if applicable ( <a href="#">On page 5,6</a> )                                                                                                                                                                                                                                                                                                                                                                                                                                                                                                                                                                  |
| Data sources/<br>measurement | 8*      | For each variable of interest, give sources of data and details of methods of assessment (measurement). Describe comparability of assessment methods if there is more than one group ( <a href="#">On page 4,5</a> )                                                                                                                                                                                                                                                                                                                                                                                                                                                                                                                      |
| Bias                         | 9       | Describe any efforts to address potential sources of bias ( <a href="#">On page 11, line 1-3</a> )                                                                                                                                                                                                                                                                                                                                                                                                                                                                                                                                                                                                                                        |
| Study size                   | 10      | Explain how the study size was arrived at ( <a href="#">On page 4, line 15-16</a> )                                                                                                                                                                                                                                                                                                                                                                                                                                                                                                                                                                                                                                                       |
| Quantitative variables       | 11      | Explain how quantitative variables were handled in the analyses. If applicable, describe which groupings were chosen and why ( <a href="#">On page 4,5</a> )                                                                                                                                                                                                                                                                                                                                                                                                                                                                                                                                                                              |
| Statistical methods          | 12      | (a) Describe all statistical methods, including those used to control for confounding ( <a href="#">On page 6</a> )<br>(b) Describe any methods used to examine subgroups and interactions<br>(c) Explain how missing data were addressed<br>(d) <i>Cohort study</i> —If applicable, explain how loss to follow-up was addressed<br><i>Case-control study</i> —If applicable, explain how matching of cases and controls was addressed<br><i>Cross-sectional study</i> —If applicable, describe analytical methods taking account of sampling strategy ( <a href="#">On page 6</a> )<br>(e) Describe any sensitivity analyses                                                                                                             |

1  
2  
3  
4  
5  
6  
7  
8  
9  
10  
11  
12  
13  
14  
15  
16  
17  
18  
19  
20  
21  
22  
23  
24  
25  
26  
27  
28  
29  
30  
31  
32  
33  
34  
35  
36  
37  
38  
39  
40  
41  
42  
43  
44  
45  
46  
47  
48  
49  
50  
51  
52  
53  
54  
55  
56  
57  
58  
59  
60

Continued on next page

For peer review only

1  
2  
3  
4  
5  
6  
7  
8  
9  
10  
11  
12  
13  
14  
15  
16  
17  
18  
19  
20  
21  
22  
23  
24  
25  
26  
27  
28  
29  
30  
31  
32  
33  
34  
35  
36  
37  
38  
39  
40  
41  
42  
43  
44  
45  
46  
47  
48  
49  
50  
51  
52  
53  
54  
55  
56  
57  
58  
59  
60

| <b>Results</b>           |     |                                                                                                                                                                                                                                                                                                                                                                                                                                                                               |
|--------------------------|-----|-------------------------------------------------------------------------------------------------------------------------------------------------------------------------------------------------------------------------------------------------------------------------------------------------------------------------------------------------------------------------------------------------------------------------------------------------------------------------------|
| Participants             | 13* | (a) Report numbers of individuals at each stage of study—eg numbers potentially eligible, examined for eligibility, confirmed eligible, included in the study, completing follow-up, and analysed ( <a href="#">On page 4, line 15-16</a> )<br>(b) Give reasons for non-participation at each stage<br>(c) Consider use of a flow diagram                                                                                                                                     |
| Descriptive data         | 14* | (a) Give characteristics of study participants (eg demographic, clinical, social) and information on exposures and potential confounders ( <a href="#">On page 14, Table1</a> )<br>(b) Indicate number of participants with missing data for each variable of interest<br>(c) <i>Cohort study</i> —Summarise follow-up time (eg, average and total amount)                                                                                                                    |
| Outcome data             | 15* | <i>Cohort study</i> —Report numbers of outcome events or summary measures over time<br><i>Case-control study</i> —Report numbers in each exposure category, or summary measures of exposure<br><i>Cross-sectional study</i> —Report numbers of outcome events or summary measures ( <a href="#">On page 6-7</a> )                                                                                                                                                             |
| Main results             | 16  | (a) Give unadjusted estimates and, if applicable, confounder-adjusted estimates and their precision (eg, 95% confidence interval). Make clear which confounders were adjusted for and why they were included ( <a href="#">On page 6,7</a> )<br>(b) Report category boundaries when continuous variables were categorized<br>(c) If relevant, consider translating estimates of relative risk into absolute risk for a meaningful time period ( <a href="#">On page 6,7</a> ) |
| Other analyses           | 17  | Report other analyses done—eg analyses of subgroups and interactions, and sensitivity analyses ( <a href="#">On page 6,7</a> )                                                                                                                                                                                                                                                                                                                                                |
| <b>Discussion</b>        |     |                                                                                                                                                                                                                                                                                                                                                                                                                                                                               |
| Key results              | 18  | Summarise key results with reference to study objectives ( <a href="#">On page 8</a> )                                                                                                                                                                                                                                                                                                                                                                                        |
| Limitations              | 19  | Discuss limitations of the study, taking into account sources of potential bias or imprecision. Discuss both direction and magnitude of any potential bias ( <a href="#">On page 10,11</a> )                                                                                                                                                                                                                                                                                  |
| Interpretation           | 20  | Give a cautious overall interpretation of results considering objectives, limitations, multiplicity of analyses, results from similar studies, and other relevant evidence ( <a href="#">On page 11</a> )                                                                                                                                                                                                                                                                     |
| Generalisability         | 21  | Discuss the generalisability (external validity) of the study results ( <a href="#">On page 11</a> )                                                                                                                                                                                                                                                                                                                                                                          |
| <b>Other information</b> |     |                                                                                                                                                                                                                                                                                                                                                                                                                                                                               |
| Funding                  | 22  | Give the source of funding and the role of the funders for the present study and, if applicable, for the original study on which the present article is based ( <a href="#">On page 11</a> )                                                                                                                                                                                                                                                                                  |

\*Give information separately for cases and controls in case-control studies and, if applicable, for exposed and unexposed groups in cohort and cross-sectional studies.

**Note:** An Explanation and Elaboration article discusses each checklist item and gives methodological background and published examples of transparent reporting. The STROBE checklist is best used in conjunction with this article (freely available on the Web sites of PLoS Medicine at <http://www.plosmedicine.org/>, Annals of Internal Medicine at <http://www.annals.org/>, and Epidemiology at <http://www.epidem.com/>). Information on the STROBE Initiative is available at [www.strobe-statement.org](http://www.strobe-statement.org).

# BMJ Open

## Prevalence of overweight and obesity and associated risk factors among adult residents of northwest China: A cross-sectional study

|                               |                                                                                                                                                                                                                                                                                                                                                                                                                                                                                                                                                                                                                                                                                                                                                                                                                                                                                                                                                                                                                                                                                                                                                                                                                                                                                                                                                                                                                                                                                                                                                                                                                                                                                                                                                                                                                                                                                                                                                                                                                                                                                                                                                                                                                                                                                                                                                                                                                                                                                                            |
|-------------------------------|------------------------------------------------------------------------------------------------------------------------------------------------------------------------------------------------------------------------------------------------------------------------------------------------------------------------------------------------------------------------------------------------------------------------------------------------------------------------------------------------------------------------------------------------------------------------------------------------------------------------------------------------------------------------------------------------------------------------------------------------------------------------------------------------------------------------------------------------------------------------------------------------------------------------------------------------------------------------------------------------------------------------------------------------------------------------------------------------------------------------------------------------------------------------------------------------------------------------------------------------------------------------------------------------------------------------------------------------------------------------------------------------------------------------------------------------------------------------------------------------------------------------------------------------------------------------------------------------------------------------------------------------------------------------------------------------------------------------------------------------------------------------------------------------------------------------------------------------------------------------------------------------------------------------------------------------------------------------------------------------------------------------------------------------------------------------------------------------------------------------------------------------------------------------------------------------------------------------------------------------------------------------------------------------------------------------------------------------------------------------------------------------------------------------------------------------------------------------------------------------------------|
| Journal:                      | <i>BMJ Open</i>                                                                                                                                                                                                                                                                                                                                                                                                                                                                                                                                                                                                                                                                                                                                                                                                                                                                                                                                                                                                                                                                                                                                                                                                                                                                                                                                                                                                                                                                                                                                                                                                                                                                                                                                                                                                                                                                                                                                                                                                                                                                                                                                                                                                                                                                                                                                                                                                                                                                                            |
| Manuscript ID                 | bmjopen-2018-028131.R2                                                                                                                                                                                                                                                                                                                                                                                                                                                                                                                                                                                                                                                                                                                                                                                                                                                                                                                                                                                                                                                                                                                                                                                                                                                                                                                                                                                                                                                                                                                                                                                                                                                                                                                                                                                                                                                                                                                                                                                                                                                                                                                                                                                                                                                                                                                                                                                                                                                                                     |
| Article Type:                 | Research                                                                                                                                                                                                                                                                                                                                                                                                                                                                                                                                                                                                                                                                                                                                                                                                                                                                                                                                                                                                                                                                                                                                                                                                                                                                                                                                                                                                                                                                                                                                                                                                                                                                                                                                                                                                                                                                                                                                                                                                                                                                                                                                                                                                                                                                                                                                                                                                                                                                                                   |
| Date Submitted by the Author: | 15-Jul-2019                                                                                                                                                                                                                                                                                                                                                                                                                                                                                                                                                                                                                                                                                                                                                                                                                                                                                                                                                                                                                                                                                                                                                                                                                                                                                                                                                                                                                                                                                                                                                                                                                                                                                                                                                                                                                                                                                                                                                                                                                                                                                                                                                                                                                                                                                                                                                                                                                                                                                                |
| Complete List of Authors:     | <p>Song, Ning; Xinjiang Medical University Affiliated First Hospital, Department of Cardiology; Xinjiang Key Laboratory of Cardiovascular Disease Research, Clinical Medicine Institute, The First Affiliated Hospital of Xinjiang Medical University</p> <p>Fen, Liu; Xinjiang Medical University Affiliated First Hospital, Department of Cardiology; Xinjiang Key Laboratory of Cardiovascular Disease Research, Clinical Medicine Institute, The First Affiliated Hospital of Xinjiang Medical University</p> <p>Han, Min; Xinjiang Medical University Affiliated First Hospital, Department of Cardiology; Xinjiang Key Laboratory of Cardiovascular Disease Research, Clinical Medicine Institute, The First Affiliated Hospital of Xinjiang Medical University</p> <p>Zhao, Qiang; Xinjiang Medical University Affiliated First Hospital, Department of Cardiology; Xinjiang Key Laboratory of Cardiovascular Disease Research, Clinical Medicine Institute, The First Affiliated Hospital of Xinjiang Medical University</p> <p>Zhao, Qian; Xinjiang Medical University Affiliated First Hospital, Department of Cardiology; Xinjiang Key Laboratory of Cardiovascular Disease Research</p> <p>Zhai, Hui; Xinjiang Medical University Affiliated First Hospital, Department of Cardiology; Xinjiang Key Laboratory of Cardiovascular Disease Research, Clinical Medicine Institute, The First Affiliated Hospital of Xinjiang Medical University</p> <p>Li, Xiangmei; Xinjiang Medical University Affiliated First Hospital, Department of Cardiology; Xinjiang Key Laboratory of Cardiovascular Disease Research, Clinical Medicine Institute, The First Affiliated Hospital of Xinjiang Medical University</p> <p>Du, Guoli; Xinjiang Medical University Affiliated First Hospital, Department of Cardiology; Xinjiang Key Laboratory of Cardiovascular Disease Research, Clinical Medicine Institute, The First Affiliated Hospital of Xinjiang Medical University</p> <p>Li, Xiao-Mei; Xinjiang Medical University Affiliated First Hospital, Department of Cardiology; Xinjiang Key Laboratory of Cardiovascular Disease Research, Clinical Medicine Institute, The First Affiliated Hospital of Xinjiang Medical University</p> <p>Yang, Yi-Ning; Xinjiang Medical University Affiliated First Hospital, Department of Cardiology; Xinjiang Key Laboratory of Cardiovascular Disease Research, Clinical Medicine Institute, The First Affiliated Hospital of Xinjiang Medical University</p> |

1  
2  
3  
4  
5  
6  
7  
8  
9  
10  
11  
12  
13  
14  
15  
16  
17  
18  
19  
20  
21  
22  
23  
24  
25  
26  
27  
28  
29  
30  
31  
32  
33  
34  
35  
36  
37  
38  
39  
40  
41  
42  
43  
44  
45  
46  
47  
48  
49  
50  
51  
52  
53  
54  
55  
56  
57  
58  
59  
60

|                                   |                                                              |
|-----------------------------------|--------------------------------------------------------------|
| <b>Primary Subject Heading:</b>   | Public health                                                |
| <b>Secondary Subject Heading:</b> | Cardiovascular medicine, Epidemiology, Ethics, Global health |
| <b>Keywords:</b>                  | cross-sectional survey, overweight, obesity, risk factors    |
|                                   |                                                              |

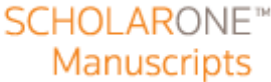

1  
2  
3  
4 1 **Prevalence of overweight and obesity and associated risk factors among adult residents of**  
5  
6 2 **northwest China: A cross- sectional study**

7  
8 3 Ning Song<sup>1,2+</sup>, Fen Liu<sup>1,2+</sup>, Min Han<sup>1,2</sup>, Qiang Zhao<sup>1,2</sup>, Qian Zhao<sup>1,2</sup>, Hui Zhai<sup>1,2</sup>, Xiangmei Li<sup>1,2</sup>,  
9  
10 4 Guoli Du<sup>1,2</sup>, Xiaomei Li<sup>1,2,\*</sup>, and Yining Yang<sup>1,2,\*</sup>

11  
12  
13 5 1 Department of Cardiology, The First Affiliated Hospital of Xinjiang Medical University, Urumqi,  
14  
15 6 China;

16  
17  
18 7 2 Xinjiang Key Laboratory of Cardiovascular Disease Research, Clinical Medicine Institute, The  
19  
20 8 First Affiliated Hospital of Xinjiang Medical University, Urumqi, China.

21  
22  
23 9 + These authors have contributed equally to this work.

24  
25  
26 10 **\*Corresponding Author**

27  
28  
29 11 Full name: Xiaomei Li

30  
31  
32 12 Institute: Xinjiang Key Laboratory of Cardiovascular Disease Research, Urumqi, China.

33  
34 13 Department: Department of Cardiology, The First Affiliated Hospital of Xinjiang Medical  
35  
36 14 University.

37  
38  
39 15 Street Name & Number: 137 Liyushan South Road, Urumqi, 830054, China.

40  
41  
42 16 Telephone: 18690897592 Fax number: 0991-4362611 e-mail: [lixm505@163.com](mailto:lixm505@163.com).

43  
44  
45 17 Full name: Yining Yang

46  
47  
48 18 Institute: Xinjiang Key Laboratory of Cardiovascular Disease Research, Urumqi, China.

49  
50 19 Department: Department of Cardiology, The First Affiliated Hospital of Xinjiang Medical  
51  
52 20 University.

53  
54  
55 21 Street Name & Number: 137 Liyushan South Road, Urumqi, 830054, China.

56  
57  
58 22 Tel: 86-991-4361690 Fax: 86-991-4365330 E-mail: [yangyn5126@163.com](mailto:yangyn5126@163.com).

1  
2  
3  
4 1  
5  
67 2 **Abstract**

8 3 **Objective:** Overweight and obesity have been shown to be related to multiple chronic conditions  
9 4 and lead to a heavy economic burden on society throughout the world. This study aims to estimate  
10 5 the prevalence of overweight and obesity and determine potential influencing factors among adults  
11 6 in Xinjiang, northwest China.

12 7 **Design:** A community-based observational study.

13 8 **Setting:** The First Affiliated Hospital of Xinjiang Medical University.

14 9 **Methods:** In total, 14,618 adult participants (7,799 males; 6,819 females), aged over 35 years old,  
15 10 were recruited from the Cardiovascular Risk Survey conducted in 2010. Data were obtained from  
16 11 face-to-face interview and physical examination. The sample was used to estimate the prevalence  
17 12 of overweight (body mass index (BMI) [24-28] kg/m<sup>2</sup>) and obesity (BMI≥28 kg/m<sup>2</sup>) in Xinjiang  
18 13 Province, and the influencing factors were analyzed based on statistical methods.

19 14 **Results:** The overall prevalence of overweight was 36.5% (male 40.1%; female 33.4%), and the  
20 15 prevalence of obesity was 26.5% (male 27.2%; female 25.8%) in Xinjiang Province. The  
21 16 prevalence of both overweight and obesity were higher in women than men ( $P<0.001$ ). The main  
22 17 influencing factors for overweight and obesity are sex, age, race, marriage status, education level,  
23 18 occupation, smoking, drinking, hypertension, diabetes and dyslipidemia ( $P<0.05$ ).

24 19 **Conclusions:** This study estimated that the prevalence of overweight and obesity among adult  
25 20 residents of Xinjiang Province, northwest China, was high. These data suggest that efforts toward  
26 21 prevention and control of overweight and obesity should be a public health priority in the  
27 22 northwest of China.

28 23 **Keywords:** cross-sectional survey, overweight, obesity, risk factors

29 24 **Strengths and limitations of this study**

- 30 25 ➤ The survey sample was demographically representative of Uygur adults with obesity aged  
31 26 35–80 years in Xinjiang.
- 32 27 ➤ The main strengths of our study are its large sample size and precise physical measurements,  
33 28 which increase the validity of our results.
- 34 29 ➤ Due to the cross-sectional nature and self-designed questionnaire, indicators and experience

1 could have been affected by bias.

2 ➤ Moreover, other indicators of adiposity, such as body fat percentage and waist circumference  
3 were not obtained in our study.

4 ➤ The results were from Xinjiang only and therefore cannot be generalised to the whole China.

## 6 **Introduction**

7 Obesity is a complex chronic global disease affecting people worldwide across all ages, sexes,  
8 ethnicities, and nationalities, which is the fifth leading cause of mortality globally <sup>1,2</sup>. According to  
9 the World Health Organization (WHO), the prevalence of worldwide obesity has doubled in more  
10 than 70 countries since 1980 <sup>3</sup>; this trend has continuously increased in most other countries. In 2013,  
11 in order to make physicians pay more attention to the condition, the American Medical Association  
12 classified obesity as a disease <sup>4</sup>.

13 Body mass index (BMI), which is calculated as weight/height squared ( $\text{kg}/\text{m}^2$ ), is a common  
14 and accepted measure that is used to report obesity rates. While BMI is not a true measure of  
15 adiposity, it is simple to use in health screenings and epidemiological surveys <sup>5</sup>. According to the  
16 WHO, obesity is defined as a  $\text{BMI} \geq 30 \text{ kg}/\text{m}^2$ , and overweight as a BMI of  $[25-30) \text{ kg}/\text{m}^2$  <sup>6</sup>. For  
17 Chinese people, a  $\text{BMI} \geq 28 \text{ kg}/\text{m}^2$  suggests obesity and a BMI of  $[24-28) \text{ kg}/\text{m}^2$  indicates overweight  
18 <sup>7</sup>.

19 China is the largest developing country and has the largest population in the world. With the  
20 rapid economic growth and changes in lifestyle such as dietary habits and physical activity <sup>8</sup>, the  
21 epidemiological data indicated that individuals with overweight and obesity had a higher prevalence  
22 of traditional diseases including dyslipidemia, hypertension, cardiovascular disease, insulin  
23 resistance or diabetes, fatty liver disease, and psychosocial complications and some cancers <sup>5,9</sup>.  
24 Located in the northwest China, Xinjiang not only is an autonomous minority ethnic region of the  
25 People's Republic of China, but also is one of the developing regions in China. It is the largest  
26 Chinese administrative division and spans over 1.66 million  $\text{km}^2$  which takes up about one sixth of  
27 the country's territory. A few of studies had reported the prevalence of overweight among adults in  
28 Xinjiang <sup>10</sup>. Nevertheless, the samples in above mentioned studies were small, those results cannot  
29 represent accurately the status of overweight and obesity in the whole region of Xinjiang.



1  
2  
3  
4 1 In the present study, we estimated the prevalence of overweight and obesity in Xinjiang.  
5  
6 2 Meanwhile, the potential influencing factors in adult residents of northwest China were explored.  
7  
8 3 The results of this study will be considered as a reference for policy makers in making informed  
9  
10 4 decisions.

## 11 **Materials and Methods**

### 12 **Ethics approval**

13  
14  
15 7 This study was conducted according to the standards of the Declaration of Helsinki. Written  
16  
17 8 informed consent was acquired from each participant prior to enrollment. Ethics approval was from  
18  
19 9 the Ethics Committee of the First Affiliated Hospital of Xinjiang Medical University (the approval  
20  
21 10 ID: 20100116-01).

### 11 **Study design and population**

12  
13 12 This population-based cross-sectional survey is part of the Project on Present Situation and the  
14  
15 13 Cardiovascular Risk Survey (CRS) study in Xinjiang Province of China in 2010. The CRS was a  
16  
17 14 prospective, multiple ethnicity and community-based observational study designed to investigate  
18  
19 15 the prevalence and risk factors for cardiovascular disease (CVD) in the Han, Uyghur and Kazakh  
20  
21 16 populations in Xinjiang Province<sup>11</sup>. All the subjects included had lived in Xinjiang Province for  
22  
23 17 more than 1 year. Briefly, the CRS consisted of 16,460 adults aged  $\geq 35$  years old, of whom 14,618  
24  
25 18 subjects (5,757 Han, 4,767 Uyghur and 4,094 Kazakh Chinese) completed the survey, yielding a  
26  
27 19 response rate of 88.8%. We used a multistage stratified sampling method to select the study sample  
28  
29 20 from 6 different administrative regions including Urumqi, Yili, Hetian, Kalamayi, Fukang, and  
30  
31 21 Turpan. Finally, each participant was selected randomly from each household in the sites mentioned  
32  
33 22 above.

### 23 **Data collection**

24  
25 24 The formal survey was made up of two parts: face-to-face interview and physical examination.  
26  
27 25 Before the formal survey, we conducted a pre-survey to explore the feasibility of the questionnaire.  
28  
29 26 During the investigation, each completed questionnaire was examined by two investigators to ensure  
30  
31 27 validity and consistency. After the fieldwork, data were manipulated by parallel double entry, and  
32  
33 28 we also performed three verifications to check for incomplete and inconsistent responses. The  
34  
35 29 questionnaire provided demographics, general personal information and medical histories<sup>12</sup>. Height  
36  
37  
38  
39  
40  
41  
42  
43  
44  
45  
46  
47  
48  
49  
50  
51  
52  
53  
54  
55  
56  
57  
58  
59  
60

1 and weight were measured using a standard protocol. Height was measured to the nearest 0.1 cm,  
2 and weight was measured with a standard scale in the upright position to the nearest 0.1 kg. Smoking  
3 and drinking conditions were self-reported.

4 Blood samples collection was conducted in examination centers at local hospital in the  
5 participants' residential area. At the time of the in-person interview, a 5mL of venous blood was  
6 collected into EDTA tubes and processed to obtain plasma within 4h. All samples were stored at  
7 -80°C immediately after processing. We measured the concentration of fasting glucose using  
8 equipment for chemical analysis (Dimension AR/AVL Clinical Chemistry System, Newark, NJ,  
9 USA) employed by the Clinical Laboratory Department of the First Affiliated Hospital of Xinjiang  
10 Medical University. Biochemical markers in plasma including total cholesterol (TC), triglycerides  
11 (TG), high-density lipoprotein cholesterol (HDL-C) and low-density lipoprotein cholesterol (LDL-  
12 C) were measured.

### 13 **Definition of variables**

14 Overweight and obesity were defined by Chinese standards mentioned above. Obesity was  
15 defined as  $BMI \geq 28 \text{ kg/m}^2$ , and overweight was defined as a BMI of [24-28)  $\text{kg/m}^2$ .

16 Education was classified into four levels: Primary school and below (including never attended  
17 school and elementary schooling only); Junior middle school; Senior middle school (including  
18 secondary vocational schooling); undergraduate and above (including post-secondary vocational  
19 schooling, master's degree and doctoral degree). Manual labor included farmers, production and  
20 service workers. White collar occupations included office and other technical employment. Other  
21 occupations included unemployed, retiree, student and full-time housewife<sup>13</sup>. Smoking status  
22 classifications were current smokers (which had smoked at least one cigarette a day over the past  
23 30 days), and never-smokers. Drinking status classifications were current drinkers (which had  
24 consumed more than one alcoholic drink a week), and never-drinkers. Hypertension was defined as  
25 mean systolic BP  $\geq 140 \text{ mmHg}$ , and/or mean diastolic BP  $\geq 90 \text{ mmHg}$ , and/or current use of  
26 antihypertensive medications<sup>14</sup>. Diabetes was defined as fasting plasma glucose  $\geq 126 \text{ mg/dL}$   
27 ( $\geq 7.0 \text{ mmol/L}$ ) and/or self-reported history of diabetes and/or current use of insulin or antidiabetic  
28 medications<sup>15</sup>. Hypercholesterolemia was defined as serum total cholesterol level  $> 6.22 \text{ mmol/L}$   
29 ( $240 \text{ mg/dL}$ ), and hypertriglyceridemia was defined as serum triglyceride level  $> 2.26 \text{ mmol/L}$  ( $200$

1 mg/dL). A serum LDL-C level of  $>4.14$  mmol/L (160 mg/dL) was defined as high LDL-C, and a  
2 serum HDL-C level of  $<1.04$  mmol/L (40 mg/dL) was defined as low HDL-C. In total, dyslipidemia  
3 was defined as the existence of at least one of the four abnormal lipid concentrations mentioned  
4 above, or self-reported use of lipid-lowering drugs <sup>16</sup>.

## 5 **Statistical analysis**

6 Data was verified and corrected using EpiData 3.02 software (EpiData, Association, Odense,  
7 Denmark) by 2 staff members. Frequency distribution was used to present characteristics of the  
8 subjects, and data presented as percentages were used to report the prevalence ratio. Continuous  
9 variables were expressed as mean $\pm$ standard deviation (SD) and or numerical data were expressed  
10 as rates, and a Chi-square test ( $\chi^2$ ) was used to compare the prevalence of overweight and obesity  
11 in different groups.

12 To analyze the factors for obesity and adjust for potential confounding effects, a multivariable  
13 logistic regression analyses were carried out to explore independent factors associated with  
14 overweight and obesity. OR with 95% CI was used for the risk analysis. All statistical analyses were  
15 conducted using the complex sampling function of Social Sciences SPSS for Windows version 22.0  
16 (SPSS, Inc, Chicago, IL, USA), and a  $P<0.05$  level of significance was selected.

## 17 **Patient and public involvement**

18 This population-based cross-sectional survey is part of the Project on Present Situation and  
19 the Cardiovascular Risk Survey (CRS) study in Xinjiang Province of China in 2010. The study  
20 was designed to investigate the prevalence of overweight and obesity among adult residents in  
21 Xinjiang, the northwest China. However, no patients or members of the public were included in  
22 the design, recruitment or conduct of the study. The results of measurements would be  
23 disseminated to participants after the study which was completed by the study team. The burden of  
24 the intervention will not be assessed by patients themselves.

## 25 **Results**

26 In this survey, we interviewed 14618 residents aged 35 to 101 years (mean age:  $50.8\pm 12.6$   
27 years), comprised of 6,819 (46.6%) men and 7,799 (53.4%) women. Among these participants,  
28 5,757 (39.4%) were Han ethnicities with a mean age of  $52.5\pm 12.7$  years, 4,767 (32.6%) were Uyghur  
29 ethnicities with a mean age of  $50.7\pm 13.0$  years, and 4,094 (28.0%) were Kazakh ethnicities with a

1 mean age of 48.6±11.7 years. According to the BMI classification for Chinese people, the overall  
2 prevalence of overweight was 36.5% (male 40.1%; female 33.4%), and the prevalence of obesity  
3 was 26.5% (male 27.2%; female 25.8%) in Xinjiang Province (**Table 1**). There were differences in  
4 age, area, race, occupation, education, marriage, drinking, hypertension history and plasma levels  
5 of TG, TC among the overweight and obesity groups, while there was no significant difference in  
6 sex, smoking, diabetes history and the level of LDL-c and HDL-C among the 2 groups.

7 From the age-stratified and gender-stratified results in **Table 2**, for men, the prevalence of both  
8 overweight and obesity all peaked at 45-54 years, while no significant trend was illustrated in the  
9 prevalence of overweight increased with age. For women, the prevalence of overweight and obesity  
10 increased with age, peaking at 55-64 years, though there has a slight decrease at ≥65 years. In  
11 addition, a higher proportion of enrolled males were overweight than females. Interestingly, the  
12 proportions of females who were obese were higher than those of males.

13 From the age-stratified and race-stratified results in **Table 3**, as a whole, obesity prevalence in  
14 the different ethnicities was found to be the highest in Kazakh and the lowest in Han participants,  
15 and there was a statistical significance among the three ethnic groups ( $P<0.001$ ). Further,  
16 overweight prevalence also showed an interesting significant difference among the three ethnicities,  
17 the highest in Han and the lowest in Kazakh participants.

18 We divided the participants into two groups: normal weight; overweight and obese. **Table 1**  
19 has shown that the following factors all had a significant effect: age, area, race, education, marriage  
20 status, occupation, drinking, hypertension and dyslipidemia ( $P<0.05$ ). We applied multivariable  
21 unconditional logistic regression analysis model on all identified risk factors and attempted to  
22 identify any existing difference in these risk factors which may explain the difference in overweight  
23 and obesity prevalence. **Table 4** shows the results of logistic regression models comparing the  
24 prevalence of the potential risk factors: sex, age, area, marriage status, occupation, smoking,  
25 drinking, hypertension, diabetes and the level of dyslipidemia, including hypercholesterolemia,  
26 hypertriglyceridemia and low HDL-C. The multivariable logistic regression results reveal that  
27 female adults prefer to become overweight and obese than male adults (OR 0.8, 95% CI 0.7 to 0.8).  
28 We categorized age into four groups, which clearly showed that increasing age is a risk factor for  
29 overweight/obesity, especially age 45-54 years (OR 1.5, 95% CI 1.3 to 1.6). Among the three races,

1 Kazak population (OR 1.7, 95% CI 1.5 to 1.8) and Uygur population (OR 1.4, 95% CI 1.3 to 1.6)  
2 carried higher risk to become overweight and obese. Participants who have married (OR 1.8, 95%  
3 CI 1.4 to 2.5) or widowed (OR 1.8, 95% CI 1.3 to 2.5) are easier to be overweight/obese than those  
4 who have unmarried. In addition, smokers (OR 0.9, 95% CI 0.8 to 0.9) are less likely to become  
5 overweight and obese than nonsmokers. Participants who drink are more likely to become  
6 overweight or obese than those who never or rarely drink (OR 1.5, 95% CI 1.3 to 1.6). Overweight  
7 and obesity are more common among those who had hypertension (OR 2.1, 95% CI 2.0 to 2.3) and  
8 diabetes (OR 1.3, 95% CI 1.1 to 1.6) compared with those who had no hypertension and diabetes  
9 history. In the overweight and obese population, hypertriglyceridemia (OR 2.4, 95% CI 2.2 to 2.7),  
10 hypercholesterolemia (OR 1.2, 95% CI 1.1 to 1.3) and low HDL-C (OR 1.1, 95% CI 1.0 to 1.2)  
11 remained as risk factors.

## 12 Discussion

13 The epidemic of obesity is one of the most important health problems worldwide and is  
14 estimated to be the second leading cause of preventable death in developed countries, behind  
15 cigarette smoking<sup>17 18</sup>. The prevalence of overweight and obesity continues to increase around the  
16 world, as have associated comorbidities and healthcare costs<sup>19</sup>. In the US, the prevalence of obesity  
17 accounts for one-third of the general population, and another one-third is overweight<sup>20</sup>. Data from  
18 the China Chronic Disease Survey conducted by the Chinese Center for Disease Control and  
19 Prevention demonstrated that the prevalence of overweight among Chinese adults (age 18–64 years)  
20 for 2007 and 2010 was 26.6% and 30.6%, respectively (male 27.4% and 32.1%; female 25.7% and  
21 29.1%), and the prevalence of obesity was 7.7% and 12.1%, respectively (male 6.7% and 12.5%;  
22 female 8.7% and 11.1%)<sup>21</sup>. No doubt, we found that the prevalence of both overweight and obesity  
23 was high. Our cross-sectional study indicates that the prevalence of overweight and obesity among  
24 adults in northwest China was 36.5% (male 40.1%; female 33.4%), and 26.5% (male 27.2%; female  
25 25.8%). In the Russian population<sup>22</sup>, the overweight was 64.6% (male 42.3%; female 28.7%), and  
26 approximately a third of the participants (30.3%) had obesity (male 27.5%; female 31.4%). Contrary  
27 to what was observed in our research, the prevalence of overweight was higher than obesity. This  
28 implies that overweight and obesity have a higher prevalence in both sexes and are more common  
29 in northwest China and Russian than in other areas, although effective actions might have been

1 taken to control the upward trend <sup>23</sup>. The prevalence of underweight (according to the Chinese  
2 standards: underweight<18.5 kg/m<sup>2</sup>) was significant difference among each group ( $P<0.05$ )  
3 **(Supplementary Table 1)**, however, due to the special dietary habits (high sugar and high fat diet)  
4 and living habits in Xinjiang, the number of low-weight people is too small.

5 In this study, we found that the prevalence of both overweight and obesity is high in middle  
6 age (45-64 years). Similarly, age gradients in the prevalence of obesity are found in Russia <sup>22</sup>. It is  
7 worth noting that more than half of all women aged 55–64 years have obesity, and nearly 80% men  
8 in the groups aged 45–54 years had overweight and obesity, which consists with our age gradients.  
9 Chinese people are more likely to have positive perceptions of obesity because it is considered good  
10 fortune to become fat during middle age in traditional Chinese culture <sup>24</sup>. Moreover, a large segment  
11 of the middle-aged and older adult population will be living with overweight and obesity, which is  
12 associated with additional health impairments <sup>25</sup>.

13 Through the present study, we found a very high prevalence of overweight and obesity in three  
14 ethnicities in Xinjiang, and there is no doubt that the result is similar to the previous study in  
15 Xinjiang <sup>10</sup>. In addition, the prevalence rate of obesity was significantly different among Han, Uygur  
16 and Kazak groups and the prevalence in Kazak group was significantly higher compared with Han  
17 and Uygur. Overall, our findings indicate that 16.3% of Han, 11.2% of Uygur, and 9.1% of Kazak  
18 people more than 35 years of age in Xinjiang have overweight, as with 7.4% of Han, 9.3% of Uygur,  
19 and 9.8% of Kazak people have obesity. Xinjiang is a multi-ethnic co-populated area in China. The  
20 national census showed that there are 47 ethnicities in Xinjiang, and 13 of them are confirmed to be  
21 native ethnicities, such as the Uygur and Kazak. The explanations for this increase of prevalence as  
22 follows: firstly, Kazak live in the grassland and forests, whose dietary habits were characterized by  
23 eating more animal and consuming fewer fresh vegetables; Secondly, Kazak is a nomadic ethnic  
24 who usually lives in hypoxia area and high altitude where the climate is cold and dry; Thirdly,  
25 different genetic backgrounds may also be an important factor underlying the different prevalence  
26 of obesity <sup>26</sup>.

27 Multivariable logistic regression analysis suggested that several factors are associated with the  
28 prevalence of overweight and obesity. A previous review revealed that various marital transitions  
29 are related with changes in body weight: transition into marriage appears to be associated with

1 weight gain, whereas transition out of marriage is associated with weight loss<sup>27</sup>. Our study found a  
2 similar result that, transition into marriage including married, divorce and widowed are risk factors  
3 for becoming overweight and obese. Plausible explanations are behaviors and lifestyle which differ  
4 among married individuals, however, the exact mechanism is not clear to illustrate this apparent  
5 association with marriage status. In our study, it is also found that different educational levels,  
6 occupations and area of residence are closely related to body weight. We have observed that low  
7 education level is a risk factor because of insufficient level of cognition. Urban population,  
8 especially unemployed, retiree, student and full-time housewife, are easier to become overweight  
9 and obese, which contribute to urban working conditions, for example sitting in the office, fast-  
10 paced life and supermarket or fast food restaurant availability<sup>28</sup>.

11 The 2015 Global Burden of Disease Study, representing 195 countries and territories, estimated  
12 that 25.0% of men and 5.4% of women worldwide smoked daily, which is the leading preventable  
13 cause of death worldwide<sup>29</sup>. In this study, we found a lower prevalence of overweight and obesity  
14 in smokers than non-smokers, which is consistent with studies conducted in Switzerland, India and  
15 Jilin, China<sup>21 30 31</sup>. In addition, reasonable explanations to illustrate the issue according to two  
16 different criteria. In terms of tobacco use, using tobacco is connected with multiple system functions,  
17 especially cardiovascular and digestive systems<sup>32</sup>. In terms of the organism itself, smoking has been  
18 considered as methods of pressure and energy relief. Affected by the traditional culture of drinking  
19 alcohol, especially in northwest China, it is generally believed that, the more you drink, the more  
20 weight you get. Wang et al<sup>21</sup> showed the consistent results.

21 To the best of our knowledge, obesity is an independent risk factor both of CVD and death<sup>33-</sup>  
22 <sup>35</sup>. We explore that the prevalence of overweight and obesity are higher if subjects are with  
23 hypertension or diabetes or dyslipidemia. The results provide a compelling reason why the  
24 occurrence of obesity is combined with cardiovascular risk factors such as hypertension, diabetes  
25 or dyslipidemia. Previous studies reported that the benefits of weight loss are well established,  
26 with a 5–10% reduction in weight associated with improvement in health and quality of life, and a  
27 3% reduction being positive for health improvement where it is maintained<sup>36</sup>.

28 These departments should heed the high prevalence of overweight and obesity in Xinjiang  
29 Province and provide effective guidelines to help to reverse the trend. The main strengths of our



1 study are its large sample size and precise physical measurements, which increase the validity of  
2 our results. However, the present study has several limitations. First, the main limitation is the  
3 cross-sectional design which prohibits inferring a causal link between overweight and obesity and  
4 risk factors. As in cross-sectional studies data on exposure and outcome are gathered  
5 simultaneously in a specific time point, prospective studies are necessary to confirm our findings.  
6 In addition, self-reported data and the nature of cross-sectional data may lead to recall and  
7 reporting biases, which may be the reason for the insignificant difference in the causes of obesity.  
8 Finally, other indicators of adiposity, such as body fat percentage and waist circumference which  
9 plenty of studies reported to reflect the prevalence of overweight and obesity and body fat  
10 distribution, were not obtained in our study<sup>37 38</sup>.

## 11 **Conclusions**

12 In conclusion, the present study indicates that the prevalence of overweight and obesity  
13 among adult residents in Xinjiang, the northwest China, is very high during the past years.  
14 Furthermore, the main influencing factors for overweight and obesity are sex, age, race, marriage  
15 status, education level, occupation, smoking, drinking, hypertension, diabetes and dyslipidemia.  
16 These data suggest that efforts toward prevention and control of overweight and obesity should be  
17 a public health priority in the northwest of China, which will be submitted to relevant departments  
18 as a reference to reverse the trends.

19 **Funding:** This study was supported by grants from Xinjiang Science and Technology Support  
20 Project (2016E02072), the Natural Science Foundation of China (81660058, 81770363,  
21 U1503322), the Special Funds for the Key Laboratory of Xinjiang Autonomous Region in China  
22 (2018D04029), and Graduate Research Innovation Project of Xinjiang Autonomous region  
23 (CXCY2018026).

24 **Acknowledgments:** We thank the Project on Present Situation and the Cardiovascular Risk  
25 Survey (CRS) study in Xinjiang Province of China for providing necessary data.

26 **Contributors:** Conceived and designed the experiments: Yining Yang, Xiaomei Li. Performed the  
27 experiments: Ning Song, Fen Liu. Analyzed the data: Min Han, Qiang Zhao, Qian Zhao.  
28 Contributed reagents/materials/analysis tools: Xiangmei Li, Guoli Du, Hui Zhai. Quality control the  
29 study and revision: Yining Yang, Xiaomei Li. Wrote the paper: Ning Song. All authors read and



1 approved the final manuscript.

2 **Conflicts of Interest:** The authors declare no conflict of interest.

3 **Ethics approval:** This study was carried out in accordance with the Declaration of Helsinki and  
4 the study protocol was approved by the Ethics Committee of the First Affiliated Hospital of  
5 Xinjiang Medical University (Xinjiang, China) (approval ID:20100116-01).

6 **Data availability statement:** All data relevant to the study are included in the article or uploaded  
7 as supplementary information. No additional data are available.

## 8 **References**

- 9 1. De Luca M, Angrisani L, Himpens J, et al. Indications for Surgery for Obesity and Weight-  
10 Related Diseases: Position Statements from the International Federation for the Surgery of Obesity  
11 and Metabolic Disorders (IFSO). *Obesity surgery* 2016;26(8):1659-96 doi: 10.1007/s11695-016-  
12 2271-4[published Online First: Epub Date]].
- 13 2. Collaboration NCDRF. Trends in adult body-mass index in 200 countries from 1975 to 2014: a  
14 pooled analysis of 1698 population-based measurement studies with 19.2 million participants.  
15 *Lancet* 2016;387(10026):1377-96 doi: 10.1016/S0140-6736(16)30054-X[published Online First:  
16 Epub Date]].
- 17 3. Pineda E, Sanchez-Romero LM, Brown M, et al. Forecasting Future Trends in Obesity across  
18 Europe: The Value of Improving Surveillance. *Obesity facts* 2018;11(5):360-71 doi:  
19 10.1159/000492115[published Online First: Epub Date]].
- 20 4. Addo PN, Nyarko KM, Sackey SO, et al. Prevalence of obesity and overweight and associated  
21 factors among financial institution workers in Accra Metropolis, Ghana: a cross sectional study.  
22 *BMC research notes* 2015;8:599 doi: 10.1186/s13104-015-1590-1[published Online First: Epub  
23 Date]].
- 24 5. Lee DH, Keum N, Hu FB, et al. Comparison of the association of predicted fat mass, body mass  
25 index, and other obesity indicators with type 2 diabetes risk: two large prospective studies in US  
26 men and women. *European journal of epidemiology* 2018;33(11):1113-23 doi: 10.1007/s10654-  
27 018-0433-5[published Online First: Epub Date]].
- 28 6. Flegal KM, Kit BK, Orpana H, et al. Association of all-cause mortality with overweight and  
29 obesity using standard body mass index categories: a systematic review and meta-analysis. *Jama*  
30 2013;309(1):71-82 doi: 10.1001/jama.2012.113905[published Online First: Epub Date]].
- 31 7. Wang H, Zhai F. Programme and policy options for preventing obesity in China. *Obesity*  
32 *reviews : an official journal of the International Association for the Study of Obesity* 2013;14  
33 Suppl 2:134-40 doi: 10.1111/obr.12106[published Online First: Epub Date]].
- 34 8. Lao XQ, Ma WJ, Sobko T, et al. Dramatic escalation in metabolic syndrome and cardiovascular  
35 risk in a Chinese population experiencing rapid economic development. *BMC public health*  
36 2014;14:983 doi: 10.1186/1471-2458-14-983[published Online First: Epub Date]].
- 37 9. Ferretti F, Mariani M. Simple vs. Complex Carbohydrate Dietary Patterns and the Global  
38 Overweight and Obesity Pandemic. *International journal of environmental research and public*  
39 *health* 2017;14(10) doi: 10.3390/ijerph14101174[published Online First: Epub Date]].
- 40 10. Lek N, Yan W, Zhang Y, et al. Indices of central and general obesity and cardiometabolic risk

- 1 among adolescents in three ethnic groups in north-west China. *Annals of human biology* 2016;43(1):18-24 doi: 10.3109/03014460.2015.1014418[published Online First: Epub Date]].
- 2 11. Xie X, Ma YT, Yang YN, et al. Alcohol consumption and ankle-to-brachial index: results  
3 from the Cardiovascular Risk Survey. *PloS one* 2010;5(12):e15181 doi:  
4 10.1371/journal.pone.0015181[published Online First: Epub Date]].
- 5 12. Awareness t, control of diabetes mellitus and the risk factors: survey results from northeast  
6 China Kilpi, F., Webber L, Musaigner A, et al. Alarming predictions for obesity and non-  
7 communicable diseases in the Middle East. *Public health nutrition* 2014;17(5):1078-86 doi:  
8 10.1017/S1368980013000840[published Online First: Epub Date]].
- 9 13. Wang C, Yu Y, Zhang X, et al. Awareness, treatment, control of diabetes mellitus and the risk  
10 factors: survey results from northeast China. *PloS one* 2014;9(7):e103594 doi:  
11 10.1371/journal.pone.0103594[published Online First: Epub Date]].
- 12 14. McManus RJ, Caulfield M, Williams B, et al. NICE hypertension guideline 2011: evidence  
13 based evolution. *Bmj* 2012;344:e181 doi: 10.1136/bmj.e181[published Online First: Epub Date]].
- 14 15. Davies MJ, D'Alessio DA, Fradkin J, et al. Management of Hyperglycemia in Type 2  
15 Diabetes, 2018. A Consensus Report by the American Diabetes Association (ADA) and the  
16 European Association for the Study of Diabetes (EASD). *Diabetes care* 2018;41(12):2669-701  
17 doi: 10.2337/dci18-0033[published Online First: Epub Date]].
- 18 16. Alshamiri M, Ghanaim MMA, Barter P, et al. Expert opinion on the applicability of  
19 dyslipidemia guidelines in Asia and the Middle East. *International journal of general medicine*  
20 2018;11:313-22 doi: 10.2147/IJGM.S160555[published Online First: Epub Date]].
- 21 17. Lavie CJ, Arena R, Alpert MA, et al. Management of cardiovascular diseases in patients with  
22 obesity. *Nature reviews Cardiology* 2018;15(1):45-56 doi: 10.1038/nrcardio.2017.108[published  
23 Online First: Epub Date]].
- 24 18. Rummo P, Kanchi R, Perlman S, et al. Correction to: Change in Obesity Prevalence among  
25 New York City Adults: the NYC Health and Nutrition Examination Survey, 2004 and 2013-2014.  
26 *Journal of urban health : bulletin of the New York Academy of Medicine* 2018;95(6):800 doi:  
27 10.1007/s11524-018-0310-2[published Online First: Epub Date]].
- 28 19. Collaborators GBDO, Afshin A, Forouzanfar MH, et al. Health Effects of Overweight and  
29 Obesity in 195 Countries over 25 Years. *The New England journal of medicine* 2017;377(1):13-27  
30 doi: 10.1056/NEJMoa1614362[published Online First: Epub Date]].
- 31 20. Vogelzangs N, Kritchevsky SB, Beekman AT, et al. Obesity and onset of significant  
32 depressive symptoms: results from a prospective community-based cohort study of older men and  
33 women. *The Journal of clinical psychiatry* 2010;71(4):391-9 doi:  
34 10.4088/JCP.08m04743blu[published Online First: Epub Date]].
- 35 21. Wang R, Zhang P, Gao C, et al. Prevalence of overweight and obesity and some associated  
36 factors among adult residents of northeast China: a cross-sectional study. *BMJ open*  
37 2016;6(7):e010828 doi: 10.1136/bmjopen-2015-010828[published Online First: Epub Date]].
- 38 22. Kontsevaya A, Shalnova S, Deev A, et al. Overweight and Obesity in the Russian Population:  
39 Prevalence in Adults and Association with Socioeconomic Parameters and Cardiovascular Risk  
40 Factors. *Obesity facts* 2019;12(1):103-14 doi: 10.1159/000493885[published Online First: Epub  
41 Date]].
- 42 23. Catala-Lopez F, Genova-Maleras R. [Prevention and control of chronic non-communicable  
43 diseases in Spain: A call to action]. *Medicina clinica* 2013;140(11):502-3 doi:  
44

- 1  
2  
3  
4 1 10.1016/j.medcli.2012.11.006[published Online First: Epub Date]].  
5 2 24. Carroll DD, Blanck HM, Serdula MK, et al. Obesity, physical activity, and depressive  
6 3 symptoms in a cohort of adults aged 51 to 61. *Journal of aging and health* 2010;22(3):384-98 doi:  
7 4 10.1177/0898264309359421[published Online First: Epub Date]].  
8 5 25. Mc Hugh S, O'Neill C, Browne J, et al. Body mass index and health service utilisation in the  
9 6 older population: results from The Irish Longitudinal Study on Ageing. *Age and ageing*  
10 7 2015;44(3):428-34 doi: 10.1093/ageing/afu177[published Online First: Epub Date]].  
11 8 26. Wang YT, Adi D, Yu ZX, et al. The burden and correlates of hypertension among Chinese  
12 9 rural population in Han, Uyгур, and Kazak: a cross-sectional study. *Journal of the American*  
13 10 *Society of Hypertension : JASH* 2017;11(11):737-45 e3 doi: 10.1016/j.jash.2017.09.010[published  
14 11 Online First: Epub Date]].  
15 12 27. Dinour L, Leung MM, Tripicchio G, et al. The Association between Marital Transitions, Body  
16 13 Mass Index, and Weight: A Review of the Literature. *Journal of obesity* 2012;2012:294974 doi:  
17 14 10.1155/2012/294974[published Online First: Epub Date]].  
18 15 28. Saelens BE, Glanz K, Frank LD, et al. Two-Year Changes in Child Weight Status, Diet, and  
19 16 Activity by Neighborhood Nutrition and Physical Activity Environment. *Obesity*  
20 17 2018;26(8):1338-46 doi: 10.1002/oby.22247[published Online First: Epub Date]].  
21 18 29. Collaborators GBDT. Smoking prevalence and attributable disease burden in 195 countries  
22 19 and territories, 1990-2015: a systematic analysis from the Global Burden of Disease Study 2015.  
23 20 *Lancet* 2017;389(10082):1885-906 doi: 10.1016/S0140-6736(17)30819-X[published Online First:  
24 21 Epub Date]].  
25 22 30. Marques-Vidal P, Bochud M, Mooser V, et al. Prevalence of obesity and abdominal obesity in  
26 23 the Lausanne population. *BMC public health* 2008;8:330 doi: 10.1186/1471-2458-8-  
27 24 330[published Online First: Epub Date]].  
28 25 31. Siddiquee T, Bhowmik B, Da Vale Moreira NC, et al. Prevalence of obesity in a rural Asian  
29 26 Indian (Bangladeshi) population and its determinants. *BMC public health* 2015;15:860 doi:  
30 27 10.1186/s12889-015-2193-4[published Online First: Epub Date]].  
31 28 32. Torigian DA, Green-McKenzie J, Liu X, et al. A Study of the Feasibility of FDG-PET/CT to  
32 29 Systematically Detect and Quantify Differential Metabolic Effects of Chronic Tobacco Use in  
33 30 Organs of the Whole Body-A Prospective Pilot Study. *Academic radiology* 2017;24(8):930-40  
34 31 doi: 10.1016/j.acra.2016.09.003[published Online First: Epub Date]].  
35 32 33. Global BMIMC, Di Angelantonio E, Bhupathiraju Sh N, et al. Body-mass index and all-cause  
36 33 mortality: individual-participant-data meta-analysis of 239 prospective studies in four continents.  
37 34 *Lancet* 2016;388(10046):776-86 doi: 10.1016/S0140-6736(16)30175-1[published Online First:  
38 35 Epub Date]].  
39 36 34. Lassale C, Tzoulaki I, Moons KGM, et al. Separate and combined associations of obesity and  
40 37 metabolic health with coronary heart disease: a pan-European case-cohort analysis. *European*  
41 38 *heart journal* 2018;39(5):397-406 doi: 10.1093/eurheartj/ehx448[published Online First: Epub  
42 39 Date]].  
43 40 35. Fan J, Song Y, Chen Y, et al. Combined effect of obesity and cardio-metabolic abnormality on  
44 41 the risk of cardiovascular disease: a meta-analysis of prospective cohort studies. *International*  
45 42 *journal of cardiology* 2013;168(5):4761-8 doi: 10.1016/j.ijcard.2013.07.230[published Online  
46 43 First: Epub Date]].  
47 44 36. Espeland MA, Glick HA, Bertoni A, et al. Impact of an intensive lifestyle intervention on use  
48  
49  
50  
51  
52  
53  
54  
55  
56  
57  
58  
59  
60

1 and cost of medical services among overweight and obese adults with type 2 diabetes: the action  
2 for health in diabetes. *Diabetes care* 2014;37(9):2548-56 doi: 10.2337/dc14-0093[published  
3 Online First: Epub Date].

4 37. Zeng Q, Dong SY, Sun XN, et al. Percent body fat is a better predictor of cardiovascular risk  
5 factors than body mass index. *Brazilian journal of medical and biological research = Revista*  
6 *brasileira de pesquisas medicas e biologicas* 2012;45(7):591-600

7 38. Ramirez-Velez R, Correa-Bautista JE, Gonzalez-Ruiz K, et al. The Role of Body Adiposity  
8 Index in Determining Body Fat Percentage in Colombian Adults with Overweight or Obesity.  
9 *International journal of environmental research and public health* 2017;14(10) doi:  
10 10.3390/ijerph14101093[published Online First: Epub Date].  
11

12 **Table 1 Prevalence of overweight and obesity according to demographic characteristics**

| Characteristic    | N    | Overweight |          |         | Obesity       |          |         |
|-------------------|------|------------|----------|---------|---------------|----------|---------|
|                   |      | n ( % )    | $\chi^2$ | P       | n ( % )       | $\chi^2$ | P       |
| <b>Sex</b>        |      |            |          |         |               |          |         |
| Male              | 6819 | 2735(40.1) | 71.1     | <0.001* | 1856 ( 27.2 ) | 3.7      | 0.05    |
| Female            | 7799 | 2603(33.4) |          |         | 2013(25.8)    |          |         |
| <b>Age(years)</b> |      |            |          |         |               |          |         |
| 35-44             | 5425 | 1866(34.4) | 20.3     | <0.001* | 1146(21.1)    | 149.8    | <0.001* |
| 45-54             | 3759 | 1441(38.3) |          |         | 1153(30.7)    |          |         |
| 55-64             | 2932 | 1067(36.4) |          |         | 919(31.3)     |          |         |
| ≥65               | 2502 | 964(38.5)  |          |         | 651(26.0)     |          |         |
| <b>Area</b>       |      |            |          |         |               |          |         |
| Urban             | 7974 | 3163(39.7) | 75.1     | <0.001* | 1956(24.5)    | 33.9     | <0.001* |
| Rural             | 6644 | 2175(32.7) |          |         | 1913(28.8)    |          |         |
| <b>Ethnicity</b>  |      |            |          |         |               |          |         |
| Han               | 5757 | 2380(16.3) | 99.1     | <0.001* | 1082(7.4)     | 331.9    | <0.001* |
| Uyghur            | 4767 | 1635(11.2) |          |         | 1361(9.3)     |          |         |
| Kazak             | 4094 | 1323(9.1)  |          |         | 1426(9.8)     |          |         |
| <b>Occupation</b> |      |            |          |         |               |          |         |
| Manual            | 4583 | 1760(12.0) | 12.1     | 0.002*  | 1095(7.5)     | 32.1     | <0.001* |
| White collar      | 7751 | 2736(18.7) |          |         | 2086(14.3)    |          |         |

|                             |       |            |      |         |             |       |         |  |
|-----------------------------|-------|------------|------|---------|-------------|-------|---------|--|
| Other                       | 2284  | 842(5.8)   |      |         | 688(4.7)    |       |         |  |
| <b>Education</b>            |       |            |      |         |             |       |         |  |
| Primary school and below    | 5805  | 1993(13.6) | 26.9 | <0.001* | 1589(10.87) | 21.2  | <0.001* |  |
| Junior middle school        | 3094  | 1196(8.2)  |      |         | 844(5.8)    |       |         |  |
| Senior middle school        | 4556  | 1676(11.5) |      |         | 1191(8.2)   |       |         |  |
| Undergraduate and above     | 1163  | 473(3.2)   |      |         | 245(1.7)    |       |         |  |
| <b>Marriage</b>             |       |            |      |         |             |       |         |  |
| Unmarried                   | 192   | 59(0.4)    | 14.1 | <0.001* | 27(0.2)     | 23.1  | <0.001* |  |
| Married                     | 12988 | 4795(32.8) |      |         | 3427(23.4)  |       |         |  |
| divorced                    | 201   | 53(0.4)    |      |         | 47(0.2)     |       |         |  |
| widowed                     | 1237  | 431(3.0)   |      |         | 368(2.5)    |       |         |  |
| <b>Drinking</b>             |       |            |      |         |             |       |         |  |
| Yes                         | 4169  | 923(6.3)   | 44.5 | <0.001* | 663(4.5)    | 24.6  | <0.001* |  |
| No                          | 10449 | 4415(30.2) |      |         | 3206(21.9)  |       |         |  |
| <b>Smoking</b>              |       |            |      |         |             |       |         |  |
| Yes                         | 2151  | 1688(11.6) | 39.7 | <0.001* | 1101(7.5)   | 0.01  | 0.92    |  |
| No                          | 12467 | 3650(25.0) |      |         | 2768(18.9)  |       |         |  |
| <b>Hypertension</b>         |       |            |      |         |             |       |         |  |
| Yes                         | 5701  | 2138(14.6) | 3.9  | 0.05    | 2155(14.7)  | 616.8 | <0.001* |  |
| No                          | 8917  | 3200(21.9) |      |         | 1714(11.7)  |       |         |  |
| <b>Diabetes</b>             |       |            |      |         |             |       |         |  |
| Yes                         | 859   | 335(2.3)   | 2.4  | 0.1     | 317(2.2)    | 51.0  | <0.001* |  |
| No                          | 13759 | 5003(34.2) |      |         | 3552(24.3)  |       |         |  |
| <b>Dyslipidemia</b>         |       |            |      |         |             |       |         |  |
| <b>hypertriglyceridemia</b> |       |            |      |         |             |       |         |  |
| Yes                         | 4113  | 1724(11.8) | 72.0 | <0.001* | 1497(10.2)  | 289.9 | <0.001* |  |
| No                          | 10505 | 3614(24.7) |      |         | 2372(16.2)  |       |         |  |

**hypercholesterolemia**

|     |      |            |      |        |           |       |         |
|-----|------|------------|------|--------|-----------|-------|---------|
| Yes | 3787 | 1469(10.1) | 11.4 | 0.001* | 1267(8.7) | 128.3 | <0.001* |
|-----|------|------------|------|--------|-----------|-------|---------|

|    |       |            |  |  |            |  |  |
|----|-------|------------|--|--|------------|--|--|
| No | 10831 | 3869(26.5) |  |  | 2602(17.8) |  |  |
|----|-------|------------|--|--|------------|--|--|

**High LDL-C**

|     |      |            |      |     |           |     |       |
|-----|------|------------|------|-----|-----------|-----|-------|
| Yes | 5251 | 1921(13.1) | 0.02 | 0.9 | 1334(9.1) | 4.8 | 0.03* |
|-----|------|------------|------|-----|-----------|-----|-------|

|    |      |            |  |  |            |  |  |
|----|------|------------|--|--|------------|--|--|
| No | 9367 | 3417(23.4) |  |  | 2535(17.3) |  |  |
|----|------|------------|--|--|------------|--|--|

**Low HDL-C**

|     |      |            |     |        |           |     |      |
|-----|------|------------|-----|--------|-----------|-----|------|
| Yes | 4437 | 1704(11.7) | 9.8 | 0.002* | 1215(8.3) | 2.8 | 0.09 |
|-----|------|------------|-----|--------|-----------|-----|------|

|    |       |            |  |  |            |  |  |
|----|-------|------------|--|--|------------|--|--|
| No | 10831 | 3634(24.9) |  |  | 2654(18.2) |  |  |
|----|-------|------------|--|--|------------|--|--|

1 Categorical variables are presented as counts and percentages. HDL-c, high density lipoprotein-cholesterol; LDL-c, low density lipoprotein-cholesterol.

2 Date were compared by  $\chi^2$  tests. \* $P < 0.05$ , Statistically significant.

5 **Table 2 Prevalence of overweight and obesity in men and women according to age group**

| Age<br>(years) | Overweight |           | <i>P</i> | Obesity   |           | <i>P</i> |
|----------------|------------|-----------|----------|-----------|-----------|----------|
|                | Male(%)    | female(%) |          | male(%)   | female(%) |          |
| 35-44          | 994(40.2)  | 872(29.5) | <0.001   | 631(25.5) | 515(17.4) | <0.001   |
| 45-54          | 735(43.1)  | 706(34.4) |          | 517(30.3) | 636(31.0) |          |
| 55-64          | 476(35.8)  | 591(36.8) |          | 389(29.3) | 531(33.0) |          |
| ≥65            | 530(40.3)  | 434(36.5) |          | 319(24.3) | 332(27.9) |          |

6 Date were compared by  $\chi^2$  tests. \* $P < 0.05$ , Statistically significant.

8 **Table 3 Prevalence of overweight and obesity in Han, Uyghur and Kazak according to age**

| Age<br>(years) | group      |           |           |         |           |           | <i>P</i>  |        |
|----------------|------------|-----------|-----------|---------|-----------|-----------|-----------|--------|
|                | Overweight |           |           | Obesity |           |           |           |        |
|                | Han(%)     | Uyghur(%) | Kazak(%)  | Han(%)  | Uyghur(%) | Kazak(%)  |           |        |
| 35-44          | 712(35.0)  | 573(34.6) | 581(33.6) | <0.001  | 273(13.4) | 422(25.5) | 451(26.1) | <0.001 |
| 45-54          | 599(43.9)  | 481(38.1) | 361(31.9) |         | 246(18.0) | 436(34.5) | 471(41.6) |        |
| 55-64          | 497(45.9)  | 354(32.6) | 216(28.3) |         | 268(24.7) | 318(29.3) | 333(43.6) |        |
| ≥65            | 572(45.0)  | 227(29.9) | 165(35.1) |         | 295(23.2) | 185(24.3) | 171(36.4) |        |

10 Date were compared by  $\chi^2$  tests. \* $P < 0.05$ , Statistically significant.

1

2 **Table 4 Multivariable regression analysis of correlates of overweight and obesity in residents**  
 3 **of Xinjiang Province**

| Characteristic           | B    | S.E. | Wald | df | P       | OR   | 95%CI   |
|--------------------------|------|------|------|----|---------|------|---------|
| <b>Area</b>              | -0.1 | 0.04 | 10.4 | 1  | 0.001*  | 0.9  | 0.8-0.9 |
| <b>Sex</b>               | -0.3 | 0.05 | 32.5 | 1  | <0.001* | 0.8  | 0.7-0.8 |
| <b>Ethnic</b>            |      |      | 94.4 | 2  | <0.001* |      |         |
| Han                      | -    | -    | -    | -  | -       | 1    | -       |
| Uygur                    | 0.4  | 0.05 | 50.0 | 1  | <0.001* | 1.4  | 1.3-1.6 |
| Kazakh                   | 0.50 | 0.05 | 86.2 | 1  | <0.001* | 1.7  | 1.5-1.8 |
| <b>Age(years)</b>        |      |      | 71.2 | 3  | <0.001* |      |         |
| 35-44                    | -    | -    | -    | -  | -       | 1    | -       |
| 45-54                    | 0.4  | 0.05 | 62.8 | 1  | <0.001* | 1.5  | 1.3-1.6 |
| 55-64                    | 0.3  | 0.05 | 24.6 | 1  | <0.001* | 1.3  | 1.2-1.5 |
| ≥65                      | 0.1  | 0.06 | 3.1  | 1  | 0.08    | 1.11 | 1.0-1.3 |
| <b>Education</b>         |      |      | 17.9 | 3  | <0.001* |      |         |
| Primary school and below | -    | -    | -    | -  | -       | 1    | -       |
| Junior middle school     | 0.2  | 0.05 | 15.6 | 1  | <0.001* | 1.2  | 1.1-1.4 |
| Senior middle school     | 0.2  | 0.06 | 7.0  | 1  | 0.008*  | 1.2  | 1.0-1.3 |
| Undergraduate and above  | 0.2  | 0.08 | 6.8  | 1  | 0.009*  | 1.3  | 1.1-1.5 |
| <b>Occupation</b>        |      |      | 10.4 | 2  | 0.006*  |      |         |
| Manual                   | -    | -    | -    | -  | -       | 1    | -       |
| White collar             | 0.01 | 0.05 | 0.04 | 1  | 0.8     | 1.0  | 0.9-1.1 |
| Other                    | 0.2  | 0.06 | 7.9  | 1  | 0.005*  | 1.2  | 1.1-1.4 |
| <b>Marriage</b>          |      |      | 26.5 | 3  | <0.001  |      |         |
| Unmarried                | -    | -    | -    | -  | -       | 1    | -       |
| Married                  | 0.6  | 0.2  | 15.5 | 1  | <0.001* | 1.8  | 1.4-2.5 |
| Divorced                 | 0.1  | 0.2  | 0.2  | 1  | 0.7     | 1.1  | 0.7-1.7 |
| widowed                  | 0.6  | 0.2  | 12.4 | 1  | <0.001* | 1.8  | 1.3-2.5 |



|                      |      |      |       |   |         |     |         |
|----------------------|------|------|-------|---|---------|-----|---------|
| <b>Smoking</b>       | -0.2 | 0.05 | 9.0   | 1 | 0.003*  | 0.9 | 0.8-0.9 |
| <b>Drinking</b>      | 0.4  | 0.06 | 34.8  | 1 | <0.001* | 1.5 | 1.3-1.6 |
| <b>Hypertension</b>  | 0.8  | 0.04 | 340.4 | 1 | <0.001* | 2.1 | 2.0-2.3 |
| <b>Diabetes</b>      | 0.3  | 0.09 | 10.4  | 1 | 0.001*  | 1.3 | 1.1-1.6 |
| <b>Dyslipidemia</b>  |      |      |       |   |         |     |         |
| hypertriglyceridemia | 0.9  | 0.05 | 371.4 | 1 | <0.001* | 2.4 | 2.2-2.7 |
| hypercholesterolemia | 0.2  | 0.05 | 20.9  | 1 | <0.001* | 1.2 | 1.1-1.3 |
| Low HDL-C            | 0.1  | 0.04 | 6.4   | 1 | 0.01*   | 1.1 | 1.0-1.2 |
| High LDL-C           | 0.02 | 0.04 | 0.16  | 1 | 0.69    | 1.0 | 0.9-1.1 |
| <b>Constant</b>      | -1.0 | 0.2  | 35.3  | 1 | <0.001  | -   | -       |

1 \* $P < 0.05$ , Statistically significant.



Supplementary Table 1 Prevalence of underweight

| Characteristic | N    | Underweight |        |
|----------------|------|-------------|--------|
|                |      | n (%)       | P      |
| <b>Sex</b>     |      |             |        |
| Male           | 6819 | 71(1.04)    | <0.001 |
| Female         | 7799 | 219(2.81)   |        |

\* $P < 0.05$ , Statistically significant.

For peer review only

## STROBE Statement—checklist of items that should be included in reports of observational studies

|                              | Item No | Recommendation                                                                                                                                                                                                                                                                                                                                                                                                                                                                                                                                                                                                                                                                                                                            |
|------------------------------|---------|-------------------------------------------------------------------------------------------------------------------------------------------------------------------------------------------------------------------------------------------------------------------------------------------------------------------------------------------------------------------------------------------------------------------------------------------------------------------------------------------------------------------------------------------------------------------------------------------------------------------------------------------------------------------------------------------------------------------------------------------|
| <b>Title and abstract</b>    | 1       | (a) Indicate the study's design with a commonly used term in the title or the abstract ( <a href="#">On page 1, line 1</a> )<br>(b) Provide in the abstract an informative and balanced summary of what was done and what was found ( <a href="#">On page 2</a> )                                                                                                                                                                                                                                                                                                                                                                                                                                                                         |
| <b>Introduction</b>          |         |                                                                                                                                                                                                                                                                                                                                                                                                                                                                                                                                                                                                                                                                                                                                           |
| Background/rationale         | 2       | Explain the scientific background and rationale for the investigation being reported ( <a href="#">On page 2, line 2-5</a> )                                                                                                                                                                                                                                                                                                                                                                                                                                                                                                                                                                                                              |
| Objectives                   | 3       | State specific objectives, including any prespecified hypotheses ( <a href="#">On page 2, line 2-5</a> )                                                                                                                                                                                                                                                                                                                                                                                                                                                                                                                                                                                                                                  |
| <b>Methods</b>               |         |                                                                                                                                                                                                                                                                                                                                                                                                                                                                                                                                                                                                                                                                                                                                           |
| Study design                 | 4       | Present key elements of study design early in the paper ( <a href="#">On page 4, line 9</a> )                                                                                                                                                                                                                                                                                                                                                                                                                                                                                                                                                                                                                                             |
| Setting                      | 5       | Describe the setting, locations, and relevant dates, including periods of recruitment, exposure, follow-up, and data collection ( <a href="#">On page 2, line 7</a> )                                                                                                                                                                                                                                                                                                                                                                                                                                                                                                                                                                     |
| Participants                 | 6       | (a) <i>Cohort study</i> —Give the eligibility criteria, and the sources and methods of selection of participants. Describe methods of follow-up<br><i>Case-control study</i> —Give the eligibility criteria, and the sources and methods of case ascertainment and control selection. Give the rationale for the choice of cases and controls<br><i>Cross-sectional study</i> —Give the eligibility criteria, and the sources and methods of selection of participants ( <a href="#">On page 4, line 9-20</a> )<br>(b) <i>Cohort study</i> —For matched studies, give matching criteria and number of exposed and unexposed<br><i>Case-control study</i> —For matched studies, give matching criteria and the number of controls per case |
| Variables                    | 7       | Clearly define all outcomes, exposures, predictors, potential confounders, and effect modifiers. Give diagnostic criteria, if applicable ( <a href="#">On page 5,6</a> )                                                                                                                                                                                                                                                                                                                                                                                                                                                                                                                                                                  |
| Data sources/<br>measurement | 8*      | For each variable of interest, give sources of data and details of methods of assessment (measurement). Describe comparability of assessment methods if there is more than one group ( <a href="#">On page 4,5</a> )                                                                                                                                                                                                                                                                                                                                                                                                                                                                                                                      |
| Bias                         | 9       | Describe any efforts to address potential sources of bias ( <a href="#">On page 11, line 1-3</a> )                                                                                                                                                                                                                                                                                                                                                                                                                                                                                                                                                                                                                                        |
| Study size                   | 10      | Explain how the study size was arrived at ( <a href="#">On page 4, line 15-16</a> )                                                                                                                                                                                                                                                                                                                                                                                                                                                                                                                                                                                                                                                       |
| Quantitative variables       | 11      | Explain how quantitative variables were handled in the analyses. If applicable, describe which groupings were chosen and why ( <a href="#">On page 4,5</a> )                                                                                                                                                                                                                                                                                                                                                                                                                                                                                                                                                                              |
| Statistical methods          | 12      | (a) Describe all statistical methods, including those used to control for confounding ( <a href="#">On page 6</a> )<br>(b) Describe any methods used to examine subgroups and interactions<br>(c) Explain how missing data were addressed<br>(d) <i>Cohort study</i> —If applicable, explain how loss to follow-up was addressed<br><i>Case-control study</i> —If applicable, explain how matching of cases and controls was addressed<br><i>Cross-sectional study</i> —If applicable, describe analytical methods taking account of sampling strategy ( <a href="#">On page 6</a> )<br>(e) Describe any sensitivity analyses                                                                                                             |

1  
2  
3  
4  
5  
6  
7  
8  
9  
10  
11  
12  
13  
14  
15  
16  
17  
18  
19  
20  
21  
22  
23  
24  
25  
26  
27  
28  
29  
30  
31  
32  
33  
34  
35  
36  
37  
38  
39  
40  
41  
42  
43  
44  
45  
46  
47  
48  
49  
50  
51  
52  
53  
54  
55  
56  
57  
58  
59  
60

Continued on next page

For peer review only

| <b>Results</b>           |     |                                                                                                                                                                                                                                                                                                                                                                                                                                                                               |
|--------------------------|-----|-------------------------------------------------------------------------------------------------------------------------------------------------------------------------------------------------------------------------------------------------------------------------------------------------------------------------------------------------------------------------------------------------------------------------------------------------------------------------------|
| Participants             | 13* | (a) Report numbers of individuals at each stage of study—eg numbers potentially eligible, examined for eligibility, confirmed eligible, included in the study, completing follow-up, and analysed ( <a href="#">On page 4, line 15-16</a> )<br>(b) Give reasons for non-participation at each stage<br>(c) Consider use of a flow diagram                                                                                                                                     |
| Descriptive data         | 14* | (a) Give characteristics of study participants (eg demographic, clinical, social) and information on exposures and potential confounders ( <a href="#">On page 14, Table1</a> )<br>(b) Indicate number of participants with missing data for each variable of interest<br>(c) <i>Cohort study</i> —Summarise follow-up time (eg, average and total amount)                                                                                                                    |
| Outcome data             | 15* | <i>Cohort study</i> —Report numbers of outcome events or summary measures over time<br><i>Case-control study</i> —Report numbers in each exposure category, or summary measures of exposure<br><i>Cross-sectional study</i> —Report numbers of outcome events or summary measures ( <a href="#">On page 6-7</a> )                                                                                                                                                             |
| Main results             | 16  | (a) Give unadjusted estimates and, if applicable, confounder-adjusted estimates and their precision (eg, 95% confidence interval). Make clear which confounders were adjusted for and why they were included ( <a href="#">On page 6,7</a> )<br>(b) Report category boundaries when continuous variables were categorized<br>(c) If relevant, consider translating estimates of relative risk into absolute risk for a meaningful time period ( <a href="#">On page 6,7</a> ) |
| Other analyses           | 17  | Report other analyses done—eg analyses of subgroups and interactions, and sensitivity analyses ( <a href="#">On page 6,7</a> )                                                                                                                                                                                                                                                                                                                                                |
| <b>Discussion</b>        |     |                                                                                                                                                                                                                                                                                                                                                                                                                                                                               |
| Key results              | 18  | Summarise key results with reference to study objectives ( <a href="#">On page 8</a> )                                                                                                                                                                                                                                                                                                                                                                                        |
| Limitations              | 19  | Discuss limitations of the study, taking into account sources of potential bias or imprecision. Discuss both direction and magnitude of any potential bias ( <a href="#">On page 10,11</a> )                                                                                                                                                                                                                                                                                  |
| Interpretation           | 20  | Give a cautious overall interpretation of results considering objectives, limitations, multiplicity of analyses, results from similar studies, and other relevant evidence ( <a href="#">On page 11</a> )                                                                                                                                                                                                                                                                     |
| Generalisability         | 21  | Discuss the generalisability (external validity) of the study results ( <a href="#">On page 11</a> )                                                                                                                                                                                                                                                                                                                                                                          |
| <b>Other information</b> |     |                                                                                                                                                                                                                                                                                                                                                                                                                                                                               |
| Funding                  | 22  | Give the source of funding and the role of the funders for the present study and, if applicable, for the original study on which the present article is based ( <a href="#">On page 11</a> )                                                                                                                                                                                                                                                                                  |

\*Give information separately for cases and controls in case-control studies and, if applicable, for exposed and unexposed groups in cohort and cross-sectional studies.

**Note:** An Explanation and Elaboration article discusses each checklist item and gives methodological background and published examples of transparent reporting. The STROBE checklist is best used in conjunction with this article (freely available on the Web sites of PLoS Medicine at <http://www.plosmedicine.org/>, Annals of Internal Medicine at <http://www.annals.org/>, and Epidemiology at <http://www.epidem.com/>). Information on the STROBE Initiative is available at [www.strobe-statement.org](http://www.strobe-statement.org).

# BMJ Open

## Prevalence of overweight and obesity and associated risk factors among adult residents of northwest China: A cross-sectional study

|                               |                                                                                                                                                                                                                                                                                                                                                                                                                                                                                                                                                                                                                                                                                                                                                                                                                                                                                                                                                                                                                                                                                                                                                                                                                                                                                                                                                                                                                                                                                                                                                                                                                                                                                                                                                                                                                                                                                                                                                                                                                                                                                                                                                                                                                                                                                                                                                                                                                                                                                                            |
|-------------------------------|------------------------------------------------------------------------------------------------------------------------------------------------------------------------------------------------------------------------------------------------------------------------------------------------------------------------------------------------------------------------------------------------------------------------------------------------------------------------------------------------------------------------------------------------------------------------------------------------------------------------------------------------------------------------------------------------------------------------------------------------------------------------------------------------------------------------------------------------------------------------------------------------------------------------------------------------------------------------------------------------------------------------------------------------------------------------------------------------------------------------------------------------------------------------------------------------------------------------------------------------------------------------------------------------------------------------------------------------------------------------------------------------------------------------------------------------------------------------------------------------------------------------------------------------------------------------------------------------------------------------------------------------------------------------------------------------------------------------------------------------------------------------------------------------------------------------------------------------------------------------------------------------------------------------------------------------------------------------------------------------------------------------------------------------------------------------------------------------------------------------------------------------------------------------------------------------------------------------------------------------------------------------------------------------------------------------------------------------------------------------------------------------------------------------------------------------------------------------------------------------------------|
| Journal:                      | <i>BMJ Open</i>                                                                                                                                                                                                                                                                                                                                                                                                                                                                                                                                                                                                                                                                                                                                                                                                                                                                                                                                                                                                                                                                                                                                                                                                                                                                                                                                                                                                                                                                                                                                                                                                                                                                                                                                                                                                                                                                                                                                                                                                                                                                                                                                                                                                                                                                                                                                                                                                                                                                                            |
| Manuscript ID                 | bmjopen-2018-028131.R3                                                                                                                                                                                                                                                                                                                                                                                                                                                                                                                                                                                                                                                                                                                                                                                                                                                                                                                                                                                                                                                                                                                                                                                                                                                                                                                                                                                                                                                                                                                                                                                                                                                                                                                                                                                                                                                                                                                                                                                                                                                                                                                                                                                                                                                                                                                                                                                                                                                                                     |
| Article Type:                 | Original research                                                                                                                                                                                                                                                                                                                                                                                                                                                                                                                                                                                                                                                                                                                                                                                                                                                                                                                                                                                                                                                                                                                                                                                                                                                                                                                                                                                                                                                                                                                                                                                                                                                                                                                                                                                                                                                                                                                                                                                                                                                                                                                                                                                                                                                                                                                                                                                                                                                                                          |
| Date Submitted by the Author: | 19-Jul-2019                                                                                                                                                                                                                                                                                                                                                                                                                                                                                                                                                                                                                                                                                                                                                                                                                                                                                                                                                                                                                                                                                                                                                                                                                                                                                                                                                                                                                                                                                                                                                                                                                                                                                                                                                                                                                                                                                                                                                                                                                                                                                                                                                                                                                                                                                                                                                                                                                                                                                                |
| Complete List of Authors:     | <p>Song, Ning; Xinjiang Medical University Affiliated First Hospital, Department of Cardiology; Xinjiang Key Laboratory of Cardiovascular Disease Research, Clinical Medicine Institute, The First Affiliated Hospital of Xinjiang Medical University</p> <p>Fen, Liu; Xinjiang Medical University Affiliated First Hospital, Department of Cardiology; Xinjiang Key Laboratory of Cardiovascular Disease Research, Clinical Medicine Institute, The First Affiliated Hospital of Xinjiang Medical University</p> <p>Han, Min; Xinjiang Medical University Affiliated First Hospital, Department of Cardiology; Xinjiang Key Laboratory of Cardiovascular Disease Research, Clinical Medicine Institute, The First Affiliated Hospital of Xinjiang Medical University</p> <p>Zhao, Qiang; Xinjiang Medical University Affiliated First Hospital, Department of Cardiology; Xinjiang Key Laboratory of Cardiovascular Disease Research, Clinical Medicine Institute, The First Affiliated Hospital of Xinjiang Medical University</p> <p>Zhao, Qian; Xinjiang Medical University Affiliated First Hospital, Department of Cardiology; Xinjiang Key Laboratory of Cardiovascular Disease Research</p> <p>Zhai, Hui; Xinjiang Medical University Affiliated First Hospital, Department of Cardiology; Xinjiang Key Laboratory of Cardiovascular Disease Research, Clinical Medicine Institute, The First Affiliated Hospital of Xinjiang Medical University</p> <p>Li, Xiangmei; Xinjiang Medical University Affiliated First Hospital, Department of Cardiology; Xinjiang Key Laboratory of Cardiovascular Disease Research, Clinical Medicine Institute, The First Affiliated Hospital of Xinjiang Medical University</p> <p>Du, Guoli; Xinjiang Medical University Affiliated First Hospital, Department of Cardiology; Xinjiang Key Laboratory of Cardiovascular Disease Research, Clinical Medicine Institute, The First Affiliated Hospital of Xinjiang Medical University</p> <p>Li, Xiao-Mei; Xinjiang Medical University Affiliated First Hospital, Department of Cardiology; Xinjiang Key Laboratory of Cardiovascular Disease Research, Clinical Medicine Institute, The First Affiliated Hospital of Xinjiang Medical University</p> <p>Yang, Yi-Ning; Xinjiang Medical University Affiliated First Hospital, Department of Cardiology; Xinjiang Key Laboratory of Cardiovascular Disease Research, Clinical Medicine Institute, The First Affiliated Hospital of Xinjiang Medical University</p> |

1  
2  
3  
4  
5  
6  
7  
8  
9  
10  
11  
12  
13  
14  
15  
16  
17  
18  
19  
20  
21  
22  
23  
24  
25  
26  
27  
28  
29  
30  
31  
32  
33  
34  
35  
36  
37  
38  
39  
40  
41  
42  
43  
44  
45  
46  
47  
48  
49  
50  
51  
52  
53  
54  
55  
56  
57  
58  
59  
60

|                                   |                                                              |
|-----------------------------------|--------------------------------------------------------------|
| <b>Primary Subject Heading:</b>   | Public health                                                |
| <b>Secondary Subject Heading:</b> | Cardiovascular medicine, Epidemiology, Ethics, Global health |
| <b>Keywords:</b>                  | cross-sectional survey, overweight, obesity, risk factors    |
|                                   |                                                              |



1  
2  
3  
4 1 **Prevalence of overweight and obesity and associated risk factors among adult residents of**  
5  
6 2 **northwest China: A cross-sectional study**

7  
8 3 Ning Song<sup>1,2+</sup>, Fen Liu<sup>1,2+</sup>, Min Han<sup>1,2</sup>, Qiang Zhao<sup>1,2</sup>, Qian Zhao<sup>1,2</sup>, Hui Zhai<sup>1,2</sup>, Xiangmei Li<sup>1,2</sup>,  
9  
10 4 Guoli Du<sup>1,2</sup>, Xiaomei Li<sup>1,2,\*</sup>, and Yining Yang<sup>1,2,\*</sup>

11  
12  
13 5 1 Department of Cardiology, The First Affiliated Hospital of Xinjiang Medical University, Urumqi,  
14  
15 6 China;

16  
17  
18 7 2 Xinjiang Key Laboratory of Cardiovascular Disease Research, Clinical Medicine Institute, The  
19  
20 8 First Affiliated Hospital of Xinjiang Medical University, Urumqi, China.

21  
22  
23 9 + These authors have contributed equally to this work.

24  
25  
26 10 **\*Corresponding Author**

27  
28  
29 11 Full name: Xiaomei Li

30  
31  
32 12 Institute: Xinjiang Key Laboratory of Cardiovascular Disease Research, Urumqi, China.

33  
34  
35 13 Department: Department of Cardiology, The First Affiliated Hospital of Xinjiang Medical  
36  
37 14 University.

38  
39  
40 15 Street Name & Number: 137 Liyushan South Road, Urumqi, 830054, China.

41  
42  
43 16 Telephone: 18690897592 Fax number: 0991-4362611 e-mail: [lixm505@163.com](mailto:lixm505@163.com).

44  
45  
46 17 Full name: Yining Yang

47  
48  
49 18 Institute: Xinjiang Key Laboratory of Cardiovascular Disease Research, Urumqi, China.

50  
51  
52 19 Department: Department of Cardiology, The First Affiliated Hospital of Xinjiang Medical  
53  
54 20 University.

55  
56  
57 21 Street Name & Number: 137 Liyushan South Road, Urumqi, 830054, China.

58  
59  
60 22 Tel: 86-991-4361690 Fax: 86-991-4365330 E-mail: [yangyn5126@163.com](mailto:yangyn5126@163.com).

1  
2  
3  
4 15  
6  
7 2 **Abstract**

8 3 **Objective:** Overweight and obesity have been shown to be related to multiple chronic conditions,  
9 4 leading to a heavy economic burden on society throughout the world. This study aims to estimate  
10 5 the prevalence of overweight and obesity and determine potential influencing factors among adults  
11 6 in Xinjiang, northwest China.

12 7 **Design:** A community-based observational study.

13 8 **Setting:** The First Affiliated Hospital of Xinjiang Medical University.

14 9 **Methods:** In total, 14,618 adult participants (7,799 males; 6,819 females) over 35 years old were  
15 10 recruited from the Cardiovascular Risk Survey conducted in 2010. Data were obtained from face-  
16 11 to-face interviews and physical examinations. The sample was used to estimate the prevalence of  
17 12 overweight (body mass index (BMI) [24-28] kg/m<sup>2</sup>) and obesity (BMI≥28 kg/m<sup>2</sup>) in Xinjiang  
18 13 Province. Influencing factors were analysed based on statistical methods.

19 14 **Results:** In Xinjiang Province, the overall prevalence of overweight was 36.5% (male 40.1%;  
20 15 female 33.4%), and the prevalence of obesity was 26.5% (male 27.2%; female 25.8%). The  
21 16 prevalence of both overweight and obesity were higher in women than in men ( $P<0.001$ ). The  
22 17 main influencing factors for overweight and obesity were sex, age, race, marital status, education  
23 18 level, occupation, smoking, drinking, hypertension, diabetes and dyslipidaemia ( $P<0.05$ ).

24 19 **Conclusions:** This study estimated that the prevalence of overweight and obesity among adult  
25 20 residents of Xinjiang Province, northwest China, was high. These data suggest that efforts related  
26 21 to the prevention and control of overweight and obesity should be a public health priority in  
27 22 northwest China.

28 23 **Keywords:** cross-sectional survey, overweight, obesity, risk factors

29 24 **Strengths and limitations of this study**

- 30 25 ➤ The survey sample was demographically representative of Uygur adults with obesity who are  
31 26 35–80 years old and reside in Xinjiang.
- 32 27 ➤ The main strengths of our study are its large sample size and precise physical measurements,  
33 28 which increase the validity of our results.
- 34 29 ➤ Due to the cross-sectional nature of the study and the self-designed questionnaire, indicators



1 and experience could have been affected by bias.

2 ➤ Moreover, other indicators of adiposity, such as body-fat percentage and waist  
3 circumference, were not obtained in our study.

4 ➤ The results were from Xinjiang only and therefore cannot be generalised to all of China.

## 6 **Introduction**

7 Obesity is a complex chronic global disease affecting people worldwide across all ages, sexes,  
8 ethnicities, and nationalities, and it is the fifth leading cause of mortality globally <sup>1 2</sup>. According to  
9 the World Health Organization (WHO), the prevalence of worldwide obesity has doubled in more  
10 than 70 countries since 1980 <sup>3</sup>. Moreover, this trend has continuously increased in most other  
11 countries. In 2013, in order to draw physicians' attention to the condition, the American Medical  
12 Association classified obesity as a disease <sup>4</sup>.

13 Body mass index (BMI), which is calculated as weight/height squared ( $\text{kg}/\text{m}^2$ ), is a common  
14 and accepted measure that is used to report obesity rates. While BMI is not a true measure of  
15 adiposity, it is simple to use in health screenings and epidemiological surveys <sup>5</sup>. According to the  
16 WHO, obesity is defined as a  $\text{BMI} \geq 30 \text{ kg}/\text{m}^2$ , and overweight as a BMI of  $[25-30) \text{ kg}/\text{m}^2$  <sup>6</sup>. For  
17 Chinese people, a  $\text{BMI} \geq 28 \text{ kg}/\text{m}^2$  suggests obesity and a BMI of  $[24-28) \text{ kg}/\text{m}^2$  indicates overweight  
18 <sup>7</sup>.

19 China is the largest developing country and has the largest population in the world. With rapid  
20 economic growth and changes in lifestyle, such as dietary habits and physical activity <sup>8</sup>, the  
21 epidemiological data indicate that individuals with overweight and obesity have a higher prevalence  
22 of traditional diseases, including dyslipidaemia, hypertension, cardiovascular disease, insulin  
23 resistance or diabetes, fatty liver disease, and psychosocial complications and some cancers <sup>5 9</sup>.  
24 Located in northwest China, Xinjiang is not only an autonomous minority ethnic region within the  
25 People's Republic of China, but also one of the fastest developing regions in China. It is the largest  
26 Chinese administrative division and spans over 1.66 million  $\text{km}^2$ , which represents approximately  
27 one-sixth of the country's territory. A few studies had reported the prevalence of overweight among  
28 adults in Xinjiang <sup>10</sup>. Nevertheless, the samples in the abovementioned studies were small, and those  
29 results cannot accurately represent the status of overweight and obesity in the whole region of

1  
2  
3  
4 1 Xinjiang.

5 2 In the present study, we estimated the prevalence of overweight and obesity in Xinjiang,  
6 3 northwestern part of China. Furthermore, we investigated the associated factors of overweight and  
7 4 obesity, which will be regarded as a reference for policy makers to make informed decisions.

## 11 5 **Materials and Methods**

### 13 6 **Ethics approval**

15 7 This study was conducted according to the standards of the Declaration of Helsinki. Written  
16 8 informed consent was acquired from each participant prior to enrolment. Ethics approval was  
17 9 granted by the Ethics Committee of the First Affiliated Hospital of Xinjiang Medical University  
18 10 (the approval ID: 20100116-01).

### 23 11 **Study design and population**

25 12 This survey is a population-based cross-sectional program and the Cardiovascular Risk Survey  
26 13 (CRS) study was conducted in Xinjiang Province of China in 2010. Previously, several studies had  
27 14 described in details <sup>11-14</sup>. The CRS was a prospective, multiple-ethnicity and community-based  
28 15 observational study designed to investigate the prevalence and risk factors for cardiovascular disease  
29 16 (CVD) in the Han, Uygur and Kazakh populations in Xinjiang Province <sup>11</sup>. All participants we  
30 17 recruited had lived in Xinjiang for more than one year. In short, a total of 16,460 adults aged  $\geq 35$   
31 18 years have been joined the CRS, 14,618 subjects (5,757 Han, 4,767 Uygur and 4,094 Kazakh  
32 19 Chinese) of them completed the investigation. We adopt the method of multistage stratified  
33 20 sampling to randomly select the representative sample from 6 different administrative regions,  
34 21 including Urumqi, Yili, Hetian, Kalamayi, Fukang and Turpan.

### 44 22 **Data collection**

46 23 The standard survey mainly consisted of two aspects <sup>15</sup>, one is the face-to-face interview, the  
47 24 other is the physical examination. Before launching the regular survey, it is necessary to carry out a  
48 25 pre-survey to ensure the accuracy and feasibility of the questionnaire. At the investigation stage,  
49 26 two independent investigators ensured the validity of every survey questionnaire. In the  
50 27 questionnaire processing stage, we used parallel double method to handle data, and carried out three  
51 28 validations to verify the self-contradictory responses. The questionnaire provided demographics,  
52 29 general personal information and medical histories <sup>16</sup>. Height and weight were measured adopting

1 the standards. Height was measured to the nearest 0.1 cm, and weight was measured with a standard  
2 scale in the upright position to the nearest 0.1 kg<sup>15</sup>. Smoking and drinking habits were self-reported.

3 Blood samples were collected in examination centres at local hospitals in the participants'  
4 residential area. The collected and detected methods have also been described in detail previously  
5<sup>13 14</sup>. At the time of the in-person interview, a 5 mL fasting venous blood was collected into EDTA  
6 tubes and separated to acquire plasma within 4 h. Finally, all samples after processing were stored  
7 at -80°C immediately. We measured the biochemical markers in plasma using the equipment for  
8 chemical analysis (Dimension AR/AVL Clinical Chemistry System, Newark, NJ, USA), operated  
9 by the Clinical Laboratory Department of the First Affiliated Hospital of Xinjiang Medical  
10 University. Relevant markers in plasma, which contained total cholesterol (TC), triglycerides (TG),  
11 high-density lipoprotein cholesterol (HDL-C) and low-density lipoprotein cholesterol (LDL-C),  
12 were measured.

### 13 **Definition of variables**

14 Overweight and obesity were defined by the Chinese standards mentioned above. Obesity was  
15 defined as BMI $\geq$ 28 kg/m<sup>2</sup>, and overweight was defined as a BMI of [24-28) kg/m<sup>2</sup>.

16 Education was classified into four levels: primary school and below (including never having  
17 attended school and elementary schooling only); junior middle school; senior middle school  
18 (including secondary vocational schooling); undergraduate and above (including post-secondary  
19 vocational schooling, master's degree and doctoral degree). The occupations consist of three parts:  
20 manual labour (including farmers, production and service workers), white-collar occupations  
21 (including office and other technical employment) and other occupations (including unemployed,  
22 retiree, student and full-time homemaker)<sup>17</sup>. Smoking-status classifications included current  
23 smokers (who had smoked at least one cigarette a day over the past 30 days) and never-smokers.  
24 Drinking-status classifications included current drinkers (who had consumed more than one  
25 alcoholic drink a week) and never-drinkers. Hypertension was defined as mean systolic BP $\geq$ 140  
26 mmHg, mean diastolic BP $\geq$ 90 mmHg, and/or current use of antihypertensive medications<sup>14 18</sup>.  
27 Diabetes was defined as fasting plasma glucose $\geq$ 126 mg/dL ( $\geq$ 7.0 mmol/L), self-reported history of  
28 diabetes and/or current use of insulin or antidiabetic medications<sup>14 19</sup>. Hypercholesterolemia was  
29 defined as serum total cholesterol level $>$ 6.22 mmol/L (240 mg/dL), and hypertriglyceridemia was

1 defined as serum triglyceride level >2.26 mmol/L (200 mg/dL). A serum LDL-C level of >4.14  
2 mmol/L (160 mg/dL) was defined as high LDL-C, and a serum HDL-C level of <1.04 mmol/L (40  
3 mg/dL) was defined as low HDL-C. In total, dyslipidaemia was defined as the existence of at least  
4 one of the four abnormal lipid concentrations mentioned above or self-reported use of lipid-lowering  
5 drugs<sup>13 20</sup>.

## 6 **Statistical analysis**

7 Data were entered and corrected by 2 staff members using EpiData 3.02 software (EpiData,  
8 Association, Odense, Denmark). The subjects' continuous variables were expressed by frequency  
9 distributions, meanwhile, the prevalence rates were shown through the percentage. Chi-square  
10 testing ( $\chi^2$ ) was used to compare the prevalence of overweight and obesity in different groups. To  
11 analyse the factors associated with obesity and adjust for potential confounding effects,  
12 multivariable logistic regression analyses were carried out to explain independent factors associated  
13 with overweight and obesity. ORs with 95% CIs were used for the risk analysis. All statistical  
14 analyses were conducted using the complex sampling function of Social Sciences SPSS for  
15 Windows version 22.0 (SPSS, Inc, Chicago, IL, USA), with a  $P < 0.05$  indicating statistical  
16 significance.

## 17 **Patient and public involvement**

18 This survey is a population-based cross-sectional program and the Cardiovascular Risk  
19 Survey (CRS) study was conducted in Xinjiang Province of China in 2010. The study was  
20 designed to investigate the prevalence of overweight and obesity among adult residents in  
21 Xinjiang in northwest China. However, no patients or members of the public were included in the  
22 design, recruitment or conduct of the study. The results were to be disseminated to participants  
23 after the study was completed by the study team. The burden of intervention would not be  
24 assessed by the patients themselves.

## 25 **Results**

26 In this survey, we interviewed 14618 residents aged 35 to 101 years (mean age: 50.8±12.6  
27 years), including 6,819 (46.6%) men and 7,799 (53.4%) women. Among these participants, 5,757  
28 (39.4%) were Han, with a mean age of 52.5±12.7 years; 4,767 (32.6%) were Uygur, with a mean  
29 age of 50.7±13.0 years; and 4,094 (28.0%) were Kazakh, with a mean age of 48.6±11.7 years.

1  
2  
3  
4 1 According to the BMI classification for Chinese people, the overall prevalence of overweight was  
5 2 36.5% (male 40.1%; female 33.4%), and the prevalence of obesity was 26.5% (male 27.2%; female  
6 3 25.8%) in Xinjiang Province (**Table 1**). There were differences in age, area, race, occupation,  
7 4 education, marriage, drinking habits, hypertension history and plasma levels of TG and TC between  
8 5 the overweight and obesity groups, while there were no significant differences in sex, smoking,  
9 6 diabetes history and the level of LDL-c and HDL-C between the 2 groups.

10 7 From the age-stratified and gender-stratified results in **Table 2**, for men, the prevalence of both  
11 8 overweight and obesity peaked at 45-54 years, while a significant trend indicating an increase in the  
12 9 prevalence of overweight with age was not demonstrated. For women, the prevalence of overweight  
13 10 and obesity increased with age, peaking at 55-64 years, though there was a slight decrease at  $\geq 65$   
14 11 years. In addition, a higher proportion of enrolled males were overweight than females. Interestingly,  
15 12 the proportion of females who were obese was higher than that of males.

16 13 From the age-stratified and race-stratified results in **Table 3**, as a whole, obesity prevalence was  
17 14 found to be the highest among the Kazakh participants and the lowest among Han participants. The  
18 15 differences among the three ethnic groups were statistically significant ( $P < 0.001$ ). Further,  
19 16 overweight prevalence was also significantly different among the three ethnicities, with the highest  
20 17 rate among Han participants and the lowest among Kazakh participants.

21 18 We divided the participants into two groups: normal weight and overweight/obese. **Table 1**  
22 19 shows that the following factors all had a significant effect on overweight/obese: age, area, race,  
23 20 education, marital status, occupation, drinking, hypertension and dyslipidaemia ( $P < 0.05$ ). We  
24 21 applied multivariable unconditional logistic regression analysis to all of the identified risk factors  
25 22 and attempted to identify any existing differences in these risk factors that could explain the  
26 23 difference in overweight and obesity prevalence. **Table 4** shows the results of logistic regression  
27 24 models comparing the prevalence of the potential risk factors: sex, age, area, marriage status,  
28 25 occupation, smoking, drinking, hypertension, diabetes and level of dyslipidaemia, including  
29 26 hypercholesterolemia, hypertriglyceridemia and low HDL-C. The multivariable logistic regression  
30 27 results reveal that female adults were more likely to become overweight and obese than male adults  
31 28 (OR 0.8, 95% CI 0.7 to 0.8). We categorised age into four groups, which clearly showed that  
32 29 increasing age was a risk factor for overweight/obesity, especially age 45-54 years (OR 1.5, 95%

1  
2  
3  
4 1 CI 1.3 to 1.6). Among the three ethnic groups, the Kazak participants (OR 1.7, 95% CI 1.5 to 1.8)  
5  
6 2 and Uygur participants (OR 1.4, 95% CI 1.3 to 1.6) were at higher risk of becoming overweight and  
7  
8 3 obese. Participants who were married (OR 1.8, 95% CI 1.4 to 2.5) or widowed (OR 1.8, 95% CI 1.3  
9  
10 4 to 2.5) were more likely to be overweight/obese than those who were unmarried. In addition,  
11  
12 5 smokers (OR 0.9, 95% CI 0.8 to 0.9) were less likely to become overweight and obese than non-  
13  
14 6 smokers. Participants who drank were more likely to become overweight or obese than those who  
15  
16 7 never or rarely drank (OR 1.5, 95% CI 1.3 to 1.6). Overweight and obesity were more common  
17  
18 8 among those who had hypertension (OR 2.1, 95% CI 2.0 to 2.3) and diabetes (OR 1.3, 95% CI 1.1  
19  
20 9 to 1.6) compared with those who had no hypertension and diabetes history. In the overweight and  
21  
22 10 obese group, hypertriglyceridemia (OR 2.4, 95% CI 2.2 to 2.7), hypercholesterolemia (OR 1.2, 95%  
23  
24 11 CI 1.1 to 1.3) and low HDL-C (OR 1.1, 95% CI 1.0 to 1.2) remained risk factors.

## 25 12 **Discussion**

26  
27 13 The epidemic of obesity is one of the most important health problems worldwide and is  
28  
29 14 estimated to be the second leading cause of preventable death in developed countries, behind  
30  
31 15 cigarette smoking <sup>21 22</sup>. The prevalence of overweight and obesity continues to increase around the  
32  
33 16 world, as have associated comorbidities and healthcare costs <sup>23</sup>. In the US, the prevalence of obesity  
34  
35 17 accounts for one-third of the general population, and another one-third is overweight <sup>24</sup>. The China  
36  
37 18 Chronic Disease Survey conducted by the Chinese Centre for Disease Control and Prevention  
38  
39 19 demonstrated that the prevalence of overweight among Chinese adults (age 18–64 years) in 2007  
40  
41 20 and 2010 was 26.6% and 30.6%, respectively (males, 27.4% and 32.1%; females, 25.7% and 29.1%),  
42  
43 21 and the prevalence of obesity was 7.7% and 12.1%, respectively (males, 6.7% and 12.5%; females,  
44  
45 22 8.7% and 11.1%) <sup>15</sup>. We found that the prevalence of both overweight and obesity was high. Our  
46  
47 23 cross-sectional study indicates that the prevalence of overweight and obesity among adults in  
48  
49 24 northwest China was 36.5% (males, 40.1%; females, 33.4%) and 26.5% (males, 27.2%; females,  
50  
51 25 25.8%), respectively. In the Russian population <sup>25</sup>, the prevalence of overweight was 64.6% (males,  
52  
53 26 42.3%; females, 28.7%), and approximately one-third of the participants (30.3%) were obese (males,  
54  
55 27 27.5%; females, 31.4%). Contrary to what was observed in our research, the prevalence of  
56  
57 28 overweight was higher than obesity in that study. This implies that overweight and obesity have a  
58  
59 29 higher prevalence in both sexes and are more common in northwest China and Russia than in other  
60

1  
2  
3  
4 1 areas, although effective actions might have been taken to control the upward trend <sup>26</sup>. The  
5  
6 2 prevalence of underweight (according to Chinese standards, underweight reflects <18.5 kg/m<sup>2</sup>) was  
7  
8 3 significantly different among the ethnic groups ( $P<0.05$ ) (**Supplementary Table 1**). However, due  
9  
10 4 to the special dietary habits (high-sugar and high-fat diet) and living habits in Xinjiang, the number  
11  
12 5 of low-weight people was too small to reliably detect differences.

13  
14 6 In this study, we found that the prevalence of both overweight and obesity was high in middle  
15  
16 7 age (45-64 years). Similarly, age gradients in the prevalence of obesity have been found in Russia  
17  
18 8 <sup>26</sup>. It is worth noting that more than half of all women aged 55–64 years were obese, and nearly 80%  
19  
20 9 of men in the group aged 45–54 years were overweight or obese, which is consistent with our age  
21  
22 10 gradients. Chinese people are more likely to have positive perceptions of obesity because it is  
23  
24 11 considered good fortune to become fat during middle age in traditional Chinese culture <sup>27</sup>. Moreover,  
25  
26 12 a large segment of the middle-aged and older adult population will be living with overweight and  
27  
28 13 obesity, which is associated with additional health impairments <sup>28</sup>.

29  
30 14 Through the present study, we found a very high prevalence of overweight and obesity in three  
31  
32 15 ethnicities in Xinjiang, and there is no doubt that this result is similar to those observed in the  
33  
34 16 previous study conducted in Xinjiang <sup>10</sup>. In addition, the prevalence rate of obesity was significantly  
35  
36 17 different among Han, Uygur and Kazak groups, as the prevalence in the Kazak group was  
37  
38 18 significantly higher compared with the Han and Uygur groups. Overall, our findings indicate that  
39  
40 19 16.3% of Han, 11.2% of Uygur, and 9.1% of Kazak people more than 35 years of age in Xinjiang  
41  
42 20 were overweight and that 7.4% of Han, 9.3% of Uygur, and 9.8% of Kazak people were obese.  
43  
44 21 Xinjiang is a multi-ethnic co-populated area in China. The national census showed that there are 47  
45  
46 22 ethnicities in Xinjiang, and 13 of them are confirmed to be native ethnicities, such as the Uygur and  
47  
48 23 Kazak. Explanations for this increase in prevalence are as follows: First, Kazak people live in the  
49  
50 24 grasslands and forests, and their dietary habits are characterised by eating more animals and  
51  
52 25 consuming fewer fresh vegetables. Second, the Kazak group is a nomadic ethnicity, the members of  
53  
54 26 which usually live in hypoxic areas and at high altitude where the climate is cold and dry. Third,  
55  
56 27 differences in genetic background may be an important factor underlying the differences in the  
57  
58 28 prevalence of obesity <sup>29</sup>.

59  
60 29 Multivariable logistic regression analysis showed that the prevalence of overweight and obesity



1  
2  
3  
4 1 was related to several factors. A previous review revealed that various marital transitions are related  
5  
6 2 with changes in body weight: transition into marriage appears to be associated with weight gain,  
7  
8 3 whereas transition out of marriage is associated with weight loss<sup>30</sup>. Our study found a similar result,  
9  
10 4 namely, that marriage-related transitions, including marrying, divorcing and being widowed, are  
11  
12 5 risk factors for becoming overweight and obese. A plausible explanation is that behaviours and  
13  
14 6 lifestyles differ among married and unmarried individuals, but the exact mechanism underlying this  
15  
16 7 association with marriage status is not clear. In our study, we also found that different educational  
17  
18 8 levels, occupations and areas of residence are closely related to body weight. We observed that a  
19  
20 9 low education level is a risk factor because of insufficient levels of cognition. Urban populations,  
21  
22 10 especially the unemployed, retirees, students and full-time housewives, are more likely to become  
23  
24 11 overweight and obese, which may be attributable to urban working conditions, for example, sitting  
25  
26 12 in an office and living a fast-paced life as well as supermarket or fast-food restaurant availability<sup>31</sup>.

27 13 The 2015 Global Burden of Disease Study, representing 195 countries and territories, estimated  
28  
29 14 that 25.0% of men and 5.4% of women worldwide smoked daily, which is the leading preventable  
30  
31 15 cause of death worldwide<sup>32</sup>. In this study, we found a lower prevalence of overweight and obesity  
32  
33 16 in smokers than in non-smokers, which is consistent with studies conducted in Switzerland, India  
34  
35 17 and Jilin, China<sup>15 33 34</sup>. In addition, reasonable explanations illustrate the issue based on two different  
36  
37 18 criteria. Using tobacco is associated with the function of multiple systems, especially that of  
38  
39 19 cardiovascular and digestive systems<sup>35</sup>. In terms of the organism itself, smoking has been  
40  
41 20 considered to be a method of relieving stress and anxiety. In northwest China in particular, it is  
42  
43 21 generally believed that the more you drink, the more weight you gain. Wang et al<sup>15</sup> found results  
44  
45 22 consistent with this belief.

46 23 To the best of our knowledge, obesity is an independent risk factor for both CVD and death  
47  
48 24<sup>36-38</sup>. We explored whether the prevalence of overweight and obesity is higher among subjects with  
49  
50 25 hypertension or diabetes or dyslipidaemia. The results provide a compelling reason why the  
51  
52 26 occurrence of obesity is combined with cardiovascular risk factors such as hypertension, diabetes  
53  
54 27 and dyslipidaemia. Previous studies reported that the benefits of weight loss are well established,  
55  
56 28 with a 5–10% reduction in weight associated with improvements in health and quality of life and a  
57  
58 29 3% reduction being positive for health improvement when maintained<sup>39</sup>.



1 Relevant departments should heed the high prevalence of overweight and obesity in Xinjiang  
2 Province and provide effective guidelines to help to reverse the trend. The main strengths of our  
3 study are its large sample size and precise physical measurements, which increase the validity of  
4 our results. However, the present study has several limitations. First, the main limitation is the  
5 cross-sectional design, which prohibits inferring a causal link between overweight and obesity and  
6 risk factors. As in cross-sectional studies, data on exposure and outcome are gathered  
7 simultaneously at a specific time point. Prospective studies are necessary to confirm our findings.  
8 In addition, self-reported data and the nature of cross-sectional data may lead to recall and  
9 reporting biases, which may be the reason for the non-significant difference in the causes of  
10 obesity. Finally, other indicators of adiposity, such as body-fat percentage and waist  
11 circumference, which many studies have noted reflect the prevalence of overweight, obesity and  
12 body-fat distribution, were not obtained in our study<sup>40 41</sup>.

### 13 **Conclusions**

14 In conclusion, the present study indicates that the prevalence of overweight and obesity  
15 among adult residents in Xinjiang in northwest China has been very high during the past years.  
16 Furthermore, the main influencing factors for overweight and obesity are sex, age, race, marital  
17 status, education level, occupation, smoking, drinking, hypertension, diabetes and dyslipidaemia.  
18 These data suggest that efforts related to the prevention and control of overweight and obesity  
19 should be a public health priority in the northwest of China. These findings will be submitted to  
20 relevant departments as a reference for efforts to reverse these trends.

21 **Funding:** This study was supported by grants from Xinjiang Science and Technology Support  
22 Project (2016E02072), the Natural Science Foundation of China (81660058, 81770363,  
23 U1503322), the Special Funds for the Key Laboratory of Xinjiang Autonomous Region in China  
24 (2018D04029), and Graduate Research Innovation Project of Xinjiang Autonomous region  
25 (CXCY2018026).

26 **Acknowledgments:** We thank the Project on Present Situation and the Cardiovascular Risk  
27 Survey (CRS) study in Xinjiang Province of China for providing necessary data.

28 **Contributors:** Conceived and designed the experiments: Yining Yang, Xiaomei Li. Performed the  
29 experiments: Ning Song, Fen Liu. Analyzed the data: Min Han, Qiang Zhao, Qian Zhao.

1  
2  
3  
4 1 Contributed reagents/materials/analysis tools: Xiangmei Li, Guoli Du, Hui Zhai. Quality control the  
5  
6 2 study and revision: Yining Yang, Xiaomei Li. Wrote the paper: Ning Song. All authors read and  
7  
8 3 approved the final manuscript.

9  
10 4 **Conflicts of Interest:** The authors declare no conflict of interest.

11  
12 5 **Ethics approval:** This study was carried out in accordance with the Declaration of Helsinki and  
13  
14 6 the study protocol was approved by the Ethics Committee of the First Affiliated Hospital of  
15  
16 7 Xinjiang Medical University (Xinjiang, China) (approval ID:20100116-01).

17  
18 8 **Data availability statement:** All data relevant to the study are included in the article or uploaded  
19  
20 9 as supplementary information. No additional data are available.

## 21 10 **References**

- 22  
23 11 1. De Luca M, Angrisani L, Himpens J, et al. Indications for Surgery for Obesity and Weight-  
24  
25 12 Related Diseases: Position Statements from the International Federation for the Surgery of Obesity  
26  
27 13 and Metabolic Disorders (IFSO). *Obesity surgery* 2016;26(8):1659-96 doi: 10.1007/s11695-016-  
28  
29 14 2271-4[published Online First: Epub Date]].  
30  
31 15 2. Collaboration NCDRF. Trends in adult body-mass index in 200 countries from 1975 to 2014: a  
32  
33 16 pooled analysis of 1698 population-based measurement studies with 19.2 million participants.  
34  
35 17 *Lancet* 2016;387(10026):1377-96 doi: 10.1016/S0140-6736(16)30054-X[published Online First:  
36  
37 18 Epub Date]].  
38  
39 19 3. Pineda E, Sanchez-Romero LM, Brown M, et al. Forecasting Future Trends in Obesity across  
40  
41 20 Europe: The Value of Improving Surveillance. *Obesity facts* 2018;11(5):360-71 doi:  
42  
43 21 10.1159/000492115[published Online First: Epub Date]].  
44  
45 22 4. Addo PN, Nyarko KM, Sackey SO, et al. Prevalence of obesity and overweight and associated  
46  
47 23 factors among financial institution workers in Accra Metropolis, Ghana: a cross sectional study.  
48  
49 24 *BMC research notes* 2015;8:599 doi: 10.1186/s13104-015-1590-1[published Online First: Epub  
50  
51 25 Date]].  
52  
53 26 5. Lee DH, Keum N, Hu FB, et al. Comparison of the association of predicted fat mass, body mass  
54  
55 27 index, and other obesity indicators with type 2 diabetes risk: two large prospective studies in US  
56  
57 28 men and women. *European journal of epidemiology* 2018;33(11):1113-23 doi: 10.1007/s10654-  
58  
59 29 018-0433-5[published Online First: Epub Date]].  
60  
30 6. Flegal KM, Kit BK, Orpana H, et al. Association of all-cause mortality with overweight and  
31  
32 31 obesity using standard body mass index categories: a systematic review and meta-analysis. *Jama*  
33  
34 32 2013;309(1):71-82 doi: 10.1001/jama.2012.113905[published Online First: Epub Date]].  
35  
36 33 7. Wang H, Zhai F. Programme and policy options for preventing obesity in China. *Obesity*  
37  
38 34 *reviews : an official journal of the International Association for the Study of Obesity* 2013;14  
39  
40 35 Suppl 2:134-40 doi: 10.1111/obr.12106[published Online First: Epub Date]].  
41  
42 36 8. Lao XQ, Ma WJ, Sobko T, et al. Dramatic escalation in metabolic syndrome and cardiovascular  
43  
44 37 risk in a Chinese population experiencing rapid economic development. *BMC public health*  
45  
46 38 2014;14:983 doi: 10.1186/1471-2458-14-983[published Online First: Epub Date]].  
47  
48 39 9. Ferretti F, Mariani M. Simple vs. Complex Carbohydrate Dietary Patterns and the Global  
49  
50  
51  
52  
53  
54  
55  
56  
57  
58  
59  
60

- 1  
2  
3  
4  
5  
6  
7  
8  
9  
10  
11  
12  
13  
14  
15  
16  
17  
18  
19  
20  
21  
22  
23  
24  
25  
26  
27  
28  
29  
30  
31  
32  
33  
34  
35  
36  
37  
38  
39  
40  
41  
42  
43  
44  
45  
46  
47  
48  
49  
50  
51  
52  
53  
54  
55  
56  
57  
58  
59  
60
- 1 Overweight and Obesity Pandemic. *International journal of environmental research and public health* 2017;14(10) doi: 10.3390/ijerph14101174[published Online First: Epub Date]].
  - 2  
3 10. Lek N, Yan W, Zhang Y, et al. Indices of central and general obesity and cardiometabolic risk  
4 among adolescents in three ethnic groups in north-west China. *Annals of human biology*  
5 2016;43(1):18-24 doi: 10.3109/03014460.2015.1014418[published Online First: Epub Date]].
  - 6 11. Xie X, Ma YT, Yang YN, et al. Alcohol consumption and ankle-to-brachial index: results  
7 from the Cardiovascular Risk Survey. *PloS one* 2010;5(12):e15181 doi:  
8 10.1371/journal.pone.0015181[published Online First: Epub Date]].
  - 9 12. Xie X, Ma YT, Yang YN, et al. Polymorphisms in the SAA1/2 gene are associated with  
10 carotid intima media thickness in healthy Han Chinese subjects: the Cardiovascular Risk Survey.  
11 *PloS one* 2010;5(11):e13997. doi: 10.1371/journal.pone.0013997 [published Online First:  
12 2010/11/26]
  - 13 13. Luo JY, Ma YT, Yu ZX, et al. Prevalence, awareness, treatment and control of dyslipidemia  
14 among adults in northwestern China: the cardiovascular risk survey. *Lipids Health Dis* 2014;13:4.  
15 doi: 10.1186/1476-511X-13-4 [published Online First: 2014/01/08]
  - 16 14. Liu F, Adi D, Xie X, et al. Prevalence of Isolated Diastolic Hypertension and Associated Risk  
17 Factors among Different Ethnicity Groups in Xinjiang, China. *PloS one* 2015;10(12):e0145325.  
18 doi: 10.1371/journal.pone.0145325
  - 19 15. Wang R, Zhang P, Gao C, et al. Prevalence of overweight and obesity and some associated  
20 factors among adult residents of northeast China: a cross-sectional study. *BMJ open*  
21 2016;6(7):e010828 doi: 10.1136/bmjopen-2015-010828[published Online First: Epub Date]].
  - 22 16. Awareness t, control of diabetes mellitus and the risk factors: survey results from northeast  
23 China Kilpi, F., Webber L, Musaigner A, et al. Alarming predictions for obesity and non-  
24 communicable diseases in the Middle East. *Public health nutrition* 2014;17(5):1078-86 doi:  
25 10.1017/S1368980013000840[published Online First: Epub Date]].
  - 26 17. Wang C, Yu Y, Zhang X, et al. Awareness, treatment, control of diabetes mellitus and the risk  
27 factors: survey results from northeast China. *PloS one* 2014;9(7):e103594 doi:  
28 10.1371/journal.pone.0103594[published Online First: Epub Date]].
  - 29 18. McManus RJ, Caulfield M, Williams B, et al. NICE hypertension guideline 2011: evidence  
30 based evolution. *Bmj* 2012;344:e181 doi: 10.1136/bmj.e181[published Online First: Epub Date]].
  - 31 19. Davies MJ, D'Alessio DA, Fradkin J, et al. Management of Hyperglycemia in Type 2  
32 Diabetes, 2018. A Consensus Report by the American Diabetes Association (ADA) and the  
33 European Association for the Study of Diabetes (EASD). *Diabetes care* 2018;41(12):2669-701  
34 doi: 10.2337/dci18-0033[published Online First: Epub Date]].
  - 35 20. Alshamiri M, Ghanaim MMA, Barter P, et al. Expert opinion on the applicability of  
36 dyslipidemia guidelines in Asia and the Middle East. *International journal of general medicine*  
37 2018;11:313-22 doi: 10.2147/IJGM.S160555[published Online First: Epub Date]].
  - 38 21. Lavie CJ, Arena R, Alpert MA, et al. Management of cardiovascular diseases in patients with  
39 obesity. *Nature reviews Cardiology* 2018;15(1):45-56 doi: 10.1038/nrcardio.2017.108[published  
40 Online First: Epub Date]].
  - 41 22. Rummo P, Kanchi R, Perlman S, et al. Correction to: Change in Obesity Prevalence among  
42 New York City Adults: the NYC Health and Nutrition Examination Survey, 2004 and 2013-2014.  
43 *Journal of urban health : bulletin of the New York Academy of Medicine* 2018;95(6):800 doi:  
44 10.1007/s11524-018-0310-2[published Online First: Epub Date]].

- 1  
2  
3  
4 1 23. Collaborators GBDO, Afshin A, Forouzanfar MH, et al. Health Effects of Overweight and  
5 2 Obesity in 195 Countries over 25 Years. *The New England journal of medicine* 2017;377(1):13-27  
6 3 doi: 10.1056/NEJMoa1614362[published Online First: Epub Date]].  
7 4 24. Vogelzangs N, Kritchevsky SB, Beekman AT, et al. Obesity and onset of significant  
8 5 depressive symptoms: results from a prospective community-based cohort study of older men and  
9 6 women. *The Journal of clinical psychiatry* 2010;71(4):391-9 doi:  
10 7 10.4088/JCP.08m04743blu[published Online First: Epub Date]].  
11 8 25. Kontsevaya A, Shalnova S, Deev A, et al. Overweight and Obesity in the Russian Population:  
12 9 Prevalence in Adults and Association with Socioeconomic Parameters and Cardiovascular Risk  
13 10 Factors. *Obesity facts* 2019;12(1):103-14 doi: 10.1159/000493885[published Online First: Epub  
14 11 Date]].  
15 12 26. Catala-Lopez F, Genova-Maleras R. [Prevention and control of chronic non-communicable  
16 13 diseases in Spain: A call to action]. *Medicina clinica* 2013;140(11):502-3 doi:  
17 14 10.1016/j.medcli.2012.11.006[published Online First: Epub Date]].  
18 15 27. Carroll DD, Blanck HM, Serdula MK, et al. Obesity, physical activity, and depressive  
19 16 symptoms in a cohort of adults aged 51 to 61. *Journal of aging and health* 2010;22(3):384-98 doi:  
20 17 10.1177/0898264309359421[published Online First: Epub Date]].  
21 18 28. Mc Hugh S, O'Neill C, Browne J, et al. Body mass index and health service utilisation in the  
22 19 older population: results from The Irish Longitudinal Study on Ageing. *Age and ageing*  
23 20 2015;44(3):428-34 doi: 10.1093/ageing/afu177[published Online First: Epub Date]].  
24 21 29. Wang YT, Adi D, Yu ZX, et al. The burden and correlates of hypertension among Chinese  
25 22 rural population in Han, Uygur, and Kazak: a cross-sectional study. *Journal of the American*  
26 23 *Society of Hypertension* : *JASH* 2017;11(11):737-45 e3 doi: 10.1016/j.jash.2017.09.010[published  
27 24 Online First: Epub Date]].  
28 25 30. Dinour L, Leung MM, Tripicchio G, et al. The Association between Marital Transitions, Body  
29 26 Mass Index, and Weight: A Review of the Literature. *Journal of obesity* 2012;2012:294974 doi:  
30 27 10.1155/2012/294974[published Online First: Epub Date]].  
31 28 31. Saelens BE, Glanz K, Frank LD, et al. Two-Year Changes in Child Weight Status, Diet, and  
32 29 Activity by Neighborhood Nutrition and Physical Activity Environment. *Obesity*  
33 30 2018;26(8):1338-46 doi: 10.1002/oby.22247[published Online First: Epub Date]].  
34 31 32. Collaborators GBDT. Smoking prevalence and attributable disease burden in 195 countries  
35 32 and territories, 1990-2015: a systematic analysis from the Global Burden of Disease Study 2015.  
36 33 *Lancet* 2017;389(10082):1885-906 doi: 10.1016/S0140-6736(17)30819-X[published Online First:  
37 34 Epub Date]].  
38 35 33. Marques-Vidal P, Bochud M, Mooser V, et al. Prevalence of obesity and abdominal obesity in  
39 36 the Lausanne population. *BMC public health* 2008;8:330 doi: 10.1186/1471-2458-8-  
40 37 330[published Online First: Epub Date]].  
41 38 34. Siddiquee T, Bhowmik B, Da Vale Moreira NC, et al. Prevalence of obesity in a rural Asian  
42 39 Indian (Bangladeshi) population and its determinants. *BMC public health* 2015;15:860 doi:  
43 40 10.1186/s12889-015-2193-4[published Online First: Epub Date]].  
44 41 35. Torigian DA, Green-McKenzie J, Liu X, et al. A Study of the Feasibility of FDG-PET/CT to  
45 42 Systematically Detect and Quantify Differential Metabolic Effects of Chronic Tobacco Use in  
46 43 Organs of the Whole Body-A Prospective Pilot Study. *Academic radiology* 2017;24(8):930-40  
47 44 doi: 10.1016/j.acra.2016.09.003[published Online First: Epub Date]].

- 1  
2  
3  
4  
5  
6  
7  
8  
9  
10  
11  
12  
13  
14  
15  
16  
17  
18  
19  
20  
21  
22  
23  
24  
25  
26  
27  
28  
29  
30  
31  
32  
33  
34  
35  
36  
37  
38  
39  
40  
41  
42  
43  
44  
45  
46  
47  
48  
49  
50  
51  
52  
53  
54  
55  
56  
57  
58  
59  
60
- 1 36. Global BMIMC, Di Angelantonio E, Bhupathiraju Sh N, et al. Body-mass index and all-cause mortality: individual-participant-data meta-analysis of 239 prospective studies in four continents. *Lancet* 2016;388(10046):776-86 doi: 10.1016/S0140-6736(16)30175-1[published Online First: Epub Date]].
- 2 37. Lassale C, Tzoulaki I, Moons KGM, et al. Separate and combined associations of obesity and metabolic health with coronary heart disease: a pan-European case-cohort analysis. *European heart journal* 2018;39(5):397-406 doi: 10.1093/eurheartj/ehx448[published Online First: Epub Date]].
- 3 38. Fan J, Song Y, Chen Y, et al. Combined effect of obesity and cardio-metabolic abnormality on the risk of cardiovascular disease: a meta-analysis of prospective cohort studies. *International journal of cardiology* 2013;168(5):4761-8 doi: 10.1016/j.ijcard.2013.07.230[published Online First: Epub Date]].
- 4 39. Espeland MA, Glick HA, Bertoni A, et al. Impact of an intensive lifestyle intervention on use and cost of medical services among overweight and obese adults with type 2 diabetes: the action for health in diabetes. *Diabetes care* 2014;37(9):2548-56 doi: 10.2337/dc14-0093[published Online First: Epub Date]].
- 5 40. Zeng Q, Dong SY, Sun XN, et al. Percent body fat is a better predictor of cardiovascular risk factors than body mass index. *Brazilian journal of medical and biological research = Revista brasileira de pesquisas medicas e biologicas* 2012;45(7):591-600
- 6 41. Ramirez-Velez R, Correa-Bautista JE, Gonzalez-Ruiz K, et al. The Role of Body Adiposity Index in Determining Body Fat Percentage in Colombian Adults with Overweight or Obesity. *International journal of environmental research and public health* 2017;14(10) doi: 10.3390/ijerph14101093[published Online First: Epub Date]].

26 **Table 1 Prevalence of overweight and obesity according to demographic characteristics**

| Characteristic     | N    | Overweight |          |         | Obesity       |          |         |
|--------------------|------|------------|----------|---------|---------------|----------|---------|
|                    |      | n ( % )    | $\chi^2$ | P       | n ( % )       | $\chi^2$ | P       |
| <b>Sex</b>         |      |            |          |         |               |          |         |
| Male               | 6819 | 2735(40.1) | 71.1     | <0.001* | 1856 ( 27.2 ) | 3.7      | 0.05    |
| Female             | 7799 | 2603(33.4) |          |         | 2013(25.8)    |          |         |
| <b>Age (years)</b> |      |            |          |         |               |          |         |
| 35-44              | 5425 | 1866(34.4) | 20.3     | <0.001* | 1146(21.1)    | 149.8    | <0.001* |
| 45-54              | 3759 | 1441(38.3) |          |         | 1153(30.7)    |          |         |
| 55-64              | 2932 | 1067(36.4) |          |         | 919(31.3)     |          |         |
| ≥65                | 2502 | 964(38.5)  |          |         | 651(26.0)     |          |         |

|                          |       |            |      |         |             |       |         |
|--------------------------|-------|------------|------|---------|-------------|-------|---------|
| <b>Area</b>              |       |            |      |         |             |       |         |
| Urban                    | 7974  | 3163(39.7) | 75.1 | <0.001* | 1956(24.5)  | 33.9  | <0.001* |
| Rural                    | 6644  | 2175(32.7) |      |         | 1913(28.8)  |       |         |
| <b>Ethnicity</b>         |       |            |      |         |             |       |         |
| Han                      | 5757  | 2380(16.3) | 99.1 | <0.001* | 1082(7.4)   | 331.9 | <0.001* |
| Uyghur                   | 4767  | 1635(11.2) |      |         | 1361(9.3)   |       |         |
| Kazak                    | 4094  | 1323(9.1)  |      |         | 1426(9.8)   |       |         |
| <b>Occupation</b>        |       |            |      |         |             |       |         |
| Manual labour            | 4583  | 1760(12.0) | 12.1 | 0.002*  | 1095(7.5)   | 32.1  | <0.001* |
| White collar             | 7751  | 2736(18.7) |      |         | 2086(14.3)  |       |         |
| Other                    | 2284  | 842(5.8)   |      |         | 688(4.7)    |       |         |
| <b>Education</b>         |       |            |      |         |             |       |         |
| Primary school and below | 5805  | 1993(13.6) | 26.9 | <0.001* | 1589(10.87) | 21.2  | <0.001* |
| Junior middle school     | 3094  | 1196(8.2)  |      |         | 844(5.8)    |       |         |
| Senior middle school     | 4556  | 1676(11.5) |      |         | 1191(8.2)   |       |         |
| Undergraduate and above  | 1163  | 473(3.2)   |      |         | 245(1.7)    |       |         |
| <b>Marriage</b>          |       |            |      |         |             |       |         |
| Unmarried                | 192   | 59(0.4)    | 14.1 | <0.001* | 27(0.2)     | 23.1  | <0.001* |
| Married                  | 12988 | 4795(32.8) |      |         | 3427(23.4)  |       |         |
| Divorced                 | 201   | 53(0.4)    |      |         | 47(0.2)     |       |         |
| Widowed                  | 1237  | 431(3.0)   |      |         | 368(2.5)    |       |         |
| <b>Drinking</b>          |       |            |      |         |             |       |         |
| Yes                      | 4169  | 923(6.3)   | 44.5 | <0.001* | 663(4.5)    | 24.6  | <0.001* |
| No                       | 10449 | 4415(30.2) |      |         | 3206(21.9)  |       |         |
| <b>Smoking</b>           |       |            |      |         |             |       |         |
| Yes                      | 2151  | 1688(11.6) | 39.7 | <0.001* | 1101(7.5)   | 0.01  | 0.92    |
| No                       | 12467 | 3650(25.0) |      |         | 2768(18.9)  |       |         |



|                             |       |            |      |         |            |       |         |
|-----------------------------|-------|------------|------|---------|------------|-------|---------|
| <b>Hypertension</b>         |       |            |      |         |            |       |         |
| Yes                         | 5701  | 2138(14.6) | 3.9  | 0.05    | 2155(14.7) | 616.8 | <0.001* |
| No                          | 8917  | 3200(21.9) |      |         | 1714(11.7) |       |         |
| <b>Diabetes</b>             |       |            |      |         |            |       |         |
| Yes                         | 859   | 335(2.3)   | 2.4  | 0.1     | 317(2.2)   | 51.0  | <0.001* |
| No                          | 13759 | 5003(34.2) |      |         | 3552(24.3) |       |         |
| <b>Dyslipidaemia</b>        |       |            |      |         |            |       |         |
| <b>Hypertriglyceridemia</b> |       |            |      |         |            |       |         |
| Yes                         | 4113  | 1724(11.8) | 72.0 | <0.001* | 1497(10.2) | 289.9 | <0.001* |
| No                          | 10505 | 3614(24.7) |      |         | 2372(16.2) |       |         |
| <b>Hypercholesterolemia</b> |       |            |      |         |            |       |         |
| Yes                         | 3787  | 1469(10.1) | 11.4 | 0.001*  | 1267(8.7)  | 128.3 | <0.001* |
| No                          | 10831 | 3869(26.5) |      |         | 2602(17.8) |       |         |
| <b>High LDL-C</b>           |       |            |      |         |            |       |         |
| Yes                         | 5251  | 1921(13.1) | 0.02 | 0.9     | 1334(9.1)  | 4.8   | 0.03*   |
| No                          | 9367  | 3417(23.4) |      |         | 2535(17.3) |       |         |
| <b>Low HDL-C</b>            |       |            |      |         |            |       |         |
| Yes                         | 4437  | 1704(11.7) | 9.8  | 0.002*  | 1215(8.3)  | 2.8   | 0.09    |
| No                          | 10831 | 3634(24.9) |      |         | 2654(18.2) |       |         |

1 Categorical variables are presented as counts and percentages. HDL-c, high density lipoprotein-cholesterol; LDL-  
2 c, low density lipoprotein-cholesterol.

3 Data were compared by  $\chi^2$  tests. \* $P < 0.05$ , Statistically significant.

4  
5 **Table 2 Prevalence of overweight and obesity in men and women according to age group**

| Age<br>(years) | Overweight |           | <i>P</i> | Obesity   |           | <i>P</i> |
|----------------|------------|-----------|----------|-----------|-----------|----------|
|                | Male(%)    | female(%) |          | male(%)   | female(%) |          |
| 35-44          | 994(40.2)  | 872(29.5) | <0.001   | 631(25.5) | 515(17.4) | <0.001   |
| 45-54          | 735(43.1)  | 706(34.4) |          | 517(30.3) | 636(31.0) |          |
| 55-64          | 476(35.8)  | 591(36.8) |          | 389(29.3) | 531(33.0) |          |
| ≥65            | 530(40.3)  | 434(36.5) |          | 319(24.3) | 332(27.9) |          |

1 Date were compared by  $\chi^2$  tests. \* $P$ <0.05, Statistically significant.

2  
3 **Table 3 Prevalence of overweight and obesity in Han, Uyghur and Kazak according to age**

4 **group**

| Age<br>(years) | Overweight |           |           | $P$    | Obesity   |           |           | $P$    |
|----------------|------------|-----------|-----------|--------|-----------|-----------|-----------|--------|
|                | Han(%)     | Uyghur(%) | Kazak(%)  |        | Han(%)    | Uyghur(%) | Kazak(%)  |        |
| 35-44          | 712(35.0)  | 573(34.6) | 581(33.6) | <0.001 | 273(13.4) | 422(25.5) | 451(26.1) | <0.001 |
| 45-54          | 599(43.9)  | 481(38.1) | 361(31.9) |        | 246(18.0) | 436(34.5) | 471(41.6) |        |
| 55-64          | 497(45.9)  | 354(32.6) | 216(28.3) |        | 268(24.7) | 318(29.3) | 333(43.6) |        |
| ≥65            | 572(45.0)  | 227(29.9) | 165(35.1) |        | 295(23.2) | 185(24.3) | 171(36.4) |        |

5 Date were compared by  $\chi^2$  tests. \* $P$ <0.05, Statistically significant.

6  
7 **Table 4 Multivariable regression analysis of correlates of overweight and obesity in residents**  
8 **of Xinjiang Province**

| Characteristic           | B    | S.E. | Wald | df | $P$     | OR   | 95%CI   |
|--------------------------|------|------|------|----|---------|------|---------|
| <b>Area</b>              | -0.1 | 0.04 | 10.4 | 1  | 0.001*  | 0.9  | 0.8-0.9 |
| <b>Sex</b>               | -0.3 | 0.05 | 32.5 | 1  | <0.001* | 0.8  | 0.7-0.8 |
| <b>Ethnicity</b>         |      |      | 94.4 | 2  | <0.001* |      |         |
| Han                      | -    | -    | -    | -  | -       | 1    | -       |
| Uygur                    | 0.4  | 0.05 | 50.0 | 1  | <0.001* | 1.4  | 1.3-1.6 |
| Kazakh                   | 0.50 | 0.05 | 86.2 | 1  | <0.001* | 1.7  | 1.5-1.8 |
| <b>Age (years)</b>       |      |      | 71.2 | 3  | <0.001* |      |         |
| 35-44                    | -    | -    | -    | -  | -       | 1    | -       |
| 45-54                    | 0.4  | 0.05 | 62.8 | 1  | <0.001* | 1.5  | 1.3-1.6 |
| 55-64                    | 0.3  | 0.05 | 24.6 | 1  | <0.001* | 1.3  | 1.2-1.5 |
| ≥65                      | 0.1  | 0.06 | 3.1  | 1  | 0.08    | 1.11 | 1.0-1.3 |
| <b>Education</b>         |      |      | 17.9 | 3  | <0.001* |      |         |
| Primary school and below | -    | -    | -    | -  | -       | 1    | -       |
| Junior middle school     | 0.2  | 0.05 | 15.6 | 1  | <0.001* | 1.2  | 1.1-1.4 |
| Senior middle school     | 0.2  | 0.06 | 7.0  | 1  | 0.008*  | 1.2  | 1.0-1.3 |



1  
2  
3  
4  
5  
6  
7  
8  
9  
10  
11  
12  
13  
14  
15  
16  
17  
18  
19  
20  
21  
22  
23  
24  
25  
26  
27  
28  
29  
30  
31  
32  
33  
34  
35  
36  
37  
38  
39  
40  
41  
42  
43  
44  
45  
46  
47  
48  
49  
50  
51  
52  
53  
54  
55  
56  
57  
58  
59  
60

|                         |      |      |       |   |         |     |         |
|-------------------------|------|------|-------|---|---------|-----|---------|
| Undergraduate and above | 0.2  | 0.08 | 6.8   | 1 | 0.009*  | 1.3 | 1.1-1.5 |
| <b>Occupation</b>       |      |      | 10.4  | 2 | 0.006*  |     |         |
| Manual labour           | -    | -    | -     | - | -       | 1   | -       |
| White collar            | 0.01 | 0.05 | 0.04  | 1 | 0.8     | 1.0 | 0.9-1.1 |
| Other                   | 0.2  | 0.06 | 7.9   | 1 | 0.005*  | 1.2 | 1.1-1.4 |
| <b>Marriage</b>         |      |      | 26.5  | 3 | <0.001  |     |         |
| Unmarried               | -    | -    | -     | - | -       | 1   | -       |
| Married                 | 0.6  | 0.2  | 15.5  | 1 | <0.001* | 1.8 | 1.4-2.5 |
| Divorced                | 0.1  | 0.2  | 0.2   | 1 | 0.7     | 1.1 | 0.7-1.7 |
| Widowed                 | 0.6  | 0.2  | 12.4  | 1 | <0.001* | 1.8 | 1.3-2.5 |
| <b>Smoking</b>          | -0.2 | 0.05 | 9.0   | 1 | 0.003*  | 0.9 | 0.8-0.9 |
| <b>Drinking</b>         | 0.4  | 0.06 | 34.8  | 1 | <0.001* | 1.5 | 1.3-1.6 |
| <b>Hypertension</b>     | 0.8  | 0.04 | 340.4 | 1 | <0.001* | 2.1 | 2.0-2.3 |
| <b>Diabetes</b>         | 0.3  | 0.09 | 10.4  | 1 | 0.001*  | 1.3 | 1.1-1.6 |
| <b>Dyslipidaemia</b>    |      |      |       |   |         |     |         |
| Hypertriglyceridemia    | 0.9  | 0.05 | 371.4 | 1 | <0.001* | 2.4 | 2.2-2.7 |
| Hypercholesterolemia    | 0.2  | 0.05 | 20.9  | 1 | <0.001* | 1.2 | 1.1-1.3 |
| Low HDL-C               | 0.1  | 0.04 | 6.4   | 1 | 0.01*   | 1.1 | 1.0-1.2 |
| High LDL-C              | 0.02 | 0.04 | 0.16  | 1 | 0.69    | 1.0 | 0.9-1.1 |
| <b>Constant</b>         | -1.0 | 0.2  | 35.3  | 1 | <0.001  | -   | -       |

1 \* $P < 0.05$ , Statistically significant.

Supplementary Table 1 Prevalence of underweight

| Characteristic | N    | Underweight |        |
|----------------|------|-------------|--------|
|                |      | n (%)       | P      |
| <b>Sex</b>     |      |             |        |
| Male           | 6819 | 71(1.04)    | <0.001 |
| Female         | 7799 | 219(2.81)   |        |

\* $P < 0.05$ , Statistically significant.

For peer review only

## STROBE Statement—checklist of items that should be included in reports of observational studies

|                              | Item No | Recommendation                                                                                                                                                                                                                                                                                                                                                                                                                                                                                                                                                                                                                                                                                                                            |
|------------------------------|---------|-------------------------------------------------------------------------------------------------------------------------------------------------------------------------------------------------------------------------------------------------------------------------------------------------------------------------------------------------------------------------------------------------------------------------------------------------------------------------------------------------------------------------------------------------------------------------------------------------------------------------------------------------------------------------------------------------------------------------------------------|
| <b>Title and abstract</b>    | 1       | (a) Indicate the study's design with a commonly used term in the title or the abstract ( <a href="#">On page 1, line 1</a> )<br>(b) Provide in the abstract an informative and balanced summary of what was done and what was found ( <a href="#">On page 2</a> )                                                                                                                                                                                                                                                                                                                                                                                                                                                                         |
| <b>Introduction</b>          |         |                                                                                                                                                                                                                                                                                                                                                                                                                                                                                                                                                                                                                                                                                                                                           |
| Background/rationale         | 2       | Explain the scientific background and rationale for the investigation being reported ( <a href="#">On page 2, line 2-5</a> )                                                                                                                                                                                                                                                                                                                                                                                                                                                                                                                                                                                                              |
| Objectives                   | 3       | State specific objectives, including any prespecified hypotheses ( <a href="#">On page 2, line 2-5</a> )                                                                                                                                                                                                                                                                                                                                                                                                                                                                                                                                                                                                                                  |
| <b>Methods</b>               |         |                                                                                                                                                                                                                                                                                                                                                                                                                                                                                                                                                                                                                                                                                                                                           |
| Study design                 | 4       | Present key elements of study design early in the paper ( <a href="#">On page 4, line 9</a> )                                                                                                                                                                                                                                                                                                                                                                                                                                                                                                                                                                                                                                             |
| Setting                      | 5       | Describe the setting, locations, and relevant dates, including periods of recruitment, exposure, follow-up, and data collection ( <a href="#">On page 2, line 7</a> )                                                                                                                                                                                                                                                                                                                                                                                                                                                                                                                                                                     |
| Participants                 | 6       | (a) <i>Cohort study</i> —Give the eligibility criteria, and the sources and methods of selection of participants. Describe methods of follow-up<br><i>Case-control study</i> —Give the eligibility criteria, and the sources and methods of case ascertainment and control selection. Give the rationale for the choice of cases and controls<br><i>Cross-sectional study</i> —Give the eligibility criteria, and the sources and methods of selection of participants ( <a href="#">On page 4, line 9-20</a> )<br>(b) <i>Cohort study</i> —For matched studies, give matching criteria and number of exposed and unexposed<br><i>Case-control study</i> —For matched studies, give matching criteria and the number of controls per case |
| Variables                    | 7       | Clearly define all outcomes, exposures, predictors, potential confounders, and effect modifiers. Give diagnostic criteria, if applicable ( <a href="#">On page 5,6</a> )                                                                                                                                                                                                                                                                                                                                                                                                                                                                                                                                                                  |
| Data sources/<br>measurement | 8*      | For each variable of interest, give sources of data and details of methods of assessment (measurement). Describe comparability of assessment methods if there is more than one group ( <a href="#">On page 4,5</a> )                                                                                                                                                                                                                                                                                                                                                                                                                                                                                                                      |
| Bias                         | 9       | Describe any efforts to address potential sources of bias ( <a href="#">On page 11, line 1-3</a> )                                                                                                                                                                                                                                                                                                                                                                                                                                                                                                                                                                                                                                        |
| Study size                   | 10      | Explain how the study size was arrived at ( <a href="#">On page 4, line 15-16</a> )                                                                                                                                                                                                                                                                                                                                                                                                                                                                                                                                                                                                                                                       |
| Quantitative variables       | 11      | Explain how quantitative variables were handled in the analyses. If applicable, describe which groupings were chosen and why ( <a href="#">On page 4,5</a> )                                                                                                                                                                                                                                                                                                                                                                                                                                                                                                                                                                              |
| Statistical methods          | 12      | (a) Describe all statistical methods, including those used to control for confounding ( <a href="#">On page 6</a> )<br>(b) Describe any methods used to examine subgroups and interactions<br>(c) Explain how missing data were addressed<br>(d) <i>Cohort study</i> —If applicable, explain how loss to follow-up was addressed<br><i>Case-control study</i> —If applicable, explain how matching of cases and controls was addressed<br><i>Cross-sectional study</i> —If applicable, describe analytical methods taking account of sampling strategy ( <a href="#">On page 6</a> )<br>(e) Describe any sensitivity analyses                                                                                                             |

1  
2  
3  
4  
5  
6  
7  
8  
9  
10  
11  
12  
13  
14  
15  
16  
17  
18  
19  
20  
21  
22  
23  
24  
25  
26  
27  
28  
29  
30  
31  
32  
33  
34  
35  
36  
37  
38  
39  
40  
41  
42  
43  
44  
45  
46  
47  
48  
49  
50  
51  
52  
53  
54  
55  
56  
57  
58  
59  
60

Continued on next page

For peer review only

| <b>Results</b>           |     |                                                                                                                                                                                                                                                                                                                                                                                                                                                                               |
|--------------------------|-----|-------------------------------------------------------------------------------------------------------------------------------------------------------------------------------------------------------------------------------------------------------------------------------------------------------------------------------------------------------------------------------------------------------------------------------------------------------------------------------|
| Participants             | 13* | (a) Report numbers of individuals at each stage of study—eg numbers potentially eligible, examined for eligibility, confirmed eligible, included in the study, completing follow-up, and analysed ( <a href="#">On page 4, line 15-16</a> )<br>(b) Give reasons for non-participation at each stage<br>(c) Consider use of a flow diagram                                                                                                                                     |
| Descriptive data         | 14* | (a) Give characteristics of study participants (eg demographic, clinical, social) and information on exposures and potential confounders ( <a href="#">On page 14, Table1</a> )<br>(b) Indicate number of participants with missing data for each variable of interest<br>(c) <i>Cohort study</i> —Summarise follow-up time (eg, average and total amount)                                                                                                                    |
| Outcome data             | 15* | <i>Cohort study</i> —Report numbers of outcome events or summary measures over time<br><i>Case-control study</i> —Report numbers in each exposure category, or summary measures of exposure<br><i>Cross-sectional study</i> —Report numbers of outcome events or summary measures ( <a href="#">On page 6-7</a> )                                                                                                                                                             |
| Main results             | 16  | (a) Give unadjusted estimates and, if applicable, confounder-adjusted estimates and their precision (eg, 95% confidence interval). Make clear which confounders were adjusted for and why they were included ( <a href="#">On page 6,7</a> )<br>(b) Report category boundaries when continuous variables were categorized<br>(c) If relevant, consider translating estimates of relative risk into absolute risk for a meaningful time period ( <a href="#">On page 6,7</a> ) |
| Other analyses           | 17  | Report other analyses done—eg analyses of subgroups and interactions, and sensitivity analyses ( <a href="#">On page 6,7</a> )                                                                                                                                                                                                                                                                                                                                                |
| <b>Discussion</b>        |     |                                                                                                                                                                                                                                                                                                                                                                                                                                                                               |
| Key results              | 18  | Summarise key results with reference to study objectives ( <a href="#">On page 8</a> )                                                                                                                                                                                                                                                                                                                                                                                        |
| Limitations              | 19  | Discuss limitations of the study, taking into account sources of potential bias or imprecision. Discuss both direction and magnitude of any potential bias ( <a href="#">On page 10,11</a> )                                                                                                                                                                                                                                                                                  |
| Interpretation           | 20  | Give a cautious overall interpretation of results considering objectives, limitations, multiplicity of analyses, results from similar studies, and other relevant evidence ( <a href="#">On page 11</a> )                                                                                                                                                                                                                                                                     |
| Generalisability         | 21  | Discuss the generalisability (external validity) of the study results ( <a href="#">On page 11</a> )                                                                                                                                                                                                                                                                                                                                                                          |
| <b>Other information</b> |     |                                                                                                                                                                                                                                                                                                                                                                                                                                                                               |
| Funding                  | 22  | Give the source of funding and the role of the funders for the present study and, if applicable, for the original study on which the present article is based ( <a href="#">On page 11</a> )                                                                                                                                                                                                                                                                                  |

\*Give information separately for cases and controls in case-control studies and, if applicable, for exposed and unexposed groups in cohort and cross-sectional studies.

**Note:** An Explanation and Elaboration article discusses each checklist item and gives methodological background and published examples of transparent reporting. The STROBE checklist is best used in conjunction with this article (freely available on the Web sites of PLoS Medicine at <http://www.plosmedicine.org/>, Annals of Internal Medicine at <http://www.annals.org/>, and Epidemiology at <http://www.epidem.com/>). Information on the STROBE Initiative is available at [www.strobe-statement.org](http://www.strobe-statement.org).
