# Supplementary material for: Prevalence of overweight and obesity and associated risk factors among adult residents of northwest China: a cross-sectional study
Source: PubMed Central journal article supplement — BMJ Open. 2019 Sep 27;9(9):e028131. doi: 10.1136/bmjopen-2018-028131 (PMC6773337; doi:10.1136/bmjopen-2018-028131), 2019-09-27
Supplement: bmjopen-2018-028131supp001.pdf [file bmjopen-2018-028131supp001.pdf]

Supplementary Table 1 Prevalence of underweight

| Characteristic | N    | Underweight |        |
|----------------|------|-------------|--------|
|                |      | n (%)       | P      |
| <b>Sex</b>     |      |             |        |
| Male           | 6819 | 71(1.04)    | <0.001 |
| Female         | 7799 | 219(2.81)   |        |

\* $P < 0.05$ , Statistically significant.
